# Supplementary material
Source: publisher figshare collection journal article supplement (https://acs.figshare.com/ndownloader/files/4863571)
Supplement: Supplementary file 1 [file 4863571]

REMARK   3                                                                      
REMARK   3 REFINEMENT.                                                          
REMARK   3   PROGRAM     : PHENIX (1.10.1_2155: ???)                            
REMARK   3   AUTHORS     : Adams,Afonine,Bunkoczi,Burnley,Chen,Dar,Davis,       
REMARK   3               : Draizen,Echols,Gildea,Gros,Grosse-Kunstleve,Headd,   
REMARK   3               : Hintze,Hung,Ioerger,McCoy,McKee,Moriarty,Oeffner,    
REMARK   3               : Read,Richardson,Richardson,Sacchettini,Sauter,       
REMARK   3               : Sobolev,Storoni,Terwilliger,Williams,Zwart           
REMARK   3                                                                      
REMARK   3  REFINEMENT TARGET : ML                                              
REMARK   3                                                                      
REMARK   3  DATA USED IN REFINEMENT.                                            
REMARK   3   RESOLUTION RANGE HIGH (ANGSTROMS) : 1.900                          
REMARK   3   RESOLUTION RANGE LOW  (ANGSTROMS) : 63.805                         
REMARK   3   MIN(FOBS/SIGMA_FOBS)              : 1.33                           
REMARK   3   COMPLETENESS FOR RANGE        (%) : 99.25                          
REMARK   3   NUMBER OF REFLECTIONS             : 21935                          
REMARK   3   NUMBER OF REFLECTIONS (NON-ANOMALOUS) : 21935                      
REMARK   3                                                                      
REMARK   3  FIT TO DATA USED IN REFINEMENT.                                     
REMARK   3   R VALUE     (WORKING + TEST SET) : 0.2227                          
REMARK   3   R VALUE            (WORKING SET) : 0.2199                          
REMARK   3   FREE R VALUE                     : 0.2504                          
REMARK   3   FREE R VALUE TEST SET SIZE   (%) : 9.06                            
REMARK   3   FREE R VALUE TEST SET COUNT      : 1987                            
REMARK   3                                                                      
REMARK   3  FIT TO DATA USED IN REFINEMENT (IN BINS).                           
REMARK   3   BIN  RESOLUTION RANGE  COMPL.    NWORK NFREE   RWORK  RFREE  CCWOR 
REMARK   3     1 63.8412 -  4.5789    0.98     1566   156  0.2141 0.2363   0.88 
REMARK   3     2  4.5789 -  3.6345    1.00     1473   146  0.1737 0.1958   0.94 
REMARK   3     3  3.6345 -  3.1751    1.00     1466   147  0.1985 0.2429   0.89 
REMARK   3     4  3.1751 -  2.8848    1.00     1435   143  0.2205 0.2596   0.88 
REMARK   3     5  2.8848 -  2.6780    1.00     1437   144  0.2340 0.2770   0.86 
REMARK   3     6  2.6780 -  2.5201    1.00     1435   142  0.2689 0.2930   0.83 
REMARK   3     7  2.5201 -  2.3939    1.00     1407   140  0.2655 0.3511   0.84 
REMARK   3     8  2.3939 -  2.2897    1.00     1422   142  0.2507 0.2865   0.85 
REMARK   3     9  2.2897 -  2.2015    1.00     1407   140  0.2868 0.3427   0.81 
REMARK   3    10  2.2015 -  2.1256    1.00     1395   140  0.2707 0.2723   0.80 
REMARK   3    11  2.1256 -  2.0591    1.00     1401   139  0.3030 0.3252   0.72 
REMARK   3    12  2.0591 -  2.0002    1.00     1413   141  0.3224 0.3178   0.71 
REMARK   3    13  2.0002 -  1.9476    1.00     1390   139  0.3534 0.4028   0.62 
REMARK   3    14  1.9476 -  1.9000    0.92     1301   128  0.4181 0.4299   0.42 
REMARK   3                                                                      
REMARK   3  BULK SOLVENT MODELLING.                                             
REMARK   3   METHOD USED        : FLAT BULK SOLVENT MODEL                       
REMARK   3   SOLVENT RADIUS     : 1.11                                          
REMARK   3   SHRINKAGE RADIUS   : 0.90                                          
REMARK   3   GRID STEP FACTOR   : 4.00                                          
REMARK   3                                                                      
REMARK   3  ERROR ESTIMATES.                                                    
REMARK   3   COORNINATE ERROR (MAXIMUM-LIKELIHOOD BASED)     : 0.29             
REMARK   3   PHASE ERROR (DEGREES, MAXIMUM-LIKELIHOOD BASED) : 29.91            
REMARK   3                                                                      
REMARK   3  STRUCTURE FACTORS CALCULATION ALGORITHM : FFT                       
REMARK   3                                                                      
REMARK   3  RESTRAINTS LIBRARY                                                  
REMARK   3    GEOSTD + MON.LIB. + CDL v1.2                                      
REMARK   3                                                                      
REMARK   3  DEVIATIONS FROM IDEAL VALUES.                                       
REMARK   3                 RMSD     MAX  COUNT                                  
REMARK   3   BOND      :  0.019   0.188    998                                  
REMARK   3   ANGLE     :  1.623   9.691   1327                                  
REMARK   3   CHIRALITY :  0.082   0.253    160                                  
REMARK   3   PLANARITY :  0.011   0.041    165                                  
REMARK   3   DIHEDRAL  : 20.068  95.429    619                                  
REMARK   3   MIN NONBONDED DISTANCE : 2.007                                     
REMARK   3                                                                      
REMARK   3  MOLPROBITY STATISTICS.                                              
REMARK   3   ALL-ATOM CLASHSCORE : 2.53                                         
REMARK   3   RAMACHANDRAN PLOT:                                                 
REMARK   3     OUTLIERS : 0.97  %                                               
REMARK   3     ALLOWED  : 5.83  %                                               
REMARK   3     FAVORED  : 93.20 %                                               
REMARK   3   ROTAMER OUTLIERS : 5.15 %                                          
REMARK   3   CBETA DEVIATIONS : 0                                               
REMARK   3                                                                      
REMARK   3  ATOMIC DISPLACEMENT PARAMETERS.                                     
REMARK   3   WILSON B : 46.21                                                   
REMARK   3   RMS(B_ISO_OR_EQUIVALENT_BONDED) : 9.38                             
REMARK   3   ATOMS          NUMBER OF ATOMS                                     
REMARK   3                    ISO.  ANISO.                                      
REMARK   3    ALL         :   2057     941                                      
REMARK   3    ALL (NO H)  :   1020     941                                      
REMARK   3    SOLVENT     :     38       0                                      
REMARK   3    NON-SOLVENT :    982     941                                      
REMARK   3    HYDROGENS   :   1037       0                                      
REMARK   3                                                                      
REMARK   3  TLS DETAILS.                                                        
REMARK   3   NUMBER OF TLS GROUPS: 15                                           
REMARK   3   ORIGIN: CENTER OF MASS                                             
REMARK   3   TLS GROUP : 1                                                      
REMARK   3    SELECTION: chain 'A' and (resid    1  through   11 )              
REMARK   3    ORIGIN FOR THE GROUP (A):  11.8389  92.3364 103.3953              
REMARK   3    T TENSOR                                                          
REMARK   3      T11:   1.1598 T22:   0.5250                                     
REMARK   3      T33:   0.5142 T12:  -0.0455                                     
REMARK   3      T13:  -0.0162 T23:   0.0500                                     
REMARK   3    L TENSOR                                                          
REMARK   3      L11:   5.9145 L22:   7.6235                                     
REMARK   3      L33:   5.8855 L12:   0.1555                                     
REMARK   3      L13:   3.6934 L23:  -1.9010                                     
REMARK   3    S TENSOR                                                          
REMARK   3      S11:  -0.0251 S12:  -0.7333 S13:   0.1946                       
REMARK   3      S21:   2.2187 S22:  -0.0238 S23:   0.0849                       
REMARK   3      S31:   0.5691 S32:  -0.2246 S33:  -0.0842                       
REMARK   3   TLS GROUP : 2                                                      
REMARK   3    SELECTION: chain 'A' and (resid   12  through   21 )              
REMARK   3    ORIGIN FOR THE GROUP (A):   7.4653  91.9320  95.5158              
REMARK   3    T TENSOR                                                          
REMARK   3      T11:   0.7017 T22:   0.4659                                     
REMARK   3      T33:   0.4247 T12:  -0.0420                                     
REMARK   3      T13:  -0.0107 T23:   0.0514                                     
REMARK   3    L TENSOR                                                          
REMARK   3      L11:   1.8894 L22:   5.2269                                     
REMARK   3      L33:   4.9491 L12:  -2.9392                                     
REMARK   3      L13:   2.2836 L23:  -4.8775                                     
REMARK   3    S TENSOR                                                          
REMARK   3      S11:   0.2454 S12:  -0.1315 S13:   0.1111                       
REMARK   3      S21:  -0.2593 S22:  -0.1572 S23:  -0.1080                       
REMARK   3      S31:   1.2858 S32:  -0.8334 S33:  -0.0893                       
REMARK   3   TLS GROUP : 3                                                      
REMARK   3    SELECTION: chain 'B' and (resid    1  through   11 )              
REMARK   3    ORIGIN FOR THE GROUP (A):  26.3551  90.4748  92.6826              
REMARK   3    T TENSOR                                                          
REMARK   3      T11:   0.8073 T22:   0.8989                                     
REMARK   3      T33:   0.6917 T12:   0.1800                                     
REMARK   3      T13:   0.1051 T23:   0.0954                                     
REMARK   3    L TENSOR                                                          
REMARK   3      L11:   4.4281 L22:   7.5260                                     
REMARK   3      L33:   5.4722 L12:   4.5712                                     
REMARK   3      L13:  -2.1519 L23:  -2.3360                                     
REMARK   3    S TENSOR                                                          
REMARK   3      S11:  -2.1608 S12:   0.4765 S13:  -2.0018                       
REMARK   3      S21:   0.2684 S22:   0.4993 S23:  -1.3002                       
REMARK   3      S31:   1.7150 S32:   1.3760 S33:   1.6579                       
REMARK   3   TLS GROUP : 4                                                      
REMARK   3    SELECTION: chain 'B' and (resid   12  through   21 )              
REMARK   3    ORIGIN FOR THE GROUP (A):  21.1604  94.3957  99.0204              
REMARK   3    T TENSOR                                                          
REMARK   3      T11:   0.6661 T22:   0.6116                                     
REMARK   3      T33:   0.5489 T12:   0.1106                                     
REMARK   3      T13:  -0.0967 T23:  -0.0034                                     
REMARK   3    L TENSOR                                                          
REMARK   3      L11:   6.3731 L22:   5.7529                                     
REMARK   3      L33:   5.6560 L12:  -1.7839                                     
REMARK   3      L13:  -5.9115 L23:   2.3392                                     
REMARK   3    S TENSOR                                                          
REMARK   3      S11:  -0.5842 S12:  -0.9033 S13:   0.8282                       
REMARK   3      S21:   0.6816 S22:   0.7952 S23:  -1.0269                       
REMARK   3      S31:   0.4067 S32:   1.8073 S33:  -0.1486                       
REMARK   3   TLS GROUP : 5                                                      
REMARK   3    SELECTION: chain 'C' and (resid    1  through   11 )              
REMARK   3    ORIGIN FOR THE GROUP (A):   9.9467  86.7389  87.4000              
REMARK   3    T TENSOR                                                          
REMARK   3      T11:   0.9937 T22:   0.5320                                     
REMARK   3      T33:   0.5575 T12:  -0.0046                                     
REMARK   3      T13:  -0.1919 T23:   0.0467                                     
REMARK   3    L TENSOR                                                          
REMARK   3      L11:   3.2053 L22:   8.8323                                     
REMARK   3      L33:   5.4054 L12:  -0.0390                                     
REMARK   3      L13:  -3.9752 L23:  -1.8882                                     
REMARK   3    S TENSOR                                                          
REMARK   3      S11:   0.3719 S12:   0.2935 S13:  -0.5824                       
REMARK   3      S21:  -0.9330 S22:  -0.0366 S23:   1.3828                       
REMARK   3      S31:   1.2897 S32:  -0.8198 S33:  -0.6098                       
REMARK   3   TLS GROUP : 6                                                      
REMARK   3    SELECTION: chain 'C' and (resid   12  through   21 )              
REMARK   3    ORIGIN FOR THE GROUP (A):  17.9157  89.8646  85.7527              
REMARK   3    T TENSOR                                                          
REMARK   3      T11:   0.7246 T22:   0.4067                                     
REMARK   3      T33:   0.4305 T12:   0.0845                                     
REMARK   3      T13:  -0.0166 T23:  -0.0036                                     
REMARK   3    L TENSOR                                                          
REMARK   3      L11:   3.2478 L22:   5.6918                                     
REMARK   3      L33:   3.4078 L12:   0.2636                                     
REMARK   3      L13:   1.7515 L23:   1.9596                                     
REMARK   3    S TENSOR                                                          
REMARK   3      S11:  -0.9412 S12:   0.4319 S13:  -0.7033                       
REMARK   3      S21:  -1.1955 S22:   0.5067 S23:  -0.6386                       
REMARK   3      S31:   0.4963 S32:   0.5045 S33:   0.5705                       
REMARK   3   TLS GROUP : 7                                                      
REMARK   3    SELECTION: chain 'D' and (resid    1  through    6 )              
REMARK   3    ORIGIN FOR THE GROUP (A):  11.1126 108.9691 104.2795              
REMARK   3    T TENSOR                                                          
REMARK   3      T11:   0.5430 T22:   0.5415                                     
REMARK   3      T33:   0.4324 T12:   0.0183                                     
REMARK   3      T13:   0.1238 T23:  -0.0185                                     
REMARK   3    L TENSOR                                                          
REMARK   3      L11:   6.0955 L22:   6.5054                                     
REMARK   3      L33:   5.1956 L12:   4.7425                                     
REMARK   3      L13:   1.3450 L23:  -2.3493                                     
REMARK   3    S TENSOR                                                          
REMARK   3      S11:   0.7311 S12:  -1.6911 S13:   0.1846                       
REMARK   3      S21:   0.9886 S22:  -0.4877 S23:   0.1408                       
REMARK   3      S31:  -0.0104 S32:   0.9237 S33:  -0.4838                       
REMARK   3   TLS GROUP : 8                                                      
REMARK   3    SELECTION: chain 'D' and (resid    7  through   12 )              
REMARK   3    ORIGIN FOR THE GROUP (A):   6.2160  99.2071 111.6806              
REMARK   3    T TENSOR                                                          
REMARK   3      T11:   1.2884 T22:   1.8283                                     
REMARK   3      T33:   1.3442 T12:   0.2901                                     
REMARK   3      T13:   0.1243 T23:   0.3778                                     
REMARK   3    L TENSOR                                                          
REMARK   3      L11:   5.4178 L22:   9.9329                                     
REMARK   3      L33:   4.2879 L12:  -5.4822                                     
REMARK   3      L13:   3.8293 L23:  -1.1907                                     
REMARK   3    S TENSOR                                                          
REMARK   3      S11:  -1.4902 S12:  -0.3088 S13:  -0.7070                       
REMARK   3      S21:   1.2777 S22:   3.2501 S23:   4.1890                       
REMARK   3      S31:   1.9820 S32:   4.9380 S33:  -2.0197                       
REMARK   3   TLS GROUP : 9                                                      
REMARK   3    SELECTION: chain 'D' and (resid   13  through   21 )              
REMARK   3    ORIGIN FOR THE GROUP (A):  16.4769 109.9173 103.3470              
REMARK   3    T TENSOR                                                          
REMARK   3      T11:   0.5877 T22:   0.7864                                     
REMARK   3      T33:   0.4378 T12:   0.0103                                     
REMARK   3      T13:   0.0814 T23:   0.0344                                     
REMARK   3    L TENSOR                                                          
REMARK   3      L11:   4.0799 L22:   7.6609                                     
REMARK   3      L33:   5.7588 L12:   5.0250                                     
REMARK   3      L13:  -4.7733 L23:  -6.4243                                     
REMARK   3    S TENSOR                                                          
REMARK   3      S11:  -0.0758 S12:  -1.4432 S13:  -0.2120                       
REMARK   3      S21:  -0.1644 S22:  -0.6066 S23:  -0.3280                       
REMARK   3      S31:   0.3326 S32:   2.0944 S33:   0.7137                       
REMARK   3   TLS GROUP : 10                                                     
REMARK   3    SELECTION: chain 'E' and (resid    1  through    5 )              
REMARK   3    ORIGIN FOR THE GROUP (A):   9.7841 116.3641  98.4677              
REMARK   3    T TENSOR                                                          
REMARK   3      T11:   0.6030 T22:   0.4500                                     
REMARK   3      T33:   0.4608 T12:  -0.0810                                     
REMARK   3      T13:   0.0966 T23:  -0.0919                                     
REMARK   3    L TENSOR                                                          
REMARK   3      L11:   5.8835 L22:   7.7552                                     
REMARK   3      L33:   4.6126 L12:   6.3508                                     
REMARK   3      L13:   3.2183 L23:   5.2590                                     
REMARK   3    S TENSOR                                                          
REMARK   3      S11:  -0.5195 S12:  -1.0657 S13:   0.8925                       
REMARK   3      S21:  -0.8865 S22:   0.2670 S23:   0.1395                       
REMARK   3      S31:  -3.2141 S32:  -0.2180 S33:   0.6544                       
REMARK   3   TLS GROUP : 11                                                     
REMARK   3    SELECTION: chain 'E' and (resid    6  through   13 )              
REMARK   3    ORIGIN FOR THE GROUP (A):  21.7651 123.0850 101.5824              
REMARK   3    T TENSOR                                                          
REMARK   3      T11:   1.0408 T22:   1.3684                                     
REMARK   3      T33:   1.1212 T12:  -0.3485                                     
REMARK   3      T13:   0.2306 T23:  -0.1857                                     
REMARK   3    L TENSOR                                                          
REMARK   3      L11:   3.1487 L22:   5.4453                                     
REMARK   3      L33:   1.5401 L12:  -4.0808                                     
REMARK   3      L13:  -0.8503 L23:   1.4803                                     
REMARK   3    S TENSOR                                                          
REMARK   3      S11:   0.6160 S12:  -2.1013 S13:   1.5740                       
REMARK   3      S21:   0.8064 S22:  -1.1589 S23:  -3.0221                       
REMARK   3      S31:  -1.1847 S32:   2.1473 S33:   0.5233                       
REMARK   3   TLS GROUP : 12                                                     
REMARK   3    SELECTION: chain 'E' and (resid   14  through   21 )              
REMARK   3    ORIGIN FOR THE GROUP (A):   7.8635 117.7225  93.1092              
REMARK   3    T TENSOR                                                          
REMARK   3      T11:   0.6917 T22:   0.6434                                     
REMARK   3      T33:   0.5249 T12:  -0.0542                                     
REMARK   3      T13:  -0.0208 T23:  -0.0874                                     
REMARK   3    L TENSOR                                                          
REMARK   3      L11:   5.2763 L22:   6.0945                                     
REMARK   3      L33:   5.0345 L12:   5.2759                                     
REMARK   3      L13:   3.6912 L23:   5.2624                                     
REMARK   3    S TENSOR                                                          
REMARK   3      S11:  -0.9990 S12:   0.7480 S13:   0.9725                       
REMARK   3      S21:  -0.9881 S22:   0.3851 S23:   0.2564                       
REMARK   3      S31:  -2.5960 S32:   0.0423 S33:   0.5064                       
REMARK   3   TLS GROUP : 13                                                     
REMARK   3    SELECTION: chain 'F' and (resid    1  through    6 )              
REMARK   3    ORIGIN FOR THE GROUP (A):   3.2077 111.4298  98.9031              
REMARK   3    T TENSOR                                                          
REMARK   3      T11:   0.5403 T22:   0.5318                                     
REMARK   3      T33:   0.6320 T12:   0.1407                                     
REMARK   3      T13:   0.0359 T23:  -0.0502                                     
REMARK   3    L TENSOR                                                          
REMARK   3      L11:   4.3178 L22:   4.0451                                     
REMARK   3      L33:   5.3627 L12:  -1.1637                                     
REMARK   3      L13:   3.7919 L23:  -3.6438                                     
REMARK   3    S TENSOR                                                          
REMARK   3      S11:  -0.5948 S12:  -0.0548 S13:  -0.2721                       
REMARK   3      S21:   0.4540 S22:   0.1435 S23:   1.6510                       
REMARK   3      S31:  -0.6460 S32:  -1.7231 S33:   0.4572                       
REMARK   3   TLS GROUP : 14                                                     
REMARK   3    SELECTION: chain 'F' and (resid    7  through   12 )              
REMARK   3    ORIGIN FOR THE GROUP (A):  -5.4391 120.5848  92.3764              
REMARK   3    T TENSOR                                                          
REMARK   3      T11:   1.5837 T22:   1.9413                                     
REMARK   3      T33:   1.7279 T12:   0.1034                                     
REMARK   3      T13:  -0.1423 T23:   0.5146                                     
REMARK   3    L TENSOR                                                          
REMARK   3      L11:   2.0223 L22:   4.5206                                     
REMARK   3      L33:   9.1982 L12:  -2.9716                                     
REMARK   3      L13:   3.4904 L23:  -4.5332                                     
REMARK   3    S TENSOR                                                          
REMARK   3      S11:   3.6073 S12:   7.0520 S13:   6.4972                       
REMARK   3      S21:  -2.1010 S22:  -1.4936 S23:  -0.5071                       
REMARK   3      S31:   3.2310 S32:  -1.1502 S33:  -1.0290                       
REMARK   3   TLS GROUP : 15                                                     
REMARK   3    SELECTION: chain 'F' and (resid   13  through   21 )              
REMARK   3    ORIGIN FOR THE GROUP (A):   2.7566 105.9314  99.8183              
REMARK   3    T TENSOR                                                          
REMARK   3      T11:   0.4819 T22:   0.5251                                     
REMARK   3      T33:   0.6090 T12:   0.0113                                     
REMARK   3      T13:   0.0853 T23:  -0.0736                                     
REMARK   3    L TENSOR                                                          
REMARK   3      L11:   4.5914 L22:   4.1090                                     
REMARK   3      L33:   5.6609 L12:   0.1145                                     
REMARK   3      L13:   3.4472 L23:  -3.1381                                     
REMARK   3    S TENSOR                                                          
REMARK   3      S11:   0.0734 S12:   0.4005 S13:  -2.0423                       
REMARK   3      S21:  -0.4094 S22:   0.1955 S23:   2.1346                       
REMARK   3      S31:   0.7289 S32:  -0.7083 S33:  -0.2506                       
REMARK   3                                                                      
LINK         N   VAL A   1                 C   LEU A  21                        
LINK         N   VAL B   1                 C   LEU B  21                        
LINK         N   VAL C   1                 C   LEU C  21                        
LINK         N   VAL D   1                 C   LEU D  21                        
LINK         N   VAL E   1                 C   LEU E  21                        
LINK         N   VAL F   1                 C   LEU F  21                        
SSBOND   1 CYS A    7    CYS A   12                                             
SSBOND   2 CYS C    7    CYS C   12                                             
SSBOND   3 CYS E    7    CYS E   12                                             
CRYST1   97.369   97.369   97.591  90.00  90.00 120.00 P 61 2 2                 
SCALE1      0.010270  0.005929  0.000000        0.00000                         
SCALE2      0.000000  0.011859  0.000000        0.00000                         
SCALE3      0.000000  0.000000  0.010247        0.00000                         
HETATM    1  N   ORN A   1       3.130  90.653  84.684  1.00 65.29           N  
ANISOU    1  N   ORN A   1    12130   6982   5696   -452  -1139    518       N  
HETATM    2  CA  ORN A   1       3.857  91.680  85.416  1.00 52.62           C  
ANISOU    2  CA  ORN A   1     9879   5656   4460   -181   -712    531       C  
HETATM    3  C   ORN A   1       5.204  91.112  85.942  1.00 55.04           C  
ANISOU    3  C   ORN A   1    10464   5690   4758    152   -524    541       C  
HETATM    4  O   ORN A   1       5.426  89.922  86.018  1.00 57.74           O  
ANISOU    4  O   ORN A   1    11414   5699   4825     88   -706    526       O  
HETATM    5  CB  ORN A   1       3.051  92.200  86.704  1.00 54.57           C  
ANISOU    5  CB  ORN A   1     9446   6323   4965   -634   -707    572       C  
HETATM    6  CG  ORN A   1       1.932  93.162  86.406  1.00 74.29           C  
ANISOU    6  CG  ORN A   1    11426   9214   7586   -824   -726    616       C  
HETATM    7  CD  ORN A   1       2.456  94.516  86.053  1.00 54.14           C  
ANISOU    7  CD  ORN A   1     8439   6841   5290   -381   -395    576       C  
HETATM    8  NE  ORN A   1       3.122  95.166  87.192  1.00 56.60           N  
ANISOU    8  NE  ORN A   1     8342   7283   5880   -232   -157    562       N  
HETATM    9  HA  ORN A   1       4.080  92.474  84.697  1.00 63.15           H  
HETATM   10  HB2 ORN A   1       2.639  91.343  87.255  1.00 65.48           H  
HETATM   11  HB3 ORN A   1       3.767  92.743  87.336  1.00 65.48           H  
HETATM   12  HG2 ORN A   1       1.335  92.774  85.573  1.00 89.15           H  
HETATM   13  HG3 ORN A   1       1.294  93.251  87.293  1.00 89.15           H  
HETATM   14  HD2 ORN A   1       1.615  95.143  85.745  1.00 64.97           H  
HETATM   15  HD3 ORN A   1       3.177  94.411  85.236  1.00 64.97           H  
HETATM   16  HE1 ORN A   1       2.500  95.540  87.907  1.00 67.92           H  
HETATM   17  H1  ORN A   1       3.715  90.137  84.022  1.00 78.35           H  
HETATM   18  H2  ORN A   1       2.716  89.941  85.291  1.00 78.35           H  
HETATM   19  H3  ORN A   1       2.354  91.023  84.130  1.00 78.35           H  
ATOM     20  N   LEU A   2       6.107  92.030  86.358  1.00 52.08           N  
ANISOU   20  N   LEU A   2     9604   5464   4719    495   -179    593       N  
ATOM     21  CA  LEU A   2       7.366  91.636  86.957  1.00 51.54           C  
ANISOU   21  CA  LEU A   2     9660   5198   4726    776     -5    663       C  
ATOM     22  C   LEU A   2       7.148  91.623  88.446  1.00 53.19           C  
ANISOU   22  C   LEU A   2     9537   5564   5106    388    -64    623       C  
ATOM     23  O   LEU A   2       6.465  92.502  88.979  1.00 55.60           O  
ANISOU   23  O   LEU A   2     9307   6200   5619    166    -61    589       O  
ATOM     24  CB  LEU A   2       8.486  92.639  86.677  1.00 49.84           C  
ANISOU   24  CB  LEU A   2     9058   5040   4838   1312    332    818       C  
ATOM     25  CG  LEU A   2       8.877  92.794  85.224  1.00 59.10           C  
ANISOU   25  CG  LEU A   2    10480   6101   5875   1830    488    930       C  
ATOM     26  CD1 LEU A   2       9.848  93.890  85.126  1.00 57.85           C  
ANISOU   26  CD1 LEU A   2     9778   6067   6135   2252    791   1154       C  
ATOM     27  CD2 LEU A   2       9.477  91.496  84.719  1.00 61.26           C  
ANISOU   27  CD2 LEU A   2    11562   5985   5729   2139    477    979       C  
ATOM     28  H   LEU A   2       5.969  92.878  86.359  1.00 62.49           H  
ATOM     29  HA  LEU A   2       7.631  90.753  86.656  1.00 61.85           H  
ATOM     30  HB2 LEU A   2       8.204  93.510  86.997  1.00 59.80           H  
ATOM     31  HB3 LEU A   2       9.277  92.357  87.162  1.00 59.80           H  
ATOM     32  HG  LEU A   2       8.097  93.013  84.690  1.00 70.92           H  
ATOM     33 HD11 LEU A   2      10.108  93.999  84.198  1.00 69.42           H  
ATOM     34 HD12 LEU A   2       9.438  94.705  85.455  1.00 69.42           H  
ATOM     35 HD13 LEU A   2      10.626  93.670  85.663  1.00 69.42           H  
ATOM     36 HD21 LEU A   2       9.725  91.604  83.788  1.00 73.51           H  
ATOM     37 HD22 LEU A   2      10.262  91.285  85.248  1.00 73.51           H  
ATOM     38 HD23 LEU A   2       8.819  90.789  84.807  1.00 73.51           H  
ATOM     39  N   VAL A   3       7.790  90.688  89.122  1.00 51.01           N  
ANISOU   39  N   VAL A   3     7026   5680   6677  -1211   -184    918       N  
ATOM     40  CA  VAL A   3       7.703  90.630  90.592  1.00 49.06           C  
ANISOU   40  CA  VAL A   3     6983   5215   6442  -1201    -21    910       C  
ATOM     41  C   VAL A   3       9.160  90.658  91.076  1.00 47.37           C  
ANISOU   41  C   VAL A   3     6887   5109   6003   -901   -100    834       C  
ATOM     42  O   VAL A   3       9.965  89.796  90.697  1.00 47.26           O  
ANISOU   42  O   VAL A   3     7054   5131   5771   -680   -229    736       O  
ATOM     43  CB  VAL A   3       6.978  89.412  91.078  1.00 50.85           C  
ANISOU   43  CB  VAL A   3     7575   5129   6619  -1324     24    907       C  
ATOM     44  CG1 VAL A   3       7.027  89.374  92.635  1.00 57.38           C  
ANISOU   44  CG1 VAL A   3     8655   5795   7352  -1303    212    928       C  
ATOM     45  CG2 VAL A   3       5.551  89.410  90.586  1.00 59.01           C  
ANISOU   45  CG2 VAL A   3     8411   6071   7939  -1650     65   1028       C  
ATOM     46  HA  VAL A   3       7.247  91.418  90.926  1.00 58.87           H  
ATOM     47  HB  VAL A   3       7.420  88.618  90.739  1.00 61.03           H  
ATOM     48 HG11 VAL A   3       6.558  88.584  92.946  1.00 68.86           H  
ATOM     49 HG12 VAL A   3       7.954  89.342  92.920  1.00 68.86           H  
ATOM     50 HG13 VAL A   3       6.601  90.172  92.983  1.00 68.86           H  
ATOM     51 HG21 VAL A   3       5.105  88.613  90.914  1.00 70.81           H  
ATOM     52 HG22 VAL A   3       5.101  90.202  90.919  1.00 70.81           H  
ATOM     53 HG23 VAL A   3       5.552  89.413  89.616  1.00 70.81           H  
ATOM     54  H   VAL A   3       8.298  90.086  88.777  1.00 61.22           H  
ATOM     55  N   PHE A   4       9.528  91.703  91.815  1.00 45.66           N  
ANISOU   55  N   PHE A   4     6532   4947   5868   -874    -61    873       N  
ATOM     56  CA  PHE A   4      10.821  91.784  92.473  1.00 45.38           C  
ANISOU   56  CA  PHE A   4     6605   4962   5675   -644   -185    837       C  
ATOM     57  C   PHE A   4      10.662  91.306  93.922  1.00 48.97           C  
ANISOU   57  C   PHE A   4     7502   5127   5977   -634   -107    789       C  
ATOM     58  O   PHE A   4       9.561  91.282  94.461  1.00 55.53           O  
ANISOU   58  O   PHE A   4     8450   5794   6856   -818    107    806       O  
ATOM     59  CB  PHE A   4      11.368  93.198  92.465  1.00 44.57           C  
ANISOU   59  CB  PHE A   4     6151   5040   5745   -656   -283    924       C  
ATOM     60  CG  PHE A   4      11.583  93.748  91.063  1.00 44.46           C  
ANISOU   60  CG  PHE A   4     5697   5347   5847   -708   -366   1046       C  
ATOM     61  CD2 PHE A   4      12.800  93.632  90.484  1.00 56.44           C  
ANISOU   61  CD2 PHE A   4     7041   7160   7244   -530   -488   1099       C  
ATOM     62  CD1 PHE A   4      10.535  94.250  90.346  1.00 65.55           C  
ANISOU   62  CD1 PHE A   4     8148   8033   8725   -928   -309   1121       C  
ATOM     63  CE2 PHE A   4      13.006  94.090  89.216  1.00 59.71           C  
ANISOU   63  CE2 PHE A   4     7079   7922   7687   -590   -521   1243       C  
ATOM     64  CE1 PHE A   4      10.740  94.691  89.057  1.00 59.29           C  
ANISOU   64  CE1 PHE A   4     7014   7542   7971   -997   -409   1265       C  
ATOM     65  CZ  PHE A   4      11.965  94.617  88.534  1.00 47.27           C  
ANISOU   65  CZ  PHE A   4     5348   6340   6271   -837   -493   1327       C  
ATOM     66  H   PHE A   4       9.031  92.391  91.951  1.00 54.79           H  
ATOM     67  HA  PHE A   4      11.454  91.204  92.021  1.00 54.46           H  
ATOM     68  HB2 PHE A   4      10.740  93.781  92.921  1.00 53.49           H  
ATOM     69  HB3 PHE A   4      12.222  93.208  92.924  1.00 53.49           H  
ATOM     70  HD2 PHE A   4      13.511  93.280  90.969  1.00 67.73           H  
ATOM     71  HD1 PHE A   4       9.690  94.307  90.730  1.00 78.66           H  
ATOM     72  HE2 PHE A   4      13.848  94.035  88.825  1.00 71.66           H  
ATOM     73  HE1 PHE A   4      10.041  95.063  88.570  1.00 71.15           H  
ATOM     74  HZ  PHE A   4      12.102  94.918  87.664  1.00 56.72           H  
ATOM     75  N   PHE A   5      11.770  90.883  94.522  1.00 48.67           N  
ANISOU   75  N   PHE A   5     7694   5052   5748   -419   -280    755       N  
ATOM     76  CA  PHE A   5      11.757  90.329  95.881  1.00 48.75           C  
ANISOU   76  CA  PHE A   5     8192   4793   5537   -407   -269    741       C  
ATOM     77  C   PHE A   5      12.616  91.209  96.771  1.00 54.95           C  
ANISOU   77  C   PHE A   5     9010   5600   6270   -315   -433    736       C  
ATOM     78  O   PHE A   5      13.589  91.825  96.320  1.00 52.04           O  
ANISOU   78  O   PHE A   5     8321   5428   6024   -198   -646    764       O  
ATOM     79  CB  PHE A   5      12.211  88.928  95.916  1.00 54.16           C  
ANISOU   79  CB  PHE A   5     9218   5312   6046   -254   -420    721       C  
ATOM     80  CG  PHE A   5      11.299  88.043  95.159  1.00 70.07           C  
ANISOU   80  CG  PHE A   5    11295   7218   8111   -381   -327    715       C  
ATOM     81  CD2 PHE A   5      11.514  87.786  93.804  1.00 75.68           C  
ANISOU   81  CD2 PHE A   5    11768   8090   8898   -265   -413    636       C  
ATOM     82  CD1 PHE A   5      10.159  87.543  95.769  1.00 64.22           C  
ANISOU   82  CD1 PHE A   5    10827   6237   7336   -646   -148    805       C  
ATOM     83  CE2 PHE A   5      10.636  86.960  93.108  1.00 79.09           C  
ANISOU   83  CE2 PHE A   5    12318   8368   9364   -403   -403    612       C  
ATOM     84  CE1 PHE A   5       9.275  86.704  95.072  1.00 73.02           C  
ANISOU   84  CE1 PHE A   5    11992   7206   8547   -820   -134    837       C  
ATOM     85  CZ  PHE A   5       9.513  86.423  93.760  1.00 68.66           C  
ANISOU   85  CZ  PHE A   5    11270   6748   8069   -700   -294    724       C  
ATOM     86  H   PHE A   5      12.551  90.905  94.163  1.00 58.41           H  
ATOM     87  HA  PHE A   5      10.849  90.356  96.222  1.00 58.50           H  
ATOM     88  HB2 PHE A   5      13.094  88.867  95.518  1.00 64.99           H  
ATOM     89  HB3 PHE A   5      12.236  88.622  96.837  1.00 64.99           H  
ATOM     90  HD2 PHE A   5      12.268  88.126  93.379  1.00 90.82           H  
ATOM     91  HD1 PHE A   5      10.009  87.719  96.669  1.00 77.06           H  
ATOM     92  HE2 PHE A   5      10.790  86.767  92.211  1.00 94.91           H  
ATOM     93  HE1 PHE A   5       8.525  86.355  95.498  1.00 87.63           H  
ATOM     94  HZ  PHE A   5       8.920  85.883  93.289  1.00 82.39           H  
ATOM     95  N   ALA A   6      12.099  91.451  97.968  1.00 48.85           N  
ANISOU   95  N   ALA A   6     8572   4651   5338   -413   -304    711       N  
ATOM     96  CA  ALA A   6      12.773  92.266  98.959  1.00 48.09           C  
ANISOU   96  CA  ALA A   6     8637   4504   5130   -347   -492    668       C  
ATOM     97  C   ALA A   6      12.566  91.614 100.314  1.00 50.90           C  
ANISOU   97  C   ALA A   6     9611   4635   5094   -369   -430    662       C  
ATOM     98  O   ALA A   6      11.581  90.887 100.513  1.00 51.82           O  
ANISOU   98  O   ALA A   6     9933   4666   5091   -506   -127    710       O  
ATOM     99  CB  ALA A   6      12.233  93.667  98.990  1.00 47.57           C  
ANISOU   99  CB  ALA A   6     8337   4483   5256   -439   -383    596       C  
ATOM    100  H   ALA A   6      11.339  91.146  98.232  1.00 58.62           H  
ATOM    101  HA  ALA A   6      13.723  92.299  98.769  1.00 57.71           H  
ATOM    102  HB1 ALA A   6      12.711  94.174  99.665  1.00 57.09           H  
ATOM    103  HB2 ALA A   6      12.361  94.073  98.119  1.00 57.09           H  
ATOM    104  HB3 ALA A   6      11.288  93.636  99.207  1.00 57.09           H  
ATOM    105  N   GLU A   7      13.520  91.836 101.210  1.00 52.74           N  
ANISOU  105  N   GLU A   7    10133   4778   5129   -262   -751    645       N  
ATOM    106  CA  GLU A   7      13.325  91.525 102.634  1.00 56.12           C  
ANISOU  106  CA  GLU A   7    11202   5014   5107   -305   -712    636       C  
ATOM    107  C   GLU A   7      12.817  92.809 103.246  1.00 59.72           C  
ANISOU  107  C   GLU A   7    11717   5480   5495   -348   -551    469       C  
ATOM    108  O   GLU A   7      13.416  93.862 103.007  1.00 56.37           O  
ANISOU  108  O   GLU A   7    11033   5088   5297   -285   -824    390       O  
ATOM    109  CB  GLU A   7      14.608  91.119 103.329  1.00 58.32           C  
ANISOU  109  CB  GLU A   7    11816   5157   5186   -165  -1212    698       C  
ATOM    110  CG  GLU A   7      15.042  89.745 103.032  1.00 71.27           C  
ANISOU  110  CG  GLU A   7    13552   6704   6824    -73  -1374    833       C  
ATOM    111  CD  GLU A   7      16.284  89.361 103.812  1.00 77.56           C  
ANISOU  111  CD  GLU A   7    14675   7338   7455     82  -1905    912       C  
ATOM    112  OE1 GLU A   7      16.738  90.173 104.652  1.00 89.02           O  
ANISOU  112  OE1 GLU A   7    16332   8749   8744     70  -2148    868       O  
ATOM    113  OE2 GLU A   7      16.799  88.253 103.568  1.00 83.62           O1-
ANISOU  113  OE2 GLU A   7    15501   7994   8276    228  -2118   1007       O1-
ATOM    114  H   GLU A   7      14.293  92.165 101.025  1.00 63.29           H  
ATOM    115  HA  GLU A   7      12.660  90.827 102.743  1.00 67.34           H  
ATOM    116  HB2 GLU A   7      15.317  91.720 103.050  1.00 69.98           H  
ATOM    117  HB3 GLU A   7      14.478  91.187 104.288  1.00 69.98           H  
ATOM    118  HG2 GLU A   7      14.332  89.128 103.270  1.00 85.53           H  
ATOM    119  HG3 GLU A   7      15.244  89.672 102.086  1.00 85.53           H  
ATOM    120  N   ASP A   8      11.649  92.759 103.860  1.00 59.10           N  
ANISOU  120  N   ASP A   8    11885   5390   5181   -453    -87    423       N  
ATOM    121  CA  ASP A   8      11.051  93.915 104.513  1.00 61.14           C  
ANISOU  121  CA  ASP A   8    12244   5651   5333   -425    140    207       C  
ATOM    122  C   ASP A   8      11.399  93.756 105.972  1.00 65.61           C  
ANISOU  122  C   ASP A   8    13545   6092   5293   -387     37    153       C  
ATOM    123  O   ASP A   8      10.891  92.838 106.626  1.00 68.22           O  
ANISOU  123  O   ASP A   8    14266   6424   5230   -489    318    283       O  
ATOM    124  CB  ASP A   8       9.549  93.918 104.275  1.00 61.43           C  
ANISOU  124  CB  ASP A   8    12045   5808   5488   -528    758    202       C  
ATOM    125  CG  ASP A   8       8.852  95.171 104.748  1.00 70.54           C  
ANISOU  125  CG  ASP A   8    13177   6978   6647   -423   1032    -61       C  
ATOM    126  OD1 ASP A   8       9.451  95.988 105.478  1.00 65.84           O  
ANISOU  126  OD1 ASP A   8    12913   6262   5842   -280    766   -273       O  
ATOM    127  OD2 ASP A   8       7.664  95.347 104.371  1.00 85.70           O1-
ANISOU  127  OD2 ASP A   8    14737   9011   8814   -470   1497    -67       O1-
ATOM    128  H   ASP A   8      11.168  92.049 103.915  1.00 70.92           H  
ATOM    129  HA  ASP A   8      11.437  94.737 104.173  1.00 73.36           H  
ATOM    130  HB2 ASP A   8       9.384  93.829 103.324  1.00 73.72           H  
ATOM    131  HB3 ASP A   8       9.158  93.166 104.747  1.00 73.72           H  
ATOM    132  N   CYS A   9      12.285  94.610 106.469  1.00 66.97           N  
ANISOU  132  N   CYS A   9    13920   6144   5380   -273   -411     -3       N  
ATOM    133  CA  CYS A   9      12.840  94.464 107.813  1.00 71.51           C  
ANISOU  133  CA  CYS A   9    15240   6572   5360   -239   -673    -47       C  
ATOM    134  C   CYS A   9      12.299  95.521 108.764  1.00 81.71           C  
ANISOU  134  C   CYS A   9    16935   7818   6294   -145   -474   -373       C  
ATOM    135  O   CYS A   9      12.339  96.717 108.464  1.00 75.12           O  
ANISOU  135  O   CYS A   9    15851   6918   5775    -49   -614   -599       O  
ATOM    136  CB  CYS A   9      14.359  94.527 107.727  1.00 70.96           C  
ANISOU  136  CB  CYS A   9    15150   6367   5445   -182  -1437     37       C  
ATOM    137  SG  CYS A   9      15.034  93.189 106.685  1.00 75.29           S  
ANISOU  137  SG  CYS A   9    15273   6982   6352   -187  -1628    364       S  
ATOM    138  H   CYS A   9      12.587  95.293 106.042  1.00 80.36           H  
ATOM    139  HA  CYS A   9      12.595  93.593 108.163  1.00 85.82           H  
ATOM    140  HB2 CYS A   9      14.622  95.376 107.338  1.00 85.15           H  
ATOM    141  HB3 CYS A   9      14.734  94.436 108.617  1.00 85.15           H  
ATOM    142  N   GLY A  10      11.755  95.066 109.898  1.00 80.47           N  
ANISOU  142  N   GLY A  10    17414   7695   5465   -168   -130   -394       N  
ATOM    143  CA  GLY A  10      11.476  95.915 111.032  1.00 86.02           C  
ANISOU  143  CA  GLY A  10    18702   8348   5631    -30    -14   -730       C  
ATOM    144  C   GLY A  10      12.602  95.864 112.053  1.00 89.84           C  
ANISOU  144  C   GLY A  10    19921   8619   5595    -17   -669   -750       C  
ATOM    145  O   GLY A  10      13.703  95.398 111.776  1.00 97.19           O  
ANISOU  145  O   GLY A  10    20773   9421   6735    -85  -1288   -524       O  
ATOM    146  H   GLY A  10      11.537  94.244 110.026  1.00 96.56           H  
ATOM    147  HA2 GLY A  10      11.367  96.832 110.735  1.00103.22           H  
ATOM    148  HA3 GLY A  10      10.655  95.627 111.461  1.00103.22           H  
ATOM    149  N   SER A  11      12.303  96.365 113.261  1.00 96.17           N  
ANISOU  149  N   SER A  11    21450   9393   5698     92   -528  -1036       N  
ATOM    150  CA  SER A  11      13.334  96.455 114.282  1.00107.08           C  
ANISOU  150  CA  SER A  11    23326  10558   6801    102  -1178  -1031       C  
ATOM    151  C   SER A  11      13.986  95.103 114.498  1.00120.84           C  
ANISOU  151  C   SER A  11    25175  12271   8469    -82  -1455   -594       C  
ATOM    152  O   SER A  11      15.211  94.966 114.406  1.00127.80           O  
ANISOU  152  O   SER A  11    26016  12937   9605   -111  -2200   -451       O  
ATOM    153  CB  SER A  11      12.721  96.968 115.575  1.00108.35           C  
ANISOU  153  CB  SER A  11    23989  10784   6395    238   -818  -1303       C  
ATOM    154  OG  SER A  11      11.513  96.264 115.809  1.00124.97           O  
ANISOU  154  OG  SER A  11    26074  13223   8187    182     44  -1185       O  
ATOM    155  H   SER A  11      11.528  96.650 113.501  1.00115.40           H  
ATOM    156  HA  SER A  11      14.016  97.083 113.997  1.00128.49           H  
ATOM    157  HB2 SER A  11      13.335  96.810 116.308  1.00130.02           H  
ATOM    158  HB3 SER A  11      12.532  97.915 115.489  1.00130.02           H  
ATOM    159  HG  SER A  11      11.158  96.533 116.521  1.00149.97           H  
ATOM    160  N   ASN A  12      13.172  94.079 114.735  1.00101.79           N  
ANISOU  160  N   ASN A  12    22822  10060   5794   -210   -872   -363       N  
ATOM    161  CA  ASN A  12      13.678  92.774 115.124  1.00103.20           C  
ANISOU  161  CA  ASN A  12    23167  10161   5885   -379  -1122     15       C  
ATOM    162  C   ASN A  12      13.570  91.697 114.044  1.00119.91           C  
ANISOU  162  C   ASN A  12    24831  12317   8413   -505  -1034    339       C  
ATOM    163  O   ASN A  12      14.285  90.696 114.127  1.00106.44           O  
ANISOU  163  O   ASN A  12    23165  10455   6821   -582  -1445    602       O  
ATOM    164  CB  ASN A  12      12.936  92.308 116.376  1.00110.34           C  
ANISOU  164  CB  ASN A  12    24535  11222   6168   -474   -652     82       C  
ATOM    165  CG  ASN A  12      13.246  93.191 117.587  1.00138.74           C  
ANISOU  165  CG  ASN A  12    28679  14742   9293   -341   -863   -206       C  
ATOM    166  ND2 ASN A  12      12.289  93.316 118.499  1.00138.80           N  
ANISOU  166  ND2 ASN A  12    28987  15008   8741   -321   -250   -312       N  
ATOM    167  OD1 ASN A  12      14.338  93.758 117.693  1.00144.73           O  
ANISOU  167  OD1 ASN A  12    29562  15223  10208   -257  -1578   -321       O  
ATOM    168  H   ASN A  12      12.315  94.117 114.676  1.00122.15           H  
ATOM    169  HA  ASN A  12      14.616  92.863 115.354  1.00123.84           H  
ATOM    170  HB2 ASN A  12      11.981  92.345 116.212  1.00132.41           H  
ATOM    171  HB3 ASN A  12      13.205  91.401 116.586  1.00132.41           H  
ATOM    172 HD21 ASN A  12      12.420  93.802 119.197  1.00166.56           H  
ATOM    173 HD22 ASN A  12      11.538  92.910 118.393  1.00166.56           H  
ATOM    174  N   LYS A  13      12.709  91.850 113.046  1.00 93.54           N  
ANISOU  174  N   LYS A  13    21068   9155   5319   -515   -533    317       N  
ATOM    175  CA  LYS A  13      12.430  90.722 112.172  1.00 89.97           C  
ANISOU  175  CA  LYS A  13    20260   8730   5195   -659   -385    643       C  
ATOM    176  C   LYS A  13      12.289  91.188 110.734  1.00 83.59           C  
ANISOU  176  C   LYS A  13    18687   7992   5080   -584   -306    552       C  
ATOM    177  O   LYS A  13      12.014  92.351 110.478  1.00 82.41           O  
ANISOU  177  O   LYS A  13    18247   7925   5139   -465   -154    259       O  
ATOM    178  CB  LYS A  13      11.158  89.985 112.610  1.00 93.37           C  
ANISOU  178  CB  LYS A  13    20739   9352   5385   -866    319    831       C  
ATOM    179  CG  LYS A  13       9.921  90.865 112.760  1.00112.46           C  
ANISOU  179  CG  LYS A  13    23058  12052   7620   -828   1080    610       C  
ATOM    180  CD  LYS A  13       8.682  90.324 111.983  1.00101.11           C  
ANISOU  180  CD  LYS A  13    21122  10807   6487  -1020   1728    834       C  
ATOM    181  CE  LYS A  13       8.775  90.589 110.511  1.00105.89           C  
ANISOU  181  CE  LYS A  13    21018  11358   7857   -960   1588    771       C  
ATOM    182  NZ  LYS A  13       7.499  90.291 109.758  1.00111.85           N1+
ANISOU  182  NZ  LYS A  13    21183  12293   9023  -1130   2176    921       N1+
ATOM    183  H   LYS A  13      12.286  92.575 112.858  1.00112.25           H  
ATOM    184  HA  LYS A  13      13.170  90.096 112.215  1.00107.97           H  
ATOM    185  HB2 LYS A  13      10.953  89.303 111.951  1.00112.04           H  
ATOM    186  HB3 LYS A  13      11.325  89.566 113.469  1.00112.04           H  
ATOM    187  HG2 LYS A  13       9.684  90.918 113.699  1.00134.95           H  
ATOM    188  HG3 LYS A  13      10.122  91.751 112.420  1.00134.95           H  
ATOM    189  HD2 LYS A  13       8.620  89.365 112.113  1.00121.33           H  
ATOM    190  HD3 LYS A  13       7.882  90.758 112.318  1.00121.33           H  
ATOM    191  HE2 LYS A  13       8.988  91.526 110.375  1.00127.07           H  
ATOM    192  HE3 LYS A  13       9.477  90.034 110.137  1.00127.07           H  
ATOM    193  HZ1 LYS A  13       7.610  90.466 108.892  1.00134.22           H  
ATOM    194  HZ2 LYS A  13       7.282  89.434 109.855  1.00134.22           H  
ATOM    195  HZ3 LYS A  13       6.836  90.795 110.072  1.00134.22           H  
ATOM    196  N   CYS A  14      12.479  90.242 109.804  1.00 52.77           N  
ANISOU  196  N   CYS A  14     9705   5061   5282    178  -1067    148       N  
ATOM    197  CA  CYS A  14      12.447  90.466 108.359  1.00 52.37           C  
ANISOU  197  CA  CYS A  14     9411   5032   5454     87   -966    212       C  
ATOM    198  C   CYS A  14      11.515  89.450 107.733  1.00 51.10           C  
ANISOU  198  C   CYS A  14     9241   5107   5067   -189   -709    288       C  
ATOM    199  O   CYS A  14      11.430  88.309 108.201  1.00 53.54           O  
ANISOU  199  O   CYS A  14     9748   5410   5183   -359   -645    347       O  
ATOM    200  CB  CYS A  14      13.834  90.310 107.737  1.00 71.65           C  
ANISOU  200  CB  CYS A  14    11834   7122   8267    113  -1071    339       C  
ATOM    201  SG  CYS A  14      15.106  91.554 108.185  1.00 76.98           S  
ANISOU  201  SG  CYS A  14    12429   7449   9373    358  -1479    377       S  
ATOM    202  H   CYS A  14      12.635  89.420 110.004  1.00 63.32           H  
ATOM    203  HA  CYS A  14      12.115  91.357 108.169  1.00 62.84           H  
ATOM    204  HB2 CYS A  14      14.183  89.442 107.995  1.00 85.98           H  
ATOM    205  HB3 CYS A  14      13.735  90.340 106.772  1.00 85.98           H  
ATOM    206  N   ALA A  15      10.746  89.901 106.747  1.00 46.94           N  
ANISOU  206  N   ALA A  15     8494   4785   4557   -245   -601    297       N  
ATOM    207  CA  ALA A  15       9.851  89.067 105.981  1.00 49.47           C  
ANISOU  207  CA  ALA A  15     8801   5283   4710   -533   -448    391       C  
ATOM    208  C   ALA A  15      10.191  89.236 104.513  1.00 54.74           C  
ANISOU  208  C   ALA A  15     9397   5822   5580   -530   -425    413       C  
ATOM    209  O   ALA A  15      10.530  90.342 104.082  1.00 50.69           O  
ANISOU  209  O   ALA A  15     8679   5282   5300   -320   -464    370       O  
ATOM    210  CB  ALA A  15       8.408  89.480 106.201  1.00 62.81           C  
ANISOU  210  CB  ALA A  15    10275   7400   6189   -591   -342    432       C  
ATOM    211  H   ALA A  15      10.730  90.725 106.499  1.00 56.33           H  
ATOM    212  HA  ALA A  15       9.961  88.136 106.231  1.00 59.36           H  
ATOM    213  HB1 ALA A  15       7.831  88.903 105.676  1.00 75.37           H  
ATOM    214  HB2 ALA A  15       8.195  89.391 107.143  1.00 75.37           H  
ATOM    215  HB3 ALA A  15       8.298  90.402 105.921  1.00 75.37           H  
ATOM    216  N   ILE A  16      10.012  88.174 103.724  1.00 48.52           N  
ANISOU  216  N   ILE A  16     8798   4958   4679   -750   -378    492       N  
ATOM    217  CA  ILE A  16      10.197  88.295 102.271  1.00 52.67           C  
ANISOU  217  CA  ILE A  16     9320   5379   5313   -697   -341    517       C  
ATOM    218  C   ILE A  16       8.926  88.843 101.658  1.00 50.06           C  
ANISOU  218  C   ILE A  16     8749   5362   4911   -833   -309    512       C  
ATOM    219  O   ILE A  16       7.837  88.321 101.906  1.00 56.06           O  
ANISOU  219  O   ILE A  16     9506   6334   5460  -1121   -323    581       O  
ATOM    220  CB  ILE A  16      10.546  86.931 101.647  1.00 61.75           C  
ANISOU  220  CB  ILE A  16    10892   6262   6310   -812   -346    588       C  
ATOM    221  CG1 ILE A  16      11.950  86.491 102.081  1.00 71.39           C  
ANISOU  221  CG1 ILE A  16    12313   7175   7636   -599   -337    636       C  
ATOM    222  CG2 ILE A  16      10.431  86.996 100.135  1.00 58.87           C  
ANISOU  222  CG2 ILE A  16    10599   5828   5941   -747   -314    611       C  
ATOM    223  CD1 ILE A  16      13.055  87.382 101.554  1.00 77.73           C  
ANISOU  223  CD1 ILE A  16    12916   7849   8770   -235   -291    712       C  
ATOM    224  H   ILE A  16       9.788  87.389 103.995  1.00 58.22           H  
ATOM    225  HA  ILE A  16      10.921  88.914 102.086  1.00 63.20           H  
ATOM    226  HB  ILE A  16       9.908  86.277 101.973  1.00 74.11           H  
ATOM    227 HG12 ILE A  16      11.996  86.501 103.050  1.00 85.67           H  
ATOM    228 HG13 ILE A  16      12.112  85.592 101.753  1.00 85.67           H  
ATOM    229 HG21 ILE A  16      10.655  86.128  99.764  1.00 70.65           H  
ATOM    230 HG22 ILE A  16       9.521  87.233  99.897  1.00 70.65           H  
ATOM    231 HG23 ILE A  16      11.046  87.667  99.800  1.00 70.65           H  
ATOM    232 HD11 ILE A  16      13.909  87.044 101.867  1.00 93.28           H  
ATOM    233 HD12 ILE A  16      13.030  87.375 100.584  1.00 93.28           H  
ATOM    234 HD13 ILE A  16      12.915  88.284 101.882  1.00 93.28           H  
ATOM    235  N   ILE A  17       9.050  89.846 100.813  1.00 48.12           N  
ANISOU  235  N   ILE A  17     8281   5147   4855   -641   -273    481       N  
ATOM    236  CA  ILE A  17       7.892  90.301 100.080  1.00 50.77           C  
ANISOU  236  CA  ILE A  17     8406   5759   5125   -766   -242    491       C  
ATOM    237  C   ILE A  17       8.132  90.401  98.527  1.00 49.66           C  
ANISOU  237  C   ILE A  17     8322   5482   5063   -670   -215    506       C  
ATOM    238  O   ILE A  17       9.279  90.549  98.112  1.00 52.49           O  
ANISOU  238  O   ILE A  17     8751   5592   5599   -393   -174    527       O  
ATOM    239  CB  ILE A  17       7.457  91.667 100.576  1.00 56.01           C  
ANISOU  239  CB  ILE A  17     8699   6693   5888   -596   -207    430       C  
ATOM    240  CG1 ILE A  17       8.528  92.704 100.245  1.00 52.91           C  
ANISOU  240  CG1 ILE A  17     8180   6107   5817   -263   -233    373       C  
ATOM    241  CG2 ILE A  17       7.185  91.687 102.099  1.00 64.36           C  
ANISOU  241  CG2 ILE A  17     9751   7896   6807   -578   -216    416       C  
ATOM    242  CD1 ILE A  17       8.102  94.101 100.598  1.00 57.52           C  
ANISOU  242  CD1 ILE A  17     8470   6894   6491    -80   -252    296       C  
ATOM    243  H   ILE A  17       9.779  90.273 100.648  1.00 57.74           H  
ATOM    244  HA  ILE A  17       7.162  89.681 100.230  1.00 60.92           H  
ATOM    245  HB  ILE A  17       6.640  91.913 100.116  1.00 67.21           H  
ATOM    246 HG12 ILE A  17       9.333  92.499 100.745  1.00 63.49           H  
ATOM    247 HG13 ILE A  17       8.711  92.677  99.293  1.00 63.49           H  
ATOM    248 HG21 ILE A  17       6.912  92.580 102.359  1.00 77.23           H  
ATOM    249 HG22 ILE A  17       6.479  91.052 102.301  1.00 77.23           H  
ATOM    250 HG23 ILE A  17       7.997  91.439 102.568  1.00 77.23           H  
ATOM    251 HD11 ILE A  17       8.816  94.716 100.368  1.00 69.02           H  
ATOM    252 HD12 ILE A  17       7.300  94.323 100.099  1.00 69.02           H  
ATOM    253 HD13 ILE A  17       7.922  94.145 101.550  1.00 69.02           H  
HETATM  254  N   SAR A  18       7.037  90.367  97.735  1.00 57.11           N  
ANISOU  254  N   SAR A  18     9210   6609   5878   -876   -241    537       N  
HETATM  255  CA  SAR A  18       7.042  90.635  96.267  1.00 53.26           C  
ANISOU  255  CA  SAR A  18     8760   6050   5426   -762   -222    539       C  
HETATM  256  C   SAR A  18       6.663  91.965  96.064  1.00 56.04           C  
ANISOU  256  C   SAR A  18     8682   6659   5951   -624   -145    506       C  
HETATM  257  O   SAR A  18       5.795  92.542  96.672  1.00 58.06           O  
ANISOU  257  O   SAR A  18     8641   7229   6191   -726   -132    505       O  
HETATM  258  CN  SAR A  18       5.680  90.074  98.223  1.00 54.96           C  
ANISOU  258  CN  SAR A  18     8812   6647   5424  -1229   -299    625       C  
HETATM  259  HN1 SAR A  18       5.364  89.230  97.827  1.00 65.95           H  
HETATM  260  HN2 SAR A  18       5.074  90.805  97.965  1.00 65.95           H  
HETATM  261  HN3 SAR A  18       5.695  89.991  99.197  1.00 65.95           H  
HETATM  262  HA2 SAR A  18       7.765  90.324  95.705  1.00 63.91           H  
HETATM  263  HA3 SAR A  18       6.231  90.112  96.055  1.00 63.91           H  
ATOM    264  N   LEU A  19       7.380  92.639  95.199  1.00 48.33           N  
ANISOU  264  N   LEU A  19     7627   5566   5170   -314    -65    503       N  
ATOM    265  CA  LEU A  19       6.931  93.934  94.757  1.00 44.22           C  
ANISOU  265  CA  LEU A  19     6710   5280   4811   -191     -6    478       C  
ATOM    266  C   LEU A  19       6.571  93.797  93.280  1.00 59.49           C  
ANISOU  266  C   LEU A  19     8756   7195   6654   -181      9    510       C  
ATOM    267  O   LEU A  19       7.429  93.472  92.439  1.00 49.82           O  
ANISOU  267  O   LEU A  19     7777   5708   5445     63     64    563       O  
ATOM    268  CB  LEU A  19       7.997  94.944  94.923  1.00 46.82           C  
ANISOU  268  CB  LEU A  19     6816   5495   5477    150     37    491       C  
ATOM    269  CG  LEU A  19       8.382  95.198  96.399  1.00 55.92           C  
ANISOU  269  CG  LEU A  19     7911   6620   6717    169    -50    442       C  
ATOM    270  CD1 LEU A  19       9.670  95.968  96.423  1.00 70.78           C  
ANISOU  270  CD1 LEU A  19     9649   8267   8975    467   -100    525       C  
ATOM    271  CD2 LEU A  19       7.245  95.997  97.073  1.00 65.43           C  
ANISOU  271  CD2 LEU A  19     8875   8161   7823     97    -63    349       C  
ATOM    272  H   LEU A  19       8.123  92.375  94.856  1.00 58.00           H  
ATOM    273  HA  LEU A  19       6.146  94.209  95.256  1.00 53.06           H  
ATOM    274  HB2 LEU A  19       8.791  94.640  94.457  1.00 56.18           H  
ATOM    275  HB3 LEU A  19       7.694  95.784  94.546  1.00 56.18           H  
ATOM    276  HG  LEU A  19       8.502  94.356  96.865  1.00 67.11           H  
ATOM    277 HD11 LEU A  19       9.922  96.134  97.345  1.00 84.93           H  
ATOM    278 HD12 LEU A  19      10.358  95.446  95.980  1.00 84.93           H  
ATOM    279 HD13 LEU A  19       9.543  96.810  95.958  1.00 84.93           H  
ATOM    280 HD21 LEU A  19       7.481  96.159  98.000  1.00 78.51           H  
ATOM    281 HD22 LEU A  19       7.133  96.840  96.607  1.00 78.51           H  
ATOM    282 HD23 LEU A  19       6.426  95.480  97.025  1.00 78.51           H  
ATOM    283  N   MET A  20       5.316  94.042  92.964  1.00 48.04           N  
ANISOU  283  N   MET A  20     7137   6024   5091   -409    -36    508       N  
ATOM    284  CA  MET A  20       4.786  93.676  91.655  1.00 58.06           C  
ANISOU  284  CA  MET A  20     8607   7252   6202   -493   -111    536       C  
ATOM    285  C   MET A  20       4.703  94.917  90.799  1.00 53.81           C  
ANISOU  285  C   MET A  20     7734   6868   5843   -242      9    524       C  
ATOM    286  O   MET A  20       4.199  95.943  91.265  1.00 58.89           O  
ANISOU  286  O   MET A  20     7945   7805   6627   -237     73    506       O  
ATOM    287  CB  MET A  20       3.415  93.036  91.790  1.00 58.56           C  
ANISOU  287  CB  MET A  20     8698   7506   6047   -968   -302    613       C  
ATOM    288  CG  MET A  20       2.704  92.931  90.445  1.00 81.62           C  
ANISOU  288  CG  MET A  20    11753  10417   8840  -1079   -444    648       C  
ATOM    289  SD  MET A  20       1.503  91.582  90.527  1.00 86.88           S  
ANISOU  289  SD  MET A  20    12707  11061   9244  -1697   -825    813       S  
ATOM    290  CE  MET A  20       0.927  91.731  92.236  1.00 91.33           C  
ANISOU  290  CE  MET A  20    12792  12015   9893  -1923   -720    951       C  
ATOM    291  H   MET A  20       4.744  94.418  93.485  1.00 57.65           H  
ATOM    292  HA  MET A  20       5.381  93.035  91.235  1.00 69.67           H  
ATOM    293  HB2 MET A  20       3.514  92.141  92.150  1.00 70.28           H  
ATOM    294  HB3 MET A  20       2.867  93.576  92.380  1.00 70.28           H  
ATOM    295  HG2 MET A  20       2.233  93.758  90.257  1.00 97.94           H  
ATOM    296  HG3 MET A  20       3.349  92.735  89.747  1.00 97.94           H  
ATOM    297  HE1 MET A  20       0.264  91.045  92.406  1.00109.59           H  
ATOM    298  HE2 MET A  20       1.683  91.617  92.834  1.00109.59           H  
ATOM    299  HE3 MET A  20       0.535  92.609  92.361  1.00109.59           H  
ATOM    300  N   VAL A  21       5.223  94.833  89.570  1.00 49.95           N  
ANISOU  300  N   VAL A  21     7474   6175   5330     13     52    545       N  
ATOM    301  CA  VAL A  21       5.046  95.918  88.563  1.00 44.67           C  
ANISOU  301  CA  VAL A  21     6521   5654   4800    241    159    557       C  
ATOM    302  C   VAL A  21       4.488  95.276  87.277  1.00 45.49           C  
ANISOU  302  C   VAL A  21     7016   5654   4616    179     34    562       C  
ATOM    303  O   VAL A  21       5.239  94.781  86.452  1.00 50.64           O  
ANISOU  303  O   VAL A  21     8081   6017   5145    484     76    595       O  
ATOM    304  CB  VAL A  21       6.372  96.630  88.250  1.00 53.58           C  
ANISOU  304  CB  VAL A  21     7503   6633   6221    723    356    641       C  
ATOM    305  CG1 VAL A  21       6.130  97.786  87.219  1.00 67.82           C  
ANISOU  305  CG1 VAL A  21     8981   8606   8180    947    466    676       C  
ATOM    306  CG2 VAL A  21       7.050  97.141  89.523  1.00 71.67           C  
ANISOU  306  CG2 VAL A  21     9516   8921   8795    766    373    650       C  
ATOM    307  H   VAL A  21       5.683  94.164  89.285  1.00 59.94           H  
ATOM    308  HA  VAL A  21       4.408  96.571  88.890  1.00 53.61           H  
ATOM    309  HB  VAL A  21       6.974  95.992  87.836  1.00 64.29           H  
ATOM    310 HG11 VAL A  21       6.975  98.225  87.033  1.00 81.38           H  
ATOM    311 HG12 VAL A  21       5.765  97.410  86.403  1.00 81.38           H  
ATOM    312 HG13 VAL A  21       5.504  98.422  87.600  1.00 81.38           H  
ATOM    313 HG21 VAL A  21       7.880  97.582  89.283  1.00 86.00           H  
ATOM    314 HG22 VAL A  21       6.457  97.768  89.966  1.00 86.00           H  
ATOM    315 HG23 VAL A  21       7.231  96.388  90.107  1.00 86.00           H  
TER
HETATM  316  N   ORN B   1      13.316  98.944 106.825  1.00 55.41           N  
ANISOU  316  N   ORN B   1     9961   4837   6256    863   -730   -654       N  
HETATM  317  CA  ORN B   1      13.851  99.193 105.468  1.00 55.78           C  
ANISOU  317  CA  ORN B   1     9589   4958   6648    563   -743   -532       C  
HETATM  318  C   ORN B   1      13.678  97.941 104.635  1.00 58.55           C  
ANISOU  318  C   ORN B   1    10068   5319   6858    778   -649   -170       C  
HETATM  319  O   ORN B   1      13.508  96.804 105.117  1.00 60.99           O  
ANISOU  319  O   ORN B   1    10718   5668   6788   1193   -595    -68       O  
HETATM  320  CB  ORN B   1      15.386  99.508 105.492  1.00 53.76           C  
ANISOU  320  CB  ORN B   1     8860   5227   6340    515  -1037   -907       C  
HETATM  321  CG  ORN B   1      15.768 100.913 105.917  1.00 59.24           C  
ANISOU  321  CG  ORN B   1     9249   5921   7340    117  -1064  -1357       C  
HETATM  322  CD  ORN B   1      15.350 102.011 104.882  1.00 66.32           C  
ANISOU  322  CD  ORN B   1     9970   6352   8875   -395   -739  -1187       C  
HETATM  323  NE  ORN B   1      16.112 101.886 103.620  1.00 58.02           N  
ANISOU  323  NE  ORN B   1     8585   5442   8017   -528   -718  -1037       N  
HETATM  324  HA  ORN B   1      13.244  99.990 105.028  1.00 66.94           H  
HETATM  325  HB2 ORN B   1      15.787  99.358 104.480  1.00 64.51           H  
HETATM  326  HB3 ORN B   1      15.864  98.810 106.193  1.00 64.51           H  
HETATM  327  HG2 ORN B   1      15.293 101.132 106.880  1.00 71.09           H  
HETATM  328  HG3 ORN B   1      16.855 100.955 106.046  1.00 71.09           H  
HETATM  329  HD2 ORN B   1      14.283 101.904 104.666  1.00 79.58           H  
HETATM  330  HD3 ORN B   1      15.559 102.994 105.315  1.00 79.58           H  
HETATM  331  HE1 ORN B   1      17.033 102.320 103.625  1.00 69.62           H  
HETATM  332  H1  ORN B   1      12.398  98.491 106.822  1.00 66.49           H  
HETATM  333  H2  ORN B   1      13.915  98.338 107.391  1.00 66.49           H  
HETATM  334  H3  ORN B   1      13.197  99.798 107.376  1.00 66.49           H  
ATOM    335  N   LEU B   2      13.781  98.172 103.312  1.00 54.07           N  
ANISOU  335  N   LEU B   2     9226   4712   6607    486   -579     17       N  
ATOM    336  CA  LEU B   2      13.722  97.082 102.317  1.00 46.66           C  
ANISOU  336  CA  LEU B   2     8333   3824   5572    593   -479    299       C  
ATOM    337  C   LEU B   2      15.135  96.692 102.004  1.00 53.41           C  
ANISOU  337  C   LEU B   2     8898   5110   6286    707   -660    186       C  
ATOM    338  O   LEU B   2      15.999  97.582 101.939  1.00 52.68           O  
ANISOU  338  O   LEU B   2     8433   5201   6384    491   -804    -44       O  
ATOM    339  CB  LEU B   2      13.034  97.575 101.051  1.00 54.51           C  
ANISOU  339  CB  LEU B   2     9195   4601   6916    248   -319    557       C  
ATOM    340  CG  LEU B   2      11.626  98.118 101.265  1.00 57.45           C  
ANISOU  340  CG  LEU B   2     9614   4710   7506    125   -142    645       C  
ATOM    341  CD1 LEU B   2      11.052  98.631  99.987  1.00 56.01           C  
ANISOU  341  CD1 LEU B   2     9047   4618   7616    -99    -34    864       C  
ATOM    342  CD2 LEU B   2      10.707  97.015 101.872  1.00 54.77           C  
ANISOU  342  CD2 LEU B   2     9338   4514   6957    330      3    604       C  
ATOM    343  H   LEU B   2      13.934  98.946 102.969  1.00 64.89           H  
ATOM    344  HA  LEU B   2      13.243  96.317 102.674  1.00 55.99           H  
ATOM    345  HB2 LEU B   2      13.569  98.287 100.666  1.00 65.41           H  
ATOM    346  HB3 LEU B   2      12.973  96.837 100.424  1.00 65.41           H  
ATOM    347  HG  LEU B   2      11.664  98.855 101.894  1.00 68.94           H  
ATOM    348 HD11 LEU B   2      10.158  98.968 100.156  1.00 67.21           H  
ATOM    349 HD12 LEU B   2      11.617  99.344  99.651  1.00 67.21           H  
ATOM    350 HD13 LEU B   2      11.016  97.905  99.344  1.00 67.21           H  
ATOM    351 HD21 LEU B   2       9.818  97.381 102.000  1.00 65.72           H  
ATOM    352 HD22 LEU B   2      10.671  96.263 101.261  1.00 65.72           H  
ATOM    353 HD23 LEU B   2      11.075  96.732 102.724  1.00 65.72           H  
ATOM    354  N   VAL B   3      15.393  95.415 101.804  1.00 51.90           N  
ANISOU  354  N   VAL B   3     9688   5417   4614   1506   -273   1278       N  
ATOM    355  CA  VAL B   3      16.691  95.006 101.338  1.00 57.59           C  
ANISOU  355  CA  VAL B   3    10158   6434   5289   1572   -470   1356       C  
ATOM    356  C   VAL B   3      16.434  94.283 100.039  1.00 54.66           C  
ANISOU  356  C   VAL B   3     9882   6008   4878   1513   -259   1349       C  
ATOM    357  O   VAL B   3      15.777  93.248 100.061  1.00 54.80           O  
ANISOU  357  O   VAL B   3    10148   5633   5040   1545    355   1242       O  
ATOM    358  CB  VAL B   3      17.423  94.100 102.260  1.00 63.25           C  
ANISOU  358  CB  VAL B   3    11094   6994   5945   1905   -260   1466       C  
ATOM    359  CG1 VAL B   3      18.794  93.746 101.563  1.00 64.72           C  
ANISOU  359  CG1 VAL B   3    10960   7483   6147   1990   -469   1605       C  
ATOM    360  CG2 VAL B   3      17.639  94.744 103.646  1.00 69.35           C  
ANISOU  360  CG2 VAL B   3    11913   7794   6645   1878   -438   1506       C  
ATOM    361  HA  VAL B   3      17.240  95.786 101.162  1.00 69.11           H  
ATOM    362  HB  VAL B   3      16.918  93.280 102.378  1.00 75.90           H  
ATOM    363 HG11 VAL B   3      19.298  93.153 102.142  1.00 77.67           H  
ATOM    364 HG12 VAL B   3      18.613  93.308 100.717  1.00 77.67           H  
ATOM    365 HG13 VAL B   3      19.292  94.564 101.413  1.00 77.67           H  
ATOM    366 HG21 VAL B   3      18.119  94.120 104.213  1.00 83.23           H  
ATOM    367 HG22 VAL B   3      18.156  95.558 103.538  1.00 83.23           H  
ATOM    368 HG23 VAL B   3      16.775  94.950 104.036  1.00 83.23           H  
ATOM    369  H   VAL B   3      14.800  94.793 101.778  1.00 62.28           H  
ATOM    370  N   PHE B   4      17.020  94.755  98.949  1.00 51.04           N  
ANISOU  370  N   PHE B   4     9013   6006   4375   1246   -670   1311       N  
ATOM    371  CA  PHE B   4      17.005  94.100  97.645  1.00 54.65           C  
ANISOU  371  CA  PHE B   4     9153   6599   5011    868   -414   1048       C  
ATOM    372  C   PHE B   4      18.306  93.323  97.421  1.00 49.92           C  
ANISOU  372  C   PHE B   4     8517   6080   4369   1159   -269   1112       C  
ATOM    373  O   PHE B   4      19.301  93.502  98.141  1.00 59.99           O  
ANISOU  373  O   PHE B   4     9867   7443   5483   1602   -552   1417       O  
ATOM    374  CB  PHE B   4      16.830  95.101  96.525  1.00 58.08           C  
ANISOU  374  CB  PHE B   4     9109   7503   5454    294   -920    934       C  
ATOM    375  CG  PHE B   4      15.521  95.841  96.581  1.00 50.51           C  
ANISOU  375  CG  PHE B   4     8068   6460   4664     -1  -1044    910       C  
ATOM    376  CD2 PHE B   4      14.428  95.354  95.876  1.00 55.43           C  
ANISOU  376  CD2 PHE B   4     8544   6979   5538   -463   -710    709       C  
ATOM    377  CD1 PHE B   4      15.394  96.988  97.308  1.00 66.83           C  
ANISOU  377  CD1 PHE B   4    10191   8539   6664    157  -1462   1099       C  
ATOM    378  CE2 PHE B   4      13.227  96.009  95.904  1.00 59.23           C  
ANISOU  378  CE2 PHE B   4     8849   7391   6264   -713   -822    750       C  
ATOM    379  CE1 PHE B   4      14.218  97.637  97.358  1.00 50.00           C  
ANISOU  379  CE1 PHE B   4     7943   6275   4781    -54  -1497   1097       C  
ATOM    380  CZ  PHE B   4      13.126  97.150  96.660  1.00 53.48           C  
ANISOU  380  CZ  PHE B   4     8151   6632   5539   -464  -1188    948       C  
ATOM    381  H   PHE B   4      17.457  95.495  98.939  1.00 61.25           H  
ATOM    382  HA  PHE B   4      16.266  93.472  97.610  1.00 65.57           H  
ATOM    383  HB2 PHE B   4      17.544  95.755  96.575  1.00 69.69           H  
ATOM    384  HB3 PHE B   4      16.870  94.633  95.677  1.00 69.69           H  
ATOM    385  HD2 PHE B   4      14.514  94.575  95.375  1.00 66.52           H  
ATOM    386  HD1 PHE B   4      16.122  97.315  97.786  1.00 80.20           H  
ATOM    387  HE2 PHE B   4      12.493  95.681  95.437  1.00 71.07           H  
ATOM    388  HE1 PHE B   4      14.139  98.416  97.859  1.00 60.00           H  
ATOM    389  HZ  PHE B   4      12.319  97.610  96.692  1.00 64.18           H  
ATOM    390  N   PHE B   5      18.266  92.418  96.454  1.00 54.35           N  
ANISOU  390  N   PHE B   5     8976   6579   5096    895    216    837       N  
ATOM    391  CA  PHE B   5      19.408  91.553  96.240  1.00 54.78           C  
ANISOU  391  CA  PHE B   5     9004   6590   5220   1212    531    874       C  
ATOM    392  C   PHE B   5      19.842  91.542  94.794  1.00 57.93           C  
ANISOU  392  C   PHE B   5     9029   7340   5641    711    569    584       C  
ATOM    393  O   PHE B   5      19.041  91.645  93.848  1.00 52.85           O  
ANISOU  393  O   PHE B   5     8282   6807   4990     46    633    274       O  
ATOM    394  CB  PHE B   5      19.145  90.153  96.723  1.00 64.06           C  
ANISOU  394  CB  PHE B   5    10595   7152   6591   1544   1321    843       C  
ATOM    395  CG  PHE B   5      18.821  90.095  98.151  1.00 62.55           C  
ANISOU  395  CG  PHE B   5    10817   6616   6332   2017   1312   1144       C  
ATOM    396  CD2 PHE B   5      19.818  89.851  99.113  1.00 76.11           C  
ANISOU  396  CD2 PHE B   5    12685   8238   7996   2660   1195   1569       C  
ATOM    397  CD1 PHE B   5      17.529  90.314  98.568  1.00 76.73           C  
ANISOU  397  CD1 PHE B   5    12843   8197   8112   1798   1404   1041       C  
ATOM    398  CE2 PHE B   5      19.495  89.814 100.459  1.00 75.53           C  
ANISOU  398  CE2 PHE B   5    13069   7853   7775   3011   1171   1856       C  
ATOM    399  CE1 PHE B   5      17.206  90.274  99.902  1.00 82.75           C  
ANISOU  399  CE1 PHE B   5    14044   8625   8773   2184   1457   1287       C  
ATOM    400  CZ  PHE B   5      18.185  90.031 100.849  1.00 77.90           C  
ANISOU  400  CZ  PHE B   5    13630   7935   8033   2743   1327   1664       C  
ATOM    401  H   PHE B   5      17.605  92.288  95.920  1.00 65.22           H  
ATOM    402  HA  PHE B   5      20.151  91.899  96.759  1.00 65.73           H  
ATOM    403  HB2 PHE B   5      18.394  89.785  96.231  1.00 76.87           H  
ATOM    404  HB3 PHE B   5      19.936  89.613  96.573  1.00 76.87           H  
ATOM    405  HD2 PHE B   5      20.697  89.708  98.844  1.00 91.34           H  
ATOM    406  HD1 PHE B   5      16.864  90.480  97.938  1.00 92.07           H  
ATOM    407  HE2 PHE B   5      20.152  89.648 101.095  1.00 90.63           H  
ATOM    408  HE1 PHE B   5      16.327  90.419 100.171  1.00 99.30           H  
ATOM    409  HZ  PHE B   5      17.961  90.004 101.751  1.00 93.48           H  
ATOM    410  N   ALA B   6      21.144  91.450  94.635  1.00 52.10           N  
ANISOU  410  N   ALA B   6     8073   6803   4918   1004    504    719       N  
ATOM    411  CA  ALA B   6      21.753  91.424  93.326  1.00 53.13           C  
ANISOU  411  CA  ALA B   6     7869   7262   5055    577    601    454       C  
ATOM    412  C   ALA B   6      22.970  90.523  93.361  1.00 57.80           C  
ANISOU  412  C   ALA B   6     8390   7688   5885   1102   1078    558       C  
ATOM    413  O   ALA B   6      23.613  90.370  94.405  1.00 59.62           O  
ANISOU  413  O   ALA B   6     8660   7786   6207   1792    962    979       O  
ATOM    414  CB  ALA B   6      22.191  92.807  92.878  1.00 49.95           C  
ANISOU  414  CB  ALA B   6     7064   7506   4409    248   -225    541       C  
ATOM    415  H   ALA B   6      21.708  91.401  95.283  1.00 62.52           H  
ATOM    416  HA  ALA B   6      21.123  91.071  92.678  1.00 63.76           H  
ATOM    417  HB1 ALA B   6      22.592  92.741  91.998  1.00 59.94           H  
ATOM    418  HB2 ALA B   6      21.415  93.388  92.846  1.00 59.94           H  
ATOM    419  HB3 ALA B   6      22.838  93.154  93.512  1.00 59.94           H  
ATOM    420  N   GLU B   7      23.265  89.929  92.213  1.00 58.44           N  
ANISOU  420  N   GLU B   7     8370   7764   6072    744   1627    191       N  
ATOM    421  CA  GLU B   7      24.513  89.250  91.965  1.00 63.34           C  
ANISOU  421  CA  GLU B   7     8789   8304   6972   1149   2093    243       C  
ATOM    422  C   GLU B   7      25.489  90.295  91.440  1.00 62.09           C  
ANISOU  422  C   GLU B   7     8103   8827   6663    973   1471    345       C  
ATOM    423  O   GLU B   7      25.244  90.913  90.399  1.00 60.05           O  
ANISOU  423  O   GLU B   7     7705   8960   6151    225   1261     28       O  
ATOM    424  CB  GLU B   7      24.305  88.131  90.940  1.00 67.49           C  
ANISOU  424  CB  GLU B   7     9532   8452   7661    765   3083   -273       C  
ATOM    425  CG  GLU B   7      24.818  86.762  91.305  1.00 94.09           C  
ANISOU  425  CG  GLU B   7    13103  11163  11485   1421   3985   -208       C  
ATOM    426  CD  GLU B   7      25.215  85.955  90.066  1.00111.67           C  
ANISOU  426  CD  GLU B   7    15360  13190  13880   1049   4907   -710       C  
ATOM    427  OE1 GLU B   7      24.791  86.331  88.944  1.00107.93           O  
ANISOU  427  OE1 GLU B   7    14898  13033  13077    145   4885  -1167       O  
ATOM    428  OE2 GLU B   7      25.977  84.963  90.206  1.00110.23           O1-
ANISOU  428  OE2 GLU B   7    15192  12527  14162   1644   5660   -631       O1-
ATOM    429  H   GLU B   7      22.731  89.909  91.539  1.00 70.13           H  
ATOM    430  HA  GLU B   7      24.860  88.871  92.788  1.00 76.00           H  
ATOM    431  HB2 GLU B   7      23.352  88.044  90.778  1.00 80.99           H  
ATOM    432  HB3 GLU B   7      24.746  88.391  90.116  1.00 80.99           H  
ATOM    433  HG2 GLU B   7      25.601  86.855  91.869  1.00112.91           H  
ATOM    434  HG3 GLU B   7      24.123  86.274  91.774  1.00112.91           H  
ATOM    435  N   ASP B   8      26.570  90.517  92.157  1.00 63.62           N  
ANISOU  435  N   ASP B   8     8005   9183   6986   1607   1135    816       N  
ATOM    436  CA  ASP B   8      27.605  91.459  91.746  1.00 63.16           C  
ANISOU  436  CA  ASP B   8     7419   9768   6811   1484    560    961       C  
ATOM    437  C   ASP B   8      28.731  90.698  91.053  1.00 72.52           C  
ANISOU  437  C   ASP B   8     8269  10906   8380   1685   1241    873       C  
ATOM    438  O   ASP B   8      29.428  89.893  91.688  1.00 74.00           O  
ANISOU  438  O   ASP B   8     8365  10761   8989   2431   1614   1210       O  
ATOM    439  CB  ASP B   8      28.142  92.232  92.948  1.00 64.27           C  
ANISOU  439  CB  ASP B   8     7414  10172   6836   1976   -272   1558       C  
ATOM    440  CG  ASP B   8      28.980  93.435  92.544  1.00 78.15           C  
ANISOU  440  CG  ASP B   8     8689  12644   8360   1685  -1011   1683       C  
ATOM    441  OD1 ASP B   8      29.309  93.544  91.348  1.00 85.91           O  
ANISOU  441  OD1 ASP B   8     9402  13900   9340   1206   -801   1345       O  
ATOM    442  OD2 ASP B   8      29.311  94.271  93.419  1.00 87.05           O1-
ANISOU  442  OD2 ASP B   8     9747  14054   9274   1886  -1783   2107       O1-
ATOM    443  H   ASP B   8      26.737  90.127  92.905  1.00 76.35           H  
ATOM    444  HA  ASP B   8      27.231  92.095  91.116  1.00 75.79           H  
ATOM    445  HB2 ASP B   8      27.396  92.550  93.480  1.00 77.13           H  
ATOM    446  HB3 ASP B   8      28.701  91.642  93.479  1.00 77.13           H  
ATOM    447  N   CYS B   9      28.940  90.995  89.773  1.00 82.80           N  
ANISOU  447  N   CYS B   9     9368  12544   9548   1021   1387    459       N  
ATOM    448  CA  CYS B   9      29.783  90.193  88.891  1.00 90.98           C  
ANISOU  448  CA  CYS B   9    10193  13447  10928   1034   2259    195       C  
ATOM    449  C   CYS B   9      30.971  91.027  88.444  1.00 87.67           C  
ANISOU  449  C   CYS B   9     9157  13680  10475    942   1828    349       C  
ATOM    450  O   CYS B   9      30.796  92.054  87.782  1.00 92.13           O  
ANISOU  450  O   CYS B   9     9627  14782  10596    228   1259    169       O  
ATOM    451  CB  CYS B   9      28.988  89.709  87.668  1.00 86.91           C  
ANISOU  451  CB  CYS B   9    10063  12730  10230    195   2951   -501       C  
ATOM    452  SG  CYS B   9      27.298  89.071  88.057  1.00 89.64           S  
ANISOU  452  SG  CYS B   9    11128  12490  10442    -16   3206   -721       S  
ATOM    453  H   CYS B   9      28.594  91.678  89.381  1.00 99.36           H  
ATOM    454  HA  CYS B   9      30.112  89.418  89.372  1.00109.17           H  
ATOM    455  HB2 CYS B   9      28.887  90.450  87.050  1.00104.29           H  
ATOM    456  HB3 CYS B   9      29.482  88.992  87.241  1.00104.29           H  
ATOM    457  HG  CYS B   9      26.658  89.946  88.571  1.00107.57           H  
ATOM    458  N   GLY B  10      32.167  90.584  88.797  1.00109.13           N  
ANISOU  458  N   GLY B  10    11433  16347  13684   1652   2095    712       N  
ATOM    459  CA  GLY B  10      33.397  91.159  88.303  1.00 97.20           C  
ANISOU  459  CA  GLY B  10     9275  15398  12261   1601   1893    841       C  
ATOM    460  C   GLY B  10      33.995  90.299  87.215  1.00112.28           C  
ANISOU  460  C   GLY B  10    11037  17068  14555   1487   3032    408       C  
ATOM    461  O   GLY B  10      33.290  89.539  86.540  1.00110.43           O  
ANISOU  461  O   GLY B  10    11297  16372  14291   1097   3853   -149       O  
ATOM    462  H   GLY B  10      32.291  89.930  89.341  1.00130.96           H  
ATOM    463  HA2 GLY B  10      33.225  92.043  87.943  1.00116.65           H  
ATOM    464  HA3 GLY B  10      34.038  91.236  89.027  1.00116.65           H  
ATOM    465  N   SER B  11      35.319  90.403  87.050  1.00118.90           N  
ANISOU  465  N   SER B  11    11195  18211  15769   1810   3125    666       N  
ATOM    466  CA  SER B  11      35.984  89.661  85.983  1.00130.78           C  
ANISOU  466  CA  SER B  11    12517  19500  17675   1695   4278    238       C  
ATOM    467  C   SER B  11      35.675  88.172  86.075  1.00140.98           C  
ANISOU  467  C   SER B  11    14211  19866  19488   2162   5461     40       C  
ATOM    468  O   SER B  11      35.412  87.517  85.058  1.00144.36           O  
ANISOU  468  O   SER B  11    15005  19930  19916   1662   6476   -625       O  
ATOM    469  CB  SER B  11      37.492  89.886  86.042  1.00126.09           C  
ANISOU  469  CB  SER B  11    11037  19297  17575   2188   4228    687       C  
ATOM    470  OG  SER B  11      38.040  89.314  87.218  1.00134.31           O  
ANISOU  470  OG  SER B  11    11743  20042  19247   3262   4175   1404       O  
ATOM    471  H   SER B  11      35.841  90.887  87.532  1.00142.68           H  
ATOM    472  HA  SER B  11      35.664  89.983  85.125  1.00156.94           H  
ATOM    473  HB2 SER B  11      37.904  89.471  85.268  1.00151.31           H  
ATOM    474  HB3 SER B  11      37.670  90.839  86.042  1.00151.31           H  
ATOM    475  HG  SER B  11      38.870  89.443  87.241  1.00161.18           H  
ATOM    476  N   ASN B  12      35.710  87.619  87.284  1.00141.14           N  
ANISOU  476  N   ASN B  12    14213  19483  19932   3077   5359    615       N  
ATOM    477  CA  ASN B  12      35.473  86.198  87.480  1.00137.04           C  
ANISOU  477  CA  ASN B  12    14066  18041  19960   3605   6452    517       C  
ATOM    478  C   ASN B  12      34.446  85.997  88.590  1.00137.35           C  
ANISOU  478  C   ASN B  12    14650  17740  19799   3883   5992    787       C  
ATOM    479  O   ASN B  12      33.426  85.332  88.378  1.00135.29           O  
ANISOU  479  O   ASN B  12    15081  16938  19387   3572   6565    328       O  
ATOM    480  CB  ASN B  12      36.789  85.489  87.804  1.00149.99           C  
ANISOU  480  CB  ASN B  12    15035  19410  22545   4593   7034   1030       C  
ATOM    481  CG  ASN B  12      37.923  85.873  86.841  1.00151.83           C  
ANISOU  481  CG  ASN B  12    14581  20105  23001   4371   7346    874       C  
ATOM    482  ND2 ASN B  12      39.165  85.775  87.312  1.00151.60           N  
ANISOU  482  ND2 ASN B  12    13827  20184  23589   5081   7143   1505       N  
ATOM    483  OD1 ASN B  12      37.679  86.251  85.693  1.00153.44           O  
ANISOU  483  OD1 ASN B  12    14999  20565  22735   3445   7607    183       O  
ATOM    484  H   ASN B  12      35.871  88.051  88.010  1.00169.37           H  
ATOM    485  HA  ASN B  12      35.116  85.818  86.663  1.00164.44           H  
ATOM    486  HB2 ASN B  12      37.065  85.729  88.702  1.00179.99           H  
ATOM    487  HB3 ASN B  12      36.656  84.530  87.742  1.00179.99           H  
ATOM    488 HD21 ASN B  12      39.833  85.979  86.810  1.00181.92           H  
ATOM    489 HD22 ASN B  12      39.299  85.508  88.118  1.00181.92           H  
ATOM    490  N   LYS B  13      34.680  86.608  89.754  1.00133.42           N  
ANISOU  490  N   LYS B  13    13875  17581  19239   4377   4949   1510       N  
ATOM    491  CA  LYS B  13      33.877  86.322  90.941  1.00126.62           C  
ANISOU  491  CA  LYS B  13    13495  16343  18271   4764   4601   1853       C  
ATOM    492  C   LYS B  13      32.466  86.890  90.814  1.00116.84           C  
ANISOU  492  C   LYS B  13    12890  15212  16292   3976   4175   1403       C  
ATOM    493  O   LYS B  13      32.256  87.975  90.264  1.00100.09           O  
ANISOU  493  O   LYS B  13    10676  13707  13644   3270   3548   1162       O  
ATOM    494  CB  LYS B  13      34.515  86.912  92.200  1.00124.56           C  
ANISOU  494  CB  LYS B  13    12821  16470  18037   5372   3560   2730       C  
ATOM    495  CG  LYS B  13      36.026  86.833  92.305  1.00144.54           C  
ANISOU  495  CG  LYS B  13    14492  19241  21186   5996   3554   3308       C  
ATOM    496  CD  LYS B  13      36.496  87.852  93.331  1.00139.99           C  
ANISOU  496  CD  LYS B  13    13566  19320  20305   6168   2238   4040       C  
ATOM    497  CE  LYS B  13      37.830  87.480  93.969  1.00150.00           C  
ANISOU  497  CE  LYS B  13    14371  20563  22060   6601   2026   4640       C  
ATOM    498  NZ  LYS B  13      37.969  88.141  95.304  1.00145.61           N1+
ANISOU  498  NZ  LYS B  13    14053  20271  21003   6407    843   5066       N1+
ATOM    499  H   LYS B  13      35.299  87.191  89.881  1.00160.11           H  
ATOM    500  HA  LYS B  13      33.808  85.362  91.056  1.00151.94           H  
ATOM    501  HB2 LYS B  13      34.274  87.850  92.249  1.00149.47           H  
ATOM    502  HB3 LYS B  13      34.151  86.447  92.969  1.00149.47           H  
ATOM    503  HG2 LYS B  13      36.290  85.947  92.600  1.00173.45           H  
ATOM    504  HG3 LYS B  13      36.428  87.044  91.447  1.00173.45           H  
ATOM    505  HD2 LYS B  13      36.602  88.713  92.896  1.00167.99           H  
ATOM    506  HD3 LYS B  13      35.834  87.917  94.037  1.00167.99           H  
ATOM    507  HE2 LYS B  13      37.872  86.519  94.095  1.00180.00           H  
ATOM    508  HE3 LYS B  13      38.556  87.780  93.400  1.00180.00           H  
ATOM    509  HZ1 LYS B  13      38.749  87.921  95.672  1.00174.74           H  
ATOM    510  HZ2 LYS B  13      37.932  89.025  95.210  1.00174.74           H  
ATOM    511  HZ3 LYS B  13      37.311  87.879  95.842  1.00174.74           H  
ATOM    512  N   CYS B  14      31.505  86.151  91.366  1.00107.21           N  
ANISOU  512  N   CYS B  14    11971  15020  13744   2685   1372    534       N  
ATOM    513  CA  CYS B  14      30.115  86.572  91.479  1.00 92.70           C  
ANISOU  513  CA  CYS B  14    10629  12882  11710   2366   1295    628       C  
ATOM    514  C   CYS B  14      29.668  86.317  92.911  1.00 86.89           C  
ANISOU  514  C   CYS B  14    10075  12302  10637   2915    971    675       C  
ATOM    515  O   CYS B  14      29.867  85.219  93.435  1.00 82.71           O  
ANISOU  515  O   CYS B  14     9723  11829   9873   3550   1117    859       O  
ATOM    516  CB  CYS B  14      29.210  85.801  90.509  1.00102.66           C  
ANISOU  516  CB  CYS B  14    12482  13691  12833   2119   1801    874       C  
ATOM    517  SG  CYS B  14      29.310  86.254  88.775  1.00105.26           S  
ANISOU  517  SG  CYS B  14    12784  13814  13398   1402   2161    855       S  
ATOM    518  H   CYS B  14      31.644  85.369  91.695  1.00128.65           H  
ATOM    519  HA  CYS B  14      30.041  87.521  91.291  1.00111.24           H  
ATOM    520  HB2 CYS B  14      29.433  84.859  90.572  1.00123.19           H  
ATOM    521  HB3 CYS B  14      28.289  85.931  90.786  1.00123.19           H  
ATOM    522  HG  CYS B  14      29.013  87.411  88.656  1.00126.32           H  
ATOM    523  N   ALA B  15      29.075  87.320  93.546  1.00 69.55           N  
ANISOU  523  N   ALA B  15     7866  10151   8409   2703    585    528       N  
ATOM    524  CA  ALA B  15      28.585  87.161  94.903  1.00 69.75           C  
ANISOU  524  CA  ALA B  15     8110  10307   8084   3187    293    560       C  
ATOM    525  C   ALA B  15      27.261  87.881  95.019  1.00 72.12           C  
ANISOU  525  C   ALA B  15     8779  10281   8341   2758    216    577       C  
ATOM    526  O   ALA B  15      27.042  88.899  94.372  1.00 71.54           O  
ANISOU  526  O   ALA B  15     8560  10082   8539   2158    179    460       O  
ATOM    527  CB  ALA B  15      29.543  87.723  95.942  1.00 81.45           C  
ANISOU  527  CB  ALA B  15     9009  12392   9546   3526   -234    239       C  
ATOM    528  H   ALA B  15      28.946  88.102  93.211  1.00 83.46           H  
ATOM    529  HA  ALA B  15      28.444  86.220  95.089  1.00 83.70           H  
ATOM    530  HB1 ALA B  15      29.165  87.589  96.825  1.00 97.74           H  
ATOM    531  HB2 ALA B  15      30.392  87.260  95.872  1.00 97.74           H  
ATOM    532  HB3 ALA B  15      29.668  88.671  95.776  1.00 97.74           H  
ATOM    533  N   ILE B  16      26.401  87.379  95.869  1.00 61.33           N  
ANISOU  533  N   ILE B  16     7885   8771   6647   3104    225    734       N  
ATOM    534  CA  ILE B  16      25.108  87.993  96.065  1.00 60.51           C  
ANISOU  534  CA  ILE B  16     8121   8357   6512   2753    170    749       C  
ATOM    535  C   ILE B  16      25.259  89.064  97.125  1.00 64.36           C  
ANISOU  535  C   ILE B  16     8333   9140   6982   2781   -330    480       C  
ATOM    536  O   ILE B  16      25.870  88.821  98.167  1.00 78.08           O  
ANISOU  536  O   ILE B  16     9928  11268   8471   3335   -594    385       O  
ATOM    537  CB  ILE B  16      24.069  86.938  96.448  1.00 71.29           C  
ANISOU  537  CB  ILE B  16    10131   9367   7590   3056    508   1001       C  
ATOM    538  CG1 ILE B  16      23.836  86.067  95.204  1.00 82.60           C  
ANISOU  538  CG1 ILE B  16    11780  10486   9118   2822   1038   1149       C  
ATOM    539  CG2 ILE B  16      22.790  87.617  96.911  1.00 61.80           C  
ANISOU  539  CG2 ILE B  16     9212   7912   6357   2784    390    974       C  
ATOM    540  CD1 ILE B  16      23.436  84.672  95.508  1.00 91.35           C  
ANISOU  540  CD1 ILE B  16    13392  11312  10007   3265   1525   1349       C  
ATOM    541  H   ILE B  16      26.540  86.679  96.350  1.00 73.60           H  
ATOM    542  HA  ILE B  16      24.824  88.417  95.240  1.00 72.61           H  
ATOM    543  HB  ILE B  16      24.420  86.387  97.166  1.00 85.55           H  
ATOM    544 HG12 ILE B  16      23.131  86.467  94.671  1.00 99.12           H  
ATOM    545 HG13 ILE B  16      24.657  86.033  94.689  1.00 99.12           H  
ATOM    546 HG21 ILE B  16      22.141  86.937  97.150  1.00 74.16           H  
ATOM    547 HG22 ILE B  16      22.989  88.171  97.682  1.00 74.16           H  
ATOM    548 HG23 ILE B  16      22.445  88.164  96.189  1.00 74.16           H  
ATOM    549 HD11 ILE B  16      23.309  84.192  94.675  1.00109.63           H  
ATOM    550 HD12 ILE B  16      24.136  84.250  96.030  1.00109.63           H  
ATOM    551 HD13 ILE B  16      22.608  84.684  96.013  1.00109.63           H  
ATOM    552  N   ILE B  17      24.750  90.258  96.850  1.00 56.88           N  
ANISOU  552  N   ILE B  17     7290   8037   6284   2207   -445    345       N  
ATOM    553  CA  ILE B  17      24.879  91.364  97.780  1.00 58.61           C  
ANISOU  553  CA  ILE B  17     7236   8480   6552   2129   -844     27       C  
ATOM    554  C   ILE B  17      23.500  91.859  98.158  1.00 62.95           C  
ANISOU  554  C   ILE B  17     8210   8657   7052   1917   -828    116       C  
ATOM    555  O   ILE B  17      22.575  91.728  97.344  1.00 56.80           O  
ANISOU  555  O   ILE B  17     7746   7481   6354   1627   -542    360       O  
ATOM    556  CB  ILE B  17      25.709  92.498  97.204  1.00 60.37           C  
ANISOU  556  CB  ILE B  17     6877   8844   7218   1635   -929   -285       C  
ATOM    557  CG1 ILE B  17      25.138  92.995  95.893  1.00 56.85           C  
ANISOU  557  CG1 ILE B  17     6567   7962   7073   1058   -598    -90       C  
ATOM    558  CG2 ILE B  17      27.129  92.034  96.973  1.00 77.26           C  
ANISOU  558  CG2 ILE B  17     8520  11401   9435   1873   -968   -442       C  
ATOM    559  CD1 ILE B  17      25.760  94.321  95.514  1.00 58.93           C  
ANISOU  559  CD1 ILE B  17     6357   8242   7791    565   -602   -385       C  
ATOM    560  H   ILE B  17      24.325  90.451  96.128  1.00 68.25           H  
ATOM    561  HA  ILE B  17      25.317  91.050  98.586  1.00 70.33           H  
ATOM    562  HB  ILE B  17      25.719  93.232  97.838  1.00 72.44           H  
ATOM    563 HG12 ILE B  17      25.332  92.353  95.192  1.00 68.22           H  
ATOM    564 HG13 ILE B  17      24.181  93.120  95.984  1.00 68.22           H  
ATOM    565 HG21 ILE B  17      27.645  92.768  96.606  1.00 92.72           H  
ATOM    566 HG22 ILE B  17      27.510  91.752  97.819  1.00 92.72           H  
ATOM    567 HG23 ILE B  17      27.120  91.290  96.350  1.00 92.72           H  
ATOM    568 HD11 ILE B  17      25.380  94.618  94.672  1.00 70.72           H  
ATOM    569 HD12 ILE B  17      25.571  94.968  96.210  1.00 70.72           H  
ATOM    570 HD13 ILE B  17      26.719  94.204  95.421  1.00 70.72           H  
HETATM  571  N   SAR B  18      23.332  92.429  99.362  1.00 56.96           N  
ANISOU  571  N   SAR B  18     7443   8047   6153   2054  -1128   -103       N  
HETATM  572  CA  SAR B  18      22.107  93.171  99.616  1.00 53.95           C  
ANISOU  572  CA  SAR B  18     7362   7286   5849   1741  -1094    -68       C  
HETATM  573  C   SAR B  18      22.226  94.519  99.337  1.00 64.18           C  
ANISOU  573  C   SAR B  18     8325   8526   7533   1218  -1163   -300       C  
HETATM  574  O   SAR B  18      23.281  95.074  99.421  1.00 64.43           O  
ANISOU  574  O   SAR B  18     7858   8883   7740   1116  -1333   -639       O  
HETATM  575  CN  SAR B  18      24.360  92.565 100.433  1.00 62.27           C  
ANISOU  575  CN  SAR B  18     7729   9300   6630   2441  -1528   -453       C  
HETATM  576  HN1 SAR B  18      24.545  93.518 100.591  1.00 74.72           H  
HETATM  577  HN2 SAR B  18      25.188  92.112 100.152  1.00 74.72           H  
HETATM  578  HN3 SAR B  18      24.028  92.156 101.257  1.00 74.72           H  
HETATM  579  HA2 SAR B  18      21.253  92.794  99.366  1.00 64.74           H  
HETATM  580  HA3 SAR B  18      22.176  93.132 100.600  1.00 64.74           H  
ATOM    581  N   LEU B  19      21.112  95.174  99.030  1.00 50.60           N  
ANISOU  581  N   LEU B  19     6851   6377   5996    859  -1003   -149       N  
ATOM    582  CA  LEU B  19      21.065  96.623  98.834  1.00 59.92           C  
ANISOU  582  CA  LEU B  19     7787   7394   7588    363   -977   -330       C  
ATOM    583  C   LEU B  19      19.903  97.202  99.619  1.00 59.21           C  
ANISOU  583  C   LEU B  19     8011   7006   7479    303   -987   -319       C  
ATOM    584  O   LEU B  19      18.759  96.874  99.340  1.00 52.23           O  
ANISOU  584  O   LEU B  19     7511   5805   6530    314   -823      5       O  
ATOM    585  CB  LEU B  19      20.904  96.965  97.358  1.00 58.52           C  
ANISOU  585  CB  LEU B  19     7574   6950   7712    -17   -676    -62       C  
ATOM    586  CG  LEU B  19      22.002  96.357  96.500  1.00 60.41           C  
ANISOU  586  CG  LEU B  19     7548   7428   7979     20   -598    -54       C  
ATOM    587  CD1 LEU B  19      21.640  96.526  95.068  1.00 70.09           C  
ANISOU  587  CD1 LEU B  19     8873   8394   9363   -279   -286    271       C  
ATOM    588  CD2 LEU B  19      23.340  97.017  96.798  1.00 59.83           C  
ANISOU  588  CD2 LEU B  19     6909   7654   8168   -103   -717   -506       C  
ATOM    589  H   LEU B  19      20.349  94.792  98.927  1.00 60.72           H  
ATOM    590  HA  LEU B  19      21.888  97.023  99.157  1.00 71.91           H  
ATOM    591  HB2 LEU B  19      20.053  96.623  97.044  1.00 70.23           H  
ATOM    592  HB3 LEU B  19      20.937  97.929  97.250  1.00 70.23           H  
ATOM    593  HG  LEU B  19      22.076  95.408  96.691  1.00 72.50           H  
ATOM    594 HD11 LEU B  19      22.339  96.139  94.518  1.00 84.10           H  
ATOM    595 HD12 LEU B  19      20.798  96.075  94.900  1.00 84.10           H  
ATOM    596 HD13 LEU B  19      21.554  97.473  94.875  1.00 84.10           H  
ATOM    597 HD21 LEU B  19      24.023  96.613  96.239  1.00 71.79           H  
ATOM    598 HD22 LEU B  19      23.274  97.966  96.604  1.00 71.79           H  
ATOM    599 HD23 LEU B  19      23.557  96.885  97.734  1.00 71.79           H  
ATOM    600  N   MET B  20      20.198  98.060 100.592  1.00 54.33           N  
ANISOU  600  N   MET B  20     7200   6507   6935    219  -1161   -717       N  
ATOM    601  CA  MET B  20      19.218  98.467 101.586  1.00 57.73           C  
ANISOU  601  CA  MET B  20     7947   6714   7273    250  -1188   -766       C  
ATOM    602  C   MET B  20      18.641  99.809 101.234  1.00 59.60           C  
ANISOU  602  C   MET B  20     8138   6527   7981   -242   -953   -767       C  
ATOM    603  O   MET B  20      19.391 100.729 100.897  1.00 62.46           O  
ANISOU  603  O   MET B  20     8108   6910   8714   -592   -869  -1027       O  
ATOM    604  CB  MET B  20      19.852  98.552 102.974  1.00 61.12           C  
ANISOU  604  CB  MET B  20     8236   7571   7415    499  -1517  -1237       C  
ATOM    605  CG  MET B  20      18.839  98.701 104.113  1.00 74.60           C  
ANISOU  605  CG  MET B  20    10372   9077   8896    643  -1533  -1261       C  
ATOM    606  SD  MET B  20      19.617  98.354 105.703  1.00 81.59           S  
ANISOU  606  SD  MET B  20    11195  10616   9190   1154  -1963  -1718       S  
ATOM    607  CE  MET B  20      20.026 100.036 106.140  1.00101.47           C  
ANISOU  607  CE  MET B  20    13249  13191  12114    565  -2025  -2383       C  
ATOM    608  H   MET B  20      20.970  98.424 100.697  1.00 65.19           H  
ATOM    609  HA  MET B  20      18.504  97.810 101.618  1.00 69.27           H  
ATOM    610  HB2 MET B  20      20.362  97.742 103.135  1.00 73.34           H  
ATOM    611  HB3 MET B  20      20.442  99.321 103.001  1.00 73.34           H  
ATOM    612  HG2 MET B  20      18.501  99.610 104.128  1.00 89.52           H  
ATOM    613  HG3 MET B  20      18.112  98.071 103.983  1.00 89.52           H  
ATOM    614  HE1 MET B  20      20.469 100.038 107.003  1.00121.76           H  
ATOM    615  HE2 MET B  20      20.616 100.403 105.463  1.00121.76           H  
ATOM    616  HE3 MET B  20      19.209 100.557 106.186  1.00121.76           H  
ATOM    617  N   VAL B  21      17.307  99.912 101.329  1.00 53.05           N  
ANISOU  617  N   VAL B  21     7702   5291   7162   -250   -798   -483       N  
ATOM    618  CA  VAL B  21      16.572 101.186 101.291  1.00 61.14           C  
ANISOU  618  CA  VAL B  21     8759   5881   8589   -602   -563   -459       C  
ATOM    619  C   VAL B  21      15.618 101.251 102.517  1.00 58.84           C  
ANISOU  619  C   VAL B  21     8815   5404   8135   -457   -596   -542       C  
ATOM    620  O   VAL B  21      14.496 100.683 102.496  1.00 54.21           O  
ANISOU  620  O   VAL B  21     8589   4586   7421   -285   -506   -218       O  
ATOM    621  CB  VAL B  21      15.778 101.293 100.005  1.00 58.14           C  
ANISOU  621  CB  VAL B  21     8488   5190   8414   -730   -304     40       C  
ATOM    622  CG1 VAL B  21      15.327 102.732  99.823  1.00 61.82           C  
ANISOU  622  CG1 VAL B  21     8903   5241   9346  -1057     -9     89       C  
ATOM    623  CG2 VAL B  21      16.611 100.806  98.828  1.00 71.07           C  
ANISOU  623  CG2 VAL B  21     9912   7055  10035   -755   -285    179       C  
ATOM    624  H   VAL B  21      16.789  99.232 101.419  1.00 63.66           H  
ATOM    625  HA  VAL B  21      17.195 101.928 101.338  1.00 73.37           H  
ATOM    626  HB  VAL B  21      14.988 100.734 100.069  1.00 69.77           H  
ATOM    627 HG11 VAL B  21      14.819 102.801  98.999  1.00 74.19           H  
ATOM    628 HG12 VAL B  21      14.772 102.986 100.577  1.00 74.19           H  
ATOM    629 HG13 VAL B  21      16.109 103.304  99.778  1.00 74.19           H  
ATOM    630 HG21 VAL B  21      16.086 100.883  98.016  1.00 85.28           H  
ATOM    631 HG22 VAL B  21      17.410 101.353  98.759  1.00 85.28           H  
ATOM    632 HG23 VAL B  21      16.857  99.880  98.978  1.00 85.28           H  
TER
HETATM  633  N   ORN C   1      29.084  93.864  86.329  1.00 57.74           N  
ANISOU  633  N   ORN C   1     6538   7257   8143   1193   1211   -328       N  
HETATM  634  CA  ORN C   1      27.751  94.464  86.298  1.00 60.92           C  
ANISOU  634  CA  ORN C   1     7377   7627   8142   1006    787   -103       C  
HETATM  635  C   ORN C   1      26.972  93.806  87.461  1.00 60.71           C  
ANISOU  635  C   ORN C   1     7347   7483   8239   1470    454      3       C  
HETATM  636  O   ORN C   1      27.413  92.814  88.077  1.00 64.76           O  
ANISOU  636  O   ORN C   1     7632   7908   9067   1869    592    -87       O  
HETATM  637  CB  ORN C   1      26.981  94.111  85.006  1.00 63.94           C  
ANISOU  637  CB  ORN C   1     8293   7942   8060    611   1037   -181       C  
HETATM  638  CG  ORN C   1      27.234  94.970  83.802  1.00 69.72           C  
ANISOU  638  CG  ORN C   1     9268   8771   8452     52   1222   -189       C  
HETATM  639  CD  ORN C   1      26.674  96.361  83.939  1.00 58.67           C  
ANISOU  639  CD  ORN C   1     8039   7407   6844   -177    684     70       C  
HETATM  640  NE  ORN C   1      25.225  96.379  83.817  1.00 65.20           N  
ANISOU  640  NE  ORN C   1     9314   8121   7337   -233    304    174       N  
HETATM  641  HA  ORN C   1      27.857  95.535  86.492  1.00 73.10           H  
HETATM  642  HB2 ORN C   1      25.905  94.179  85.221  1.00 76.73           H  
HETATM  643  HB3 ORN C   1      27.240  93.079  84.733  1.00 76.73           H  
HETATM  644  HG2 ORN C   1      28.315  95.033  83.631  1.00 83.66           H  
HETATM  645  HG3 ORN C   1      26.768  94.493  82.932  1.00 83.66           H  
HETATM  646  HD2 ORN C   1      27.094  96.983  83.143  1.00 70.40           H  
HETATM  647  HD3 ORN C   1      26.950  96.755  84.921  1.00 70.40           H  
HETATM  648  HE1 ORN C   1      24.847  96.344  82.873  1.00 78.24           H  
HETATM  649  H1  ORN C   1      29.498  93.847  87.264  1.00 69.29           H  
HETATM  650  H2  ORN C   1      29.097  92.892  86.010  1.00 69.29           H  
HETATM  651  H3  ORN C   1      29.762  94.352  85.739  1.00 69.29           H  
ATOM    652  N   LEU C   2      25.766  94.383  87.738  1.00 51.38           N  
ANISOU  652  N   LEU C   2     6439   6293   6789   1398      6    195       N  
ATOM    653  CA  LEU C   2      24.885  93.797  88.744  1.00 58.26           C  
ANISOU  653  CA  LEU C   2     7354   7075   7706   1754   -260    296       C  
ATOM    654  C   LEU C   2      23.794  93.050  88.002  1.00 61.29           C  
ANISOU  654  C   LEU C   2     8161   7327   7799   1561   -121    239       C  
ATOM    655  O   LEU C   2      23.366  93.561  86.974  1.00 52.04           O  
ANISOU  655  O   LEU C   2     7290   6174   6309   1154   -117    215       O  
ATOM    656  CB  LEU C   2      24.190  94.870  89.585  1.00 53.42           C  
ANISOU  656  CB  LEU C   2     6728   6553   7016   1825   -834    495       C  
ATOM    657  CG  LEU C   2      25.044  95.812  90.423  1.00 68.69           C  
ANISOU  657  CG  LEU C   2     8287   8612   9202   2008  -1118    571       C  
ATOM    658  CD1 LEU C   2      24.121  96.926  90.973  1.00 64.70           C  
ANISOU  658  CD1 LEU C   2     7874   8181   8527   1950  -1647    723       C  
ATOM    659  CD2 LEU C   2      25.806  95.056  91.512  1.00 75.10           C  
ANISOU  659  CD2 LEU C   2     8757   9393  10385   2506  -1071    550       C  
ATOM    660  H   LEU C   2      25.422  95.039  87.299  1.00 61.65           H  
ATOM    661  HA  LEU C   2      25.372  93.187  89.320  1.00 69.91           H  
ATOM    662  HB2 LEU C   2      23.669  95.426  88.984  1.00 64.10           H  
ATOM    663  HB3 LEU C   2      23.587  94.421  90.198  1.00 64.10           H  
ATOM    664  HG  LEU C   2      25.699  96.233  89.844  1.00 82.43           H  
ATOM    665 HD11 LEU C   2      24.650  97.537  91.510  1.00 77.64           H  
ATOM    666 HD12 LEU C   2      23.722  97.402  90.228  1.00 77.64           H  
ATOM    667 HD13 LEU C   2      23.428  96.521  91.517  1.00 77.64           H  
ATOM    668 HD21 LEU C   2      26.336  95.688  92.022  1.00 90.12           H  
ATOM    669 HD22 LEU C   2      25.168  94.614  92.093  1.00 90.12           H  
ATOM    670 HD23 LEU C   2      26.384  94.399  91.094  1.00 90.12           H  
ATOM    671  N   VAL C   3      23.248  91.949  88.497  1.00 57.22           N  
ANISOU  671  N   VAL C   3     9827   6727   5185   2322    692    273       N  
ATOM    672  CA  VAL C   3      22.104  91.202  87.979  1.00 62.30           C  
ANISOU  672  CA  VAL C   3    10837   7120   5714   2323    491    288       C  
ATOM    673  C   VAL C   3      20.998  91.175  89.075  1.00 59.30           C  
ANISOU  673  C   VAL C   3    10330   6922   5279   1954    290    322       C  
ATOM    674  O   VAL C   3      21.172  90.550  90.137  1.00 53.84           O  
ANISOU  674  O   VAL C   3     9532   6360   4565   1825    142    456       O  
ATOM    675  CB  VAL C   3      22.496  89.809  87.564  1.00 68.14           C  
ANISOU  675  CB  VAL C   3    11876   7568   6445   2554    380    421       C  
ATOM    676  CG1 VAL C   3      21.306  89.107  87.006  1.00 62.77           C  
ANISOU  676  CG1 VAL C   3    11583   6625   5641   2472    162    382       C  
ATOM    677  CG2 VAL C   3      23.552  89.897  86.534  1.00 65.21           C  
ANISOU  677  CG2 VAL C   3    11647   6981   6150   2924    668    404       C  
ATOM    678  HA  VAL C   3      21.749  91.661  87.202  1.00 74.76           H  
ATOM    679  HB  VAL C   3      22.832  89.312  88.327  1.00 81.76           H  
ATOM    680 HG11 VAL C   3      21.564  88.211  86.740  1.00 75.32           H  
ATOM    681 HG12 VAL C   3      20.616  89.066  87.687  1.00 75.32           H  
ATOM    682 HG13 VAL C   3      20.981  89.601  86.236  1.00 75.32           H  
ATOM    683 HG21 VAL C   3      23.806  89.000  86.265  1.00 78.26           H  
ATOM    684 HG22 VAL C   3      23.208  90.386  85.771  1.00 78.26           H  
ATOM    685 HG23 VAL C   3      24.318  90.360  86.907  1.00 78.26           H  
ATOM    686  H   VAL C   3      23.536  91.664  89.256  1.00 68.66           H  
ATOM    687  N   PHE C   4      19.920  91.917  88.864  1.00 54.23           N  
ANISOU  687  N   PHE C   4     9683   6296   4626   1810    331    232       N  
ATOM    688  CA  PHE C   4      18.785  91.798  89.770  1.00 56.00           C  
ANISOU  688  CA  PHE C   4     9811   6609   4856   1497    204    294       C  
ATOM    689  C   PHE C   4      17.903  90.620  89.335  1.00 62.78           C  
ANISOU  689  C   PHE C   4    10914   7216   5723   1475    -88    362       C  
ATOM    690  O   PHE C   4      18.027  90.093  88.242  1.00 55.89           O  
ANISOU  690  O   PHE C   4    10327   6105   4803   1674   -189    322       O  
ATOM    691  CB  PHE C   4      17.984  93.064  89.797  1.00 52.41           C  
ANISOU  691  CB  PHE C   4     9199   6263   4453   1367    421    221       C  
ATOM    692  CG  PHE C   4      18.770  94.212  90.259  1.00 56.05           C  
ANISOU  692  CG  PHE C   4     9474   6922   4900   1317    746    118       C  
ATOM    693  CD2 PHE C   4      18.716  94.616  91.574  1.00 60.35           C  
ANISOU  693  CD2 PHE C   4     9865   7670   5397   1014    854    118       C  
ATOM    694  CD1 PHE C   4      19.607  94.866  89.396  1.00 56.76           C  
ANISOU  694  CD1 PHE C   4     9585   6969   5010   1550    966      8       C  
ATOM    695  CE2 PHE C   4      19.481  95.699  92.006  1.00 60.78           C  
ANISOU  695  CE2 PHE C   4     9783   7899   5414    898   1146    -23       C  
ATOM    696  CE1 PHE C   4      20.348  95.951  89.841  1.00 61.82           C  
ANISOU  696  CE1 PHE C   4    10040   7777   5673   1444   1292   -116       C  
ATOM    697  CZ  PHE C   4      20.303  96.340  91.093  1.00 52.85           C  
ANISOU  697  CZ  PHE C   4     8751   6849   4480   1111   1355   -144       C  
ATOM    698  H   PHE C   4      19.819  92.482  88.224  1.00 65.08           H  
ATOM    699  HA  PHE C   4      19.107  91.622  90.668  1.00 67.19           H  
ATOM    700  HB2 PHE C   4      17.666  93.257  88.902  1.00 62.90           H  
ATOM    701  HB3 PHE C   4      17.233  92.951  90.401  1.00 62.90           H  
ATOM    702  HD2 PHE C   4      18.160  94.172  92.173  1.00 72.43           H  
ATOM    703  HD1 PHE C   4      19.655  94.604  88.505  1.00 68.11           H  
ATOM    704  HE2 PHE C   4      19.443  95.983  92.891  1.00 72.94           H  
ATOM    705  HE1 PHE C   4      20.910  96.393  89.247  1.00 74.19           H  
ATOM    706  HZ  PHE C   4      20.813  97.068  91.367  1.00 63.42           H  
ATOM    707  N  APHE C   5      17.035  90.195  90.229  0.61 61.47           N  
ANISOU  707  N  APHE C   5    10669   7077   5610   1207   -192    456       N  
ATOM    708  CA APHE C   5      16.212  89.017  90.006  0.61 57.14           C  
ANISOU  708  CA APHE C   5    10314   6283   5113   1105   -448    515       C  
ATOM    709  C  APHE C   5      14.755  89.435  90.001  0.61 62.59           C  
ANISOU  709  C  APHE C   5    10823   6991   5967    868   -499    525       C  
ATOM    710  O  APHE C   5      14.300  90.192  90.868  0.61 51.19           O  
ANISOU  710  O  APHE C   5     9119   5722   4610    703   -297    577       O  
ATOM    711  CB APHE C   5      16.468  87.983  91.085  0.61 70.18           C  
ANISOU  711  CB APHE C   5    12027   7897   6742   1012   -489    664       C  
ATOM    712  CG APHE C   5      17.878  87.445  91.089  0.61 77.90           C  
ANISOU  712  CG APHE C   5    13130   8857   7610   1287   -464    730       C  
ATOM    713  CD1APHE C   5      18.545  87.189  89.890  0.61 84.19           C  
ANISOU  713  CD1APHE C   5    14159   9453   8378   1577   -458    660       C  
ATOM    714  CD2APHE C   5      18.534  87.179  92.291  0.61 89.99           C  
ANISOU  714  CD2APHE C   5    14558  10567   9068   1274   -436    891       C  
ATOM    715  CE1APHE C   5      19.834  86.681  89.894  0.61 77.75           C  
ANISOU  715  CE1APHE C   5    13410   8595   7537   1864   -374    770       C  
ATOM    716  CE2APHE C   5      19.825  86.664  92.298  0.61 75.05           C  
ANISOU  716  CE2APHE C   5    12700   8687   7130   1559   -435   1014       C  
ATOM    717  CZ APHE C   5      20.467  86.419  91.104  0.61 77.01           C  
ANISOU  717  CZ APHE C   5    13118   8716   7426   1860   -379    963       C  
ATOM    718  H  APHE C   5      16.899  90.575  90.989  0.61 73.77           H  
ATOM    719  HA APHE C   5      16.426  88.627  89.144  0.61 68.56           H  
ATOM    720  HB2APHE C   5      16.302  88.387  91.951  0.61 84.22           H  
ATOM    721  HB3APHE C   5      15.866  87.235  90.951  0.61 84.22           H  
ATOM    722  HD1APHE C   5      18.119  87.359  89.081  0.61101.03           H  
ATOM    723  HD2APHE C   5      18.098  87.339  93.097  0.61107.99           H  
ATOM    724  HE1APHE C   5      20.273  86.514  89.091  0.61 93.30           H  
ATOM    725  HE2APHE C   5      20.256  86.492  93.105  0.61 90.06           H  
ATOM    726  HZ APHE C   5      21.334  86.083  91.108  0.61 92.41           H  
ATOM    727  N  BPHE C   5      17.008  90.248  90.237  0.39 58.74           N  
ANISOU  727  N  BPHE C   5    10312   6738   5266   1201   -185    454       N  
ATOM    728  CA BPHE C   5      16.165  89.065  90.160  0.39 59.21           C  
ANISOU  728  CA BPHE C   5    10545   6570   5383   1076   -433    525       C  
ATOM    729  C  BPHE C   5      14.742  89.561  89.938  0.39 58.88           C  
ANISOU  729  C  BPHE C   5    10338   6535   5497    878   -487    516       C  
ATOM    730  O  BPHE C   5      14.319  90.562  90.530  0.39 44.67           O  
ANISOU  730  O  BPHE C   5     8271   4922   3781    765   -268    542       O  
ATOM    731  CB BPHE C   5      16.327  88.282  91.478  0.39 62.64           C  
ANISOU  731  CB BPHE C   5    10968   7034   5797    935   -434    678       C  
ATOM    732  CG BPHE C   5      15.578  86.974  91.571  0.39 66.90           C  
ANISOU  732  CG BPHE C   5    11707   7295   6417    792   -605    763       C  
ATOM    733  CD2BPHE C   5      16.272  85.763  91.545  0.39 64.46           C  
ANISOU  733  CD2BPHE C   5    11686   6774   6032    945   -667    850       C  
ATOM    734  CD1BPHE C   5      14.209  86.948  91.777  0.39 53.37           C  
ANISOU  734  CD1BPHE C   5     9871   5516   4892    501   -649    783       C  
ATOM    735  CE2BPHE C   5      15.605  84.555  91.676  0.39 59.94           C  
ANISOU  735  CE2BPHE C   5    11336   5899   5538    790   -756    917       C  
ATOM    736  CE1BPHE C   5      13.545  85.754  91.901  0.39 56.29           C  
ANISOU  736  CE1BPHE C   5    10403   5611   5374    324   -771    845       C  
ATOM    737  CZ BPHE C   5      14.245  84.554  91.848  0.39 62.11           C  
ANISOU  737  CZ BPHE C   5    11487   6110   6001    457   -817    895       C  
ATOM    738  H  BPHE C   5      16.863  90.701  90.954  0.39 70.48           H  
ATOM    739  HA BPHE C   5      16.433  88.504  89.415  0.39 71.06           H  
ATOM    740  HB2BPHE C   5      17.269  88.085  91.602  0.39 75.16           H  
ATOM    741  HB3BPHE C   5      16.017  88.844  92.206  0.39 75.16           H  
ATOM    742  HD2BPHE C   5      17.195  85.766  91.426  0.39 77.35           H  
ATOM    743  HD1BPHE C   5      13.732  87.746  91.811  0.39 64.05           H  
ATOM    744  HE2BPHE C   5      16.074  83.753  91.637  0.39 71.92           H  
ATOM    745  HE1BPHE C   5      12.623  85.747  92.020  0.39 67.55           H  
ATOM    746  HZ BPHE C   5      13.790  83.747  91.931  0.39 74.53           H  
ATOM    747  N   ALA C   6      14.016  88.918  89.049  1.00 53.30           N  
ANISOU  747  N   ALA C   6     9788   5624   4838    837   -764    486       N  
ATOM    748  CA  ALA C   6      12.609  89.192  88.968  1.00 47.63           C  
ANISOU  748  CA  ALA C   6     8827   4934   4337    615   -882    537       C  
ATOM    749  C   ALA C   6      11.952  87.932  88.497  1.00 53.06           C  
ANISOU  749  C   ALA C   6     9712   5362   5085    431  -1236    516       C  
ATOM    750  O   ALA C   6      12.605  87.055  87.920  1.00 54.92           O  
ANISOU  750  O   ALA C   6    10354   5376   5137    537  -1362    426       O  
ATOM    751  CB  ALA C   6      12.302  90.311  87.997  1.00 50.20           C  
ANISOU  751  CB  ALA C   6     9044   5378   4653    781   -883    497       C  
ATOM    752  H   ALA C   6      14.313  88.364  88.462  1.00 63.96           H  
ATOM    753  HA  ALA C   6      12.262  89.425  89.843  1.00 57.16           H  
ATOM    754  HB1 ALA C   6      11.344  90.457  87.978  1.00 60.24           H  
ATOM    755  HB2 ALA C   6      12.755  91.116  88.291  1.00 60.24           H  
ATOM    756  HB3 ALA C   6      12.617  90.058  87.115  1.00 60.24           H  
ATOM    757  N   GLU C   7      10.661  87.844  88.737  1.00 50.40           N  
ANISOU  757  N   GLU C   7     9090   5027   5032    142  -1359    601       N  
ATOM    758  CA  GLU C   7       9.849  86.832  88.067  1.00 60.39           C  
ANISOU  758  CA  GLU C   7    10480   6071   6393   -102  -1761    544       C  
ATOM    759  C   GLU C   7       8.952  87.526  87.081  1.00 56.03           C  
ANISOU  759  C   GLU C   7     9697   5662   5928   -120  -2057    544       C  
ATOM    760  O   GLU C   7       8.311  88.521  87.418  1.00 55.58           O  
ANISOU  760  O   GLU C   7     9182   5829   6105   -112  -1905    695       O  
ATOM    761  CB  GLU C   7       9.014  86.021  89.031  1.00 56.37           C  
ANISOU  761  CB  GLU C   7     9796   5423   6200   -462  -1723    653       C  
ATOM    762  CG  GLU C   7       9.845  85.139  89.884  1.00 70.19           C  
ANISOU  762  CG  GLU C   7    11856   6994   7820   -427  -1496    679       C  
ATOM    763  CD  GLU C   7       9.013  84.000  90.404  1.00 64.74           C  
ANISOU  763  CD  GLU C   7    11177   6027   7393   -787  -1532    735       C  
ATOM    764  OE1 GLU C   7       7.852  84.231  90.821  1.00 75.59           O  
ANISOU  764  OE1 GLU C   7    12135   7445   9140  -1060  -1504    841       O  
ATOM    765  OE2 GLU C   7       9.499  82.866  90.321  1.00 74.96           O1-
ANISOU  765  OE2 GLU C   7    12900   7028   8555   -792  -1557    679       O1-
ATOM    766  H   GLU C   7      10.226  88.352  89.277  1.00 60.48           H  
ATOM    767  HA  GLU C   7      10.428  86.225  87.580  1.00 72.46           H  
ATOM    768  HB2 GLU C   7       8.521  86.624  89.609  1.00 67.65           H  
ATOM    769  HB3 GLU C   7       8.400  85.464  88.528  1.00 67.65           H  
ATOM    770  HG2 GLU C   7      10.576  84.774  89.361  1.00 84.23           H  
ATOM    771  HG3 GLU C   7      10.185  85.644  90.640  1.00 84.23           H  
ATOM    772  N   ASP C   8       8.913  86.980  85.878  1.00 58.66           N  
ANISOU  772  N   ASP C   8    10384   5850   6054   -136  -2465    391       N  
ATOM    773  CA  ASP C   8       8.079  87.480  84.817  1.00 61.57           C  
ANISOU  773  CA  ASP C   8    10612   6359   6425   -157  -2870    394       C  
ATOM    774  C   ASP C   8       6.826  86.611  84.872  1.00 66.46           C  
ANISOU  774  C   ASP C   8    10995   6886   7370   -641  -3268    413       C  
ATOM    775  O   ASP C   8       6.897  85.411  84.601  1.00 69.04           O  
ANISOU  775  O   ASP C   8    11729   6916   7586   -883  -3487    240       O  
ATOM    776  CB  ASP C   8       8.826  87.368  83.485  1.00 62.28           C  
ANISOU  776  CB  ASP C   8    11320   6318   6026     89  -3078    199       C  
ATOM    777  CG  ASP C   8       8.246  88.242  82.421  1.00 74.54           C  
ANISOU  777  CG  ASP C   8    12774   8085   7464    228  -3397    246       C  
ATOM    778  OD1 ASP C   8       7.181  88.840  82.678  1.00 88.88           O  
ANISOU  778  OD1 ASP C   8    13987  10155   9630    113  -3513    448       O  
ATOM    779  OD2 ASP C   8       8.869  88.350  81.334  1.00 74.80           O1-
ANISOU  779  OD2 ASP C   8    13342   8020   7058    489  -3493    111       O1-
ATOM    780  H   ASP C   8       9.380  86.294  85.651  1.00 70.39           H  
ATOM    781  HA  ASP C   8       7.839  88.406  84.979  1.00 73.89           H  
ATOM    782  HB2 ASP C   8       9.750  87.631  83.618  1.00 74.74           H  
ATOM    783  HB3 ASP C   8       8.784  86.450  83.175  1.00 74.74           H  
ATOM    784  N   CYS C   9       5.698  87.198  85.254  1.00 68.12           N  
ANISOU  784  N   CYS C   9    10546   7318   8020   -791  -3303    629       N  
ATOM    785  CA  CYS C   9       4.500  86.445  85.590  1.00 72.75           C  
ANISOU  785  CA  CYS C   9    10755   7823   9063  -1274  -3552    696       C  
ATOM    786  C   CYS C   9       3.370  86.811  84.647  1.00 78.05           C  
ANISOU  786  C   CYS C   9    11019   8724   9914  -1412  -4130    788       C  
ATOM    787  O   CYS C   9       3.133  87.991  84.377  1.00 77.35           O  
ANISOU  787  O   CYS C   9    10587   8932   9872  -1116  -4089    983       O  
ATOM    788  CB  CYS C   9       4.069  86.708  87.031  1.00 71.29           C  
ANISOU  788  CB  CYS C   9    10075   7662   9348  -1362  -3028    930       C  
ATOM    789  SG  CYS C   9       5.210  86.086  88.298  1.00 78.39           S  
ANISOU  789  SG  CYS C   9    11415   8312  10057  -1288  -2452    869       S  
ATOM    790  H   CYS C   9       5.602  88.049  85.328  1.00 81.75           H  
ATOM    791  HA  CYS C   9       4.681  85.497  85.495  1.00 87.30           H  
ATOM    792  HB2 CYS C   9       3.985  87.666  87.158  1.00 85.54           H  
ATOM    793  HB3 CYS C   9       3.209  86.284  87.178  1.00 85.54           H  
ATOM    794  N   GLY C  10       2.669  85.786  84.163  1.00 83.56           N  
ANISOU  794  N   GLY C  10    11753   9279  10717  -1875  -4666    656       N  
ATOM    795  CA  GLY C  10       1.594  85.962  83.225  1.00 90.80           C  
ANISOU  795  CA  GLY C  10    12292  10430  11778  -2084  -5351    725       C  
ATOM    796  C   GLY C  10       0.737  84.719  83.140  1.00112.97           C  
ANISOU  796  C   GLY C  10    15009  13037  14879  -2738  -5810    584       C  
ATOM    797  O   GLY C  10       1.245  83.609  82.936  1.00103.74           O  
ANISOU  797  O   GLY C  10    14510  11502  13403  -2973  -5884    271       O  
ATOM    798  H   GLY C  10       2.810  84.964  84.376  1.00100.27           H  
ATOM    799  HA2 GLY C  10       1.038  86.707  83.501  1.00108.96           H  
ATOM    800  HA3 GLY C  10       1.956  86.152  82.345  1.00108.96           H  
ATOM    801  N   SER C  11      -0.573  84.915  83.291  1.00122.73           N  
ANISOU  801  N   SER C  11    15397  14491  16744  -3035  -6083    830       N  
ATOM    802  CA  SER C  11      -1.567  83.845  83.246  1.00125.71           C  
ANISOU  802  CA  SER C  11    15501  14717  17544  -3722  -6532    732       C  
ATOM    803  C   SER C  11      -1.086  82.629  84.039  1.00117.78           C  
ANISOU  803  C   SER C  11    14993  13203  16555  -4003  -6090    501       C  
ATOM    804  O   SER C  11      -0.954  81.517  83.524  1.00128.66           O  
ANISOU  804  O   SER C  11    16940  14266  17678  -4394  -6411    165       O  
ATOM    805  CB  SER C  11      -1.902  83.471  81.799  1.00126.51           C  
ANISOU  805  CB  SER C  11    15878  14925  17265  -4018  -7484    499       C  
ATOM    806  OG  SER C  11      -0.842  82.742  81.217  1.00134.12           O  
ANISOU  806  OG  SER C  11    17924  15543  17490  -3994  -7514     94       O  
ATOM    807  H   SER C  11      -0.922  85.689  83.426  1.00147.28           H  
ATOM    808  HA  SER C  11      -2.383  84.163  83.663  1.00150.85           H  
ATOM    809  HB2 SER C  11      -2.704  82.925  81.791  1.00151.81           H  
ATOM    810  HB3 SER C  11      -2.047  84.282  81.288  1.00151.81           H  
ATOM    811  HG  SER C  11      -0.705  82.036  81.652  1.00160.94           H  
ATOM    812  N   ASN C  12      -0.801  82.869  85.317  1.00116.58           N  
ANISOU  812  N   ASN C  12    14671  12953  16671  -3781  -5311    696       N  
ATOM    813  CA  ASN C  12      -0.543  81.780  86.261  1.00125.12           C  
ANISOU  813  CA  ASN C  12    16073  13580  17887  -4029  -4838    590       C  
ATOM    814  C   ASN C  12       0.662  80.939  85.834  1.00117.14           C  
ANISOU  814  C   ASN C  12    16082  12232  16195  -3934  -4820    248       C  
ATOM    815  O   ASN C  12       0.640  79.705  85.889  1.00102.24           O  
ANISOU  815  O   ASN C  12    14594   9927  14327  -4327  -4824     38       O  
ATOM    816  CB  ASN C  12      -1.797  80.922  86.411  1.00133.35           C  
ANISOU  816  CB  ASN C  12    16631  14447  19587  -4712  -5085    589       C  
ATOM    817  CG  ASN C  12      -3.050  81.775  86.577  1.00138.60           C  
ANISOU  817  CG  ASN C  12    16218  15477  20965  -4796  -5208    955       C  
ATOM    818  ND2 ASN C  12      -4.178  81.302  86.052  1.00133.42           N  
ANISOU  818  ND2 ASN C  12    15048  14868  20777  -5370  -5813    931       N  
ATOM    819  OD1 ASN C  12      -2.989  82.865  87.159  1.00140.87           O  
ANISOU  819  OD1 ASN C  12    16139  15998  21387  -4349  -4752   1264       O  
ATOM    820  H   ASN C  12      -0.751  83.654  85.664  1.00139.90           H  
ATOM    821  HA  ASN C  12      -0.342  82.163  87.129  1.00150.14           H  
ATOM    822  HB2 ASN C  12      -1.906  80.375  85.617  1.00160.02           H  
ATOM    823  HB3 ASN C  12      -1.707  80.359  87.195  1.00160.02           H  
ATOM    824 HD21 ASN C  12      -4.908  81.752  86.124  1.00160.10           H  
ATOM    825 HD22 ASN C  12      -4.177  80.546  85.641  1.00160.10           H  
ATOM    826  N   LYS C  13       1.717  81.629  85.395  1.00 93.84           N  
ANISOU  826  N   LYS C  13    13547   9435  12674  -3397  -4745    208       N  
ATOM    827  CA  LYS C  13       2.983  81.017  85.011  1.00 91.30           C  
ANISOU  827  CA  LYS C  13    14141   8814  11734  -3178  -4618    -45       C  
ATOM    828  C   LYS C  13       4.048  82.062  85.282  1.00 84.33           C  
ANISOU  828  C   LYS C  13    13341   8157  10542  -2537  -4199     87       C  
ATOM    829  O   LYS C  13       3.968  83.168  84.749  1.00 83.01           O  
ANISOU  829  O   LYS C  13    12916   8344  10278  -2270  -4369    179       O  
ATOM    830  CB  LYS C  13       2.992  80.609  83.545  1.00 95.79           C  
ANISOU  830  CB  LYS C  13    15243   9296  11857  -3354  -5253   -349       C  
ATOM    831  CG  LYS C  13       2.772  79.131  83.341  1.00115.30           C  
ANISOU  831  CG  LYS C  13    18210  11277  14322  -3898  -5406   -632       C  
ATOM    832  CD  LYS C  13       2.304  78.814  81.937  1.00109.68           C  
ANISOU  832  CD  LYS C  13    17835  10547  13290  -4269  -6177   -922       C  
ATOM    833  CE  LYS C  13       0.940  79.442  81.665  1.00118.57           C  
ANISOU  833  CE  LYS C  13    18067  12126  14857  -4590  -6798   -765       C  
ATOM    834  NZ  LYS C  13       0.128  78.613  80.743  1.00122.21           N1+
ANISOU  834  NZ  LYS C  13    18650  12514  15269  -5169  -7397  -1025       N1+
ATOM    835  H   LYS C  13       1.718  82.485  85.310  1.00112.61           H  
ATOM    836  HA  LYS C  13       3.157  80.236  85.560  1.00109.56           H  
ATOM    837  HB2 LYS C  13       2.284  81.083  83.081  1.00114.95           H  
ATOM    838  HB3 LYS C  13       3.852  80.839  83.159  1.00114.95           H  
ATOM    839  HG2 LYS C  13       3.606  78.660  83.495  1.00138.36           H  
ATOM    840  HG3 LYS C  13       2.094  78.822  83.963  1.00138.36           H  
ATOM    841  HD2 LYS C  13       2.939  79.172  81.297  1.00131.61           H  
ATOM    842  HD3 LYS C  13       2.224  77.853  81.832  1.00131.61           H  
ATOM    843  HE2 LYS C  13       0.456  79.529  82.501  1.00142.28           H  
ATOM    844  HE3 LYS C  13       1.066  80.314  81.258  1.00142.28           H  
ATOM    845  HZ1 LYS C  13      -0.661  79.001  80.601  1.00146.65           H  
ATOM    846  HZ2 LYS C  13       0.549  78.522  79.964  1.00146.65           H  
ATOM    847  HZ3 LYS C  13      -0.005  77.807  81.096  1.00146.65           H  
ATOM    848  N   CYS C  14       5.018  81.744  86.130  1.00 56.46           N  
ANISOU  848  N   CYS C  14     9860   4160   7432   -594   -594   -847       N  
ATOM    849  CA  CYS C  14       6.062  82.696  86.461  1.00 66.43           C  
ANISOU  849  CA  CYS C  14    11058   5688   8493   -331   -622   -682       C  
ATOM    850  C   CYS C  14       7.370  82.083  85.998  1.00 53.47           C  
ANISOU  850  C   CYS C  14     9663   3874   6778   -199   -315   -669       C  
ATOM    851  O   CYS C  14       7.508  80.883  85.988  1.00 56.53           O  
ANISOU  851  O   CYS C  14    10183   3965   7331   -202    -39   -682       O  
ATOM    852  CB  CYS C  14       6.089  82.995  87.971  1.00 62.74           C  
ANISOU  852  CB  CYS C  14    10276   5438   8124    -99   -556   -404       C  
ATOM    853  SG  CYS C  14       4.709  83.985  88.594  1.00 87.47           S  
ANISOU  853  SG  CYS C  14    13047   8872  11314   -189   -910   -455       S  
ATOM    854  H   CYS C  14       5.091  80.985  86.526  1.00 67.75           H  
ATOM    855  HA  CYS C  14       5.917  83.525  85.980  1.00 79.71           H  
ATOM    856  HB2 CYS C  14       6.083  82.152  88.451  1.00 75.29           H  
ATOM    857  HB3 CYS C  14       6.907  83.476  88.174  1.00 75.29           H  
ATOM    858  N   ALA C  15       8.305  82.910  85.557  1.00 59.43           N  
ANISOU  858  N   ALA C  15    10479   4802   7301   -100   -370   -670       N  
ATOM    859  CA  ALA C  15       9.621  82.398  85.225  1.00 54.13           C  
ANISOU  859  CA  ALA C  15     9958   4017   6594     55    -46   -675       C  
ATOM    860  C   ALA C  15      10.627  83.404  85.758  1.00 48.79           C  
ANISOU  860  C   ALA C  15     9091   3628   5818    295    -77   -496       C  
ATOM    861  O   ALA C  15      10.447  84.616  85.588  1.00 50.62           O  
ANISOU  861  O   ALA C  15     9262   4104   5866    224   -379   -489       O  
ATOM    862  CB  ALA C  15       9.783  82.227  83.716  1.00 68.59           C  
ANISOU  862  CB  ALA C  15    12134   5715   8213   -168    -17   -963       C  
ATOM    863  H   ALA C  15       8.205  83.756  85.442  1.00 71.32           H  
ATOM    864  HA  ALA C  15       9.766  81.543  85.660  1.00 64.96           H  
ATOM    865  HB1 ALA C  15      10.671  81.885  83.531  1.00 82.31           H  
ATOM    866  HB2 ALA C  15       9.114  81.602  83.396  1.00 82.31           H  
ATOM    867  HB3 ALA C  15       9.664  83.088  83.286  1.00 82.31           H  
ATOM    868  N   ILE C  16      11.702  82.906  86.342  1.00 50.51           N  
ANISOU  868  N   ILE C  16     9228   3791   6171    576    203   -372       N  
ATOM    869  CA  ILE C  16      12.703  83.825  86.888  1.00 48.15           C  
ANISOU  869  CA  ILE C  16     8719   3753   5824    812    160   -217       C  
ATOM    870  C   ILE C  16      13.469  84.410  85.714  1.00 48.46           C  
ANISOU  870  C   ILE C  16     8899   3878   5636    681    204   -386       C  
ATOM    871  O   ILE C  16      13.888  83.665  84.841  1.00 51.08           O  
ANISOU  871  O   ILE C  16     9440   4026   5944    604    469   -581       O  
ATOM    872  CB  ILE C  16      13.660  83.049  87.800  1.00 57.78           C  
ANISOU  872  CB  ILE C  16     9819   4855   7280   1163    419    -67       C  
ATOM    873  CG1 ILE C  16      12.930  82.653  89.056  1.00 53.63           C  
ANISOU  873  CG1 ILE C  16     9185   4286   6905   1276    361    155       C  
ATOM    874  CG2 ILE C  16      14.826  83.901  88.194  1.00 57.77           C  
ANISOU  874  CG2 ILE C  16     9601   5087   7262   1401    388     32       C  
ATOM    875  CD1 ILE C  16      13.664  81.431  89.854  1.00 60.35           C  
ANISOU  875  CD1 ILE C  16    10061   4861   8008   1581    624    297       C  
ATOM    876  H   ILE C  16      11.880  82.070  86.436  1.00 60.61           H  
ATOM    877  HA  ILE C  16      12.277  84.538  87.389  1.00 57.78           H  
ATOM    878  HB  ILE C  16      13.976  82.255  87.342  1.00 69.34           H  
ATOM    879 HG12 ILE C  16      12.888  83.417  89.651  1.00 64.36           H  
ATOM    880 HG13 ILE C  16      12.034  82.363  88.823  1.00 64.36           H  
ATOM    881 HG21 ILE C  16      15.413  83.386  88.769  1.00 69.33           H  
ATOM    882 HG22 ILE C  16      15.302  84.173  87.394  1.00 69.33           H  
ATOM    883 HG23 ILE C  16      14.500  84.683  88.668  1.00 69.33           H  
ATOM    884 HD11 ILE C  16      13.150  81.221  90.650  1.00 72.42           H  
ATOM    885 HD12 ILE C  16      13.706  80.655  89.273  1.00 72.42           H  
ATOM    886 HD13 ILE C  16      14.559  81.709  90.101  1.00 72.42           H  
ATOM    887  N   ILE C  17      13.780  85.671  85.769  1.00 47.58           N  
ANISOU  887  N   ILE C  17     8669   4034   5375    680    -13   -307       N  
ATOM    888  CA  ILE C  17      14.642  86.280  84.774  1.00 60.44           C  
ANISOU  888  CA  ILE C  17    10420   5760   6785    545     69   -419       C  
ATOM    889  C   ILE C  17      15.694  87.150  85.458  1.00 51.35           C  
ANISOU  889  C   ILE C  17     8979   4836   5695    763     41   -253       C  
ATOM    890  O   ILE C  17      15.474  87.623  86.604  1.00 48.00           O  
ANISOU  890  O   ILE C  17     8306   4539   5394    966   -192    -59       O  
ATOM    891  CB  ILE C  17      13.826  87.141  83.820  1.00 57.04           C  
ANISOU  891  CB  ILE C  17    10236   5397   6040    199   -256   -513       C  
ATOM    892  CG1 ILE C  17      13.131  88.259  84.586  1.00 52.22           C  
ANISOU  892  CG1 ILE C  17     9429   4981   5432    240   -712   -349       C  
ATOM    893  CG2 ILE C  17      12.753  86.257  83.063  1.00 66.90           C  
ANISOU  893  CG2 ILE C  17    11777   6402   7239    -28   -269   -717       C  
ATOM    894  CD1 ILE C  17      12.496  89.326  83.601  1.00 65.68           C  
ANISOU  894  CD1 ILE C  17    11390   6746   6819    -79  -1113   -434       C  
ATOM    895  H   ILE C  17      13.507  86.214  86.378  1.00 57.10           H  
ATOM    896  HA  ILE C  17      15.092  85.589  84.263  1.00 72.53           H  
ATOM    897  HB  ILE C  17      14.424  87.535  83.166  1.00 68.45           H  
ATOM    898 HG12 ILE C  17      12.418  87.882  85.127  1.00 62.67           H  
ATOM    899 HG13 ILE C  17      13.777  88.711  85.150  1.00 62.67           H  
ATOM    900 HG21 ILE C  17      12.245  86.824  82.462  1.00 80.28           H  
ATOM    901 HG22 ILE C  17      13.211  85.567  82.559  1.00 80.28           H  
ATOM    902 HG23 ILE C  17      12.161  85.853  83.716  1.00 80.28           H  
ATOM    903 HD11 ILE C  17      12.064  90.020  84.124  1.00 78.81           H  
ATOM    904 HD12 ILE C  17      13.201  89.712  83.058  1.00 78.81           H  
ATOM    905 HD13 ILE C  17      11.845  88.884  83.035  1.00 78.81           H  
HETATM  906  N   SAR C  18      16.809  87.412  84.778  1.00 52.73           N  
ANISOU  906  N   SAR C  18     9175   5076   5783    709    268   -342       N  
HETATM  907  CA  SAR C  18      17.737  88.425  85.320  1.00 51.13           C  
ANISOU  907  CA  SAR C  18     8692   5100   5637    848    180   -200       C  
HETATM  908  C   SAR C  18      17.592  89.604  84.659  1.00 60.18           C  
ANISOU  908  C   SAR C  18     9972   6389   6505    566    -55   -188       C  
HETATM  909  O   SAR C  18      17.230  89.615  83.519  1.00 66.45           O  
ANISOU  909  O   SAR C  18    11103   7121   7022    250    -26   -326       O  
HETATM  910  CN  SAR C  18      17.202  86.729  83.534  1.00 55.06           C  
ANISOU  910  CN  SAR C  18     9743   5236   5941    518    624   -594       C  
HETATM  911  HN1 SAR C  18      18.003  86.182  83.699  1.00 66.07           H  
HETATM  912  HN2 SAR C  18      16.466  86.150  83.232  1.00 66.07           H  
HETATM  913  HN3 SAR C  18      17.398  87.395  82.845  1.00 66.07           H  
HETATM  914  HA2 SAR C  18      17.870  88.512  86.274  1.00 61.36           H  
HETATM  915  HA3 SAR C  18      18.556  88.032  84.930  1.00 61.36           H  
ATOM    916  N   LEU C  19      17.848  90.706  85.345  1.00 49.87           N  
ANISOU  916  N   LEU C  19     8437   5269   5242    661   -342    -19       N  
ATOM    917  CA  LEU C  19      17.851  92.055  84.769  1.00 51.15           C  
ANISOU  917  CA  LEU C  19     8721   5563   5151    388   -625     30       C  
ATOM    918  C   LEU C  19      19.233  92.606  85.025  1.00 59.63           C  
ANISOU  918  C   LEU C  19     9521   6776   6359    480   -472     93       C  
ATOM    919  O   LEU C  19      19.563  92.914  86.136  1.00 51.36           O  
ANISOU  919  O   LEU C  19     8142   5820   5553    774   -627    220       O  
ATOM    920  CB  LEU C  19      16.792  92.959  85.389  1.00 51.70           C  
ANISOU  920  CB  LEU C  19     8750   5706   5189    416  -1183    152       C  
ATOM    921  CG  LEU C  19      15.377  92.445  85.216  1.00 65.11           C  
ANISOU  921  CG  LEU C  19    10639   7280   6818    331  -1355     66       C  
ATOM    922  CD1 LEU C  19      14.452  93.329  85.949  1.00 86.56           C  
ANISOU  922  CD1 LEU C  19    13222  10099   9568    414  -1866    150       C  
ATOM    923  CD2 LEU C  19      15.054  92.445  83.725  1.00 75.67           C  
ANISOU  923  CD2 LEU C  19    12421   8505   7826    -62  -1341    -86       C  
ATOM    924  H   LEU C  19      18.033  90.704  86.185  1.00 59.84           H  
ATOM    925  HA  LEU C  19      17.703  92.007  83.811  1.00 61.38           H  
ATOM    926  HB2 LEU C  19      16.965  93.037  86.340  1.00 62.04           H  
ATOM    927  HB3 LEU C  19      16.843  93.833  84.972  1.00 62.04           H  
ATOM    928  HG  LEU C  19      15.301  91.542  85.562  1.00 78.13           H  
ATOM    929 HD11 LEU C  19      13.546  92.999  85.837  1.00103.87           H  
ATOM    930 HD12 LEU C  19      14.692  93.327  86.888  1.00103.87           H  
ATOM    931 HD13 LEU C  19      14.524  94.227  85.590  1.00103.87           H  
ATOM    932 HD21 LEU C  19      14.150  92.117  83.598  1.00 90.81           H  
ATOM    933 HD22 LEU C  19      15.130  93.350  83.386  1.00 90.81           H  
ATOM    934 HD23 LEU C  19      15.683  91.866  83.266  1.00 90.81           H  
ATOM    935  N   MET C  20      20.041  92.720  83.994  1.00 51.52           N  
ANISOU  935  N   MET C  20     8631   5771   5174    219   -159    -11       N  
ATOM    936  CA  MET C  20      21.452  93.000  84.142  1.00 61.23           C  
ANISOU  936  CA  MET C  20     9554   7120   6591    290    107    -12       C  
ATOM    937  C   MET C  20      21.682  94.491  83.994  1.00 65.14           C  
ANISOU  937  C   MET C  20    10057   7749   6944     53   -197    133       C  
ATOM    938  O   MET C  20      21.085  95.118  83.128  1.00 60.23           O  
ANISOU  938  O   MET C  20     9821   7101   5962   -307   -388    157       O  
ATOM    939  CB  MET C  20      22.253  92.254  83.087  1.00 64.70           C  
ANISOU  939  CB  MET C  20    10105   7523   6953    121    689   -241       C  
ATOM    940  CG  MET C  20      23.731  92.403  83.294  1.00 78.63           C  
ANISOU  940  CG  MET C  20    11468   9414   8993    227   1009   -293       C  
ATOM    941  SD  MET C  20      24.660  91.462  82.098  1.00 89.57           S  
ANISOU  941  SD  MET C  20    12931  10781  10321     65   1739   -625       S  
ATOM    942  CE  MET C  20      25.724  90.587  83.258  1.00 97.57           C  
ANISOU  942  CE  MET C  20    13342  11765  11966    638   1935   -718       C  
ATOM    943  H   MET C  20      19.790  92.636  83.176  1.00 61.83           H  
ATOM    944  HA  MET C  20      21.750  92.711  85.019  1.00 73.48           H  
ATOM    945  HB2 MET C  20      22.036  91.310  83.130  1.00 77.64           H  
ATOM    946  HB3 MET C  20      22.034  92.609  82.211  1.00 77.64           H  
ATOM    947  HG2 MET C  20      23.974  93.337  83.200  1.00 94.35           H  
ATOM    948  HG3 MET C  20      23.963  92.082  84.179  1.00 94.35           H  
ATOM    949  HE1 MET C  20      26.320  90.005  82.762  1.00117.08           H  
ATOM    950  HE2 MET C  20      26.239  91.235  83.764  1.00117.08           H  
ATOM    951  HE3 MET C  20      25.171  90.062  83.858  1.00117.08           H  
ATOM    952  N   VAL C  21      22.541  95.052  84.847  1.00 51.50           N  
ANISOU  952  N   VAL C  21     7922   6139   5507    260   -277    229       N  
ATOM    953  CA  VAL C  21      22.932  96.466  84.773  1.00 65.95           C  
ANISOU  953  CA  VAL C  21     9712   8075   7271     43   -550    365       C  
ATOM    954  C   VAL C  21      24.443  96.476  84.944  1.00 62.39           C  
ANISOU  954  C   VAL C  21     8853   7728   7124    115   -190    306       C  
ATOM    955  O   VAL C  21      24.944  96.493  86.083  1.00 60.72           O  
ANISOU  955  O   VAL C  21     8217   7568   7285    496   -323    350       O  
ATOM    956  CB  VAL C  21      22.247  97.332  85.861  1.00 64.48           C  
ANISOU  956  CB  VAL C  21     9397   7923   7182    262  -1179    539       C  
ATOM    957  CG1 VAL C  21      22.682  98.784  85.740  1.00 62.12           C  
ANISOU  957  CG1 VAL C  21     9078   7689   6835     27  -1481    667       C  
ATOM    958  CG2 VAL C  21      20.740  97.184  85.795  1.00 62.10           C  
ANISOU  958  CG2 VAL C  21     9404   7529   6663    244  -1503    545       C  
ATOM    959  H   VAL C  21      22.919  94.626  85.491  1.00 61.80           H  
ATOM    960  HA  VAL C  21      22.712  96.825  83.900  1.00 79.14           H  
ATOM    961  HB  VAL C  21      22.532  97.014  86.732  1.00 77.38           H  
ATOM    962 HG11 VAL C  21      22.240  99.303  86.430  1.00 74.54           H  
ATOM    963 HG12 VAL C  21      23.644  98.835  85.852  1.00 74.54           H  
ATOM    964 HG13 VAL C  21      22.432  99.116  84.864  1.00 74.54           H  
ATOM    965 HG21 VAL C  21      20.339  97.736  86.485  1.00 74.52           H  
ATOM    966 HG22 VAL C  21      20.433  97.472  84.921  1.00 74.52           H  
ATOM    967 HG23 VAL C  21      20.508  96.253  85.938  1.00 74.52           H  
TER
HETATM  968  N   ORN D   1      23.310 116.283  99.274  1.00 63.98           N  
ANISOU  968  N   ORN D   1     6415  11984   5911  -1545    391    305       N  
HETATM  969  CA  ORN D   1      22.496 115.151  98.781  1.00 72.60           C  
ANISOU  969  CA  ORN D   1     7917  12414   7256  -1024    613    338       C  
HETATM  970  C   ORN D   1      21.054 115.476  99.108  1.00 55.49           C  
ANISOU  970  C   ORN D   1     6142   9730   5213  -1270    496   -147       C  
HETATM  971  O   ORN D   1      20.756 116.396  99.890  1.00 60.86           O  
ANISOU  971  O   ORN D   1     6756  10585   5784  -1751    347   -446       O  
HETATM  972  CB  ORN D   1      22.847 113.817  99.518  1.00 64.81           C  
ANISOU  972  CB  ORN D   1     6663  11772   6189   -564    776    898       C  
HETATM  973  CG  ORN D   1      24.073 113.071  99.020  1.00 71.71           C  
ANISOU  973  CG  ORN D   1     7214  12905   7129    -73   1096   1546       C  
HETATM  974  CD  ORN D   1      23.879 112.205  97.717  1.00 67.06           C  
ANISOU  974  CD  ORN D   1     7179  11500   6799    439   1566   1573       C  
HETATM  975  NE  ORN D   1      22.933 111.102  97.906  1.00 66.66           N  
ANISOU  975  NE  ORN D   1     7550  10957   6822    742   1745   1543       N  
HETATM  976  HA  ORN D   1      22.615 115.110  97.694  1.00 87.13           H  
HETATM  977  HB2 ORN D   1      22.975 114.013 100.591  1.00 77.77           H  
HETATM  978  HB3 ORN D   1      21.997 113.137  99.363  1.00 77.77           H  
HETATM  979  HG2 ORN D   1      24.411 112.402  99.820  1.00 86.06           H  
HETATM  980  HG3 ORN D   1      24.867 113.803  98.833  1.00 86.06           H  
HETATM  981  HD2 ORN D   1      23.507 112.854  96.919  1.00 80.47           H  
HETATM  982  HD3 ORN D   1      24.848 111.778  97.441  1.00 80.47           H  
HETATM  983  HE1 ORN D   1      23.324 110.243  98.287  1.00 79.99           H  
HETATM  984  H1  ORN D   1      24.270 116.275  98.922  1.00 76.78           H  
HETATM  985  H2  ORN D   1      22.933 117.196  99.010  1.00 76.78           H  
HETATM  986  H3  ORN D   1      23.393 116.308 100.293  1.00 76.78           H  
ATOM    987  N   LEU D   2      20.145 114.648  98.524  1.00 51.86           N  
ANISOU  987  N   LEU D   2     6121   8601   4983   -949    619   -177       N  
ATOM    988  CA  LEU D   2      18.717 114.757  98.752  1.00 48.90           C  
ANISOU  988  CA  LEU D   2     6071   7697   4812  -1099    529   -482       C  
ATOM    989  C   LEU D   2      18.335 113.793  99.861  1.00 53.22           C  
ANISOU  989  C   LEU D   2     6557   8402   5263   -872    576   -312       C  
ATOM    990  O   LEU D   2      18.850 112.689  99.918  1.00 54.68           O  
ANISOU  990  O   LEU D   2     6668   8758   5349   -453    739     61       O  
ATOM    991  CB  LEU D   2      17.912 114.424  97.515  1.00 46.55           C  
ANISOU  991  CB  LEU D   2     6268   6650   4771  -1009    554   -540       C  
ATOM    992  CG  LEU D   2      18.216 115.356  96.332  1.00 46.49           C  
ANISOU  992  CG  LEU D   2     6358   6447   4859  -1260    491   -685       C  
ATOM    993  CD1 LEU D   2      17.468 114.728  95.113  1.00 52.20           C  
ANISOU  993  CD1 LEU D   2     7643   6477   5715  -1221    504   -632       C  
ATOM    994  CD2 LEU D   2      17.884 116.778  96.610  1.00 58.71           C  
ANISOU  994  CD2 LEU D   2     7734   8013   6559  -1706    341   -989       C  
ATOM    995  H   LEU D   2      20.358 113.997  98.005  1.00 62.24           H  
ATOM    996  HA  LEU D   2      18.498 115.659  99.034  1.00 58.68           H  
ATOM    997  HB2 LEU D   2      18.116 113.517  97.241  1.00 55.87           H  
ATOM    998  HB3 LEU D   2      16.968 114.504  97.722  1.00 55.87           H  
ATOM    999  HG  LEU D   2      19.167 115.312  96.143  1.00 55.79           H  
ATOM   1000 HD11 LEU D   2      17.625 115.278  94.329  1.00 62.64           H  
ATOM   1001 HD12 LEU D   2      17.807 113.832  94.962  1.00 62.64           H  
ATOM   1002 HD13 LEU D   2      16.519 114.694  95.309  1.00 62.64           H  
ATOM   1003 HD21 LEU D   2      18.098 117.310  95.828  1.00 70.45           H  
ATOM   1004 HD22 LEU D   2      16.937 116.847  96.808  1.00 70.45           H  
ATOM   1005 HD23 LEU D   2      18.404 117.081  97.370  1.00 70.45           H  
ATOM   1006  N   VAL D   3      17.434 114.217 100.737  1.00 46.70           N  
ANISOU 1006  N   VAL D   3     5308   7075   5359   -544    778   -907       N  
ATOM   1007  CA  VAL D   3      16.961 113.280 101.721  1.00 44.04           C  
ANISOU 1007  CA  VAL D   3     5068   6816   4848   -410    780   -789       C  
ATOM   1008  C   VAL D   3      15.473 113.230 101.475  1.00 48.48           C  
ANISOU 1008  C   VAL D   3     5882   6845   5693   -285   1004   -909       C  
ATOM   1009  O   VAL D   3      14.784 114.258 101.556  1.00 46.29           O  
ANISOU 1009  O   VAL D   3     5746   6277   5563   -499   1174  -1203       O  
ATOM   1010  CB  VAL D   3      17.273 113.714 103.122  1.00 51.32           C  
ANISOU 1010  CB  VAL D   3     6049   8099   5350   -801    715   -895       C  
ATOM   1011  CG1 VAL D   3      16.651 112.734 104.081  1.00 66.67           C  
ANISOU 1011  CG1 VAL D   3     8123  10113   7097   -718    722   -751       C  
ATOM   1012  CG2 VAL D   3      18.791 113.824 103.324  1.00 50.76           C  
ANISOU 1012  CG2 VAL D   3     5682   8577   5028   -980    431   -705       C  
ATOM   1013  HA  VAL D   3      17.343 112.403 101.563  1.00 52.84           H  
ATOM   1014  HB  VAL D   3      16.880 114.587 103.281  1.00 61.58           H  
ATOM   1015 HG11 VAL D   3      16.851 113.012 104.988  1.00 80.01           H  
ATOM   1016 HG12 VAL D   3      15.691 112.722 103.941  1.00 80.01           H  
ATOM   1017 HG13 VAL D   3      17.021 111.853 103.915  1.00 80.01           H  
ATOM   1018 HG21 VAL D   3      18.968 114.106 104.235  1.00 60.91           H  
ATOM   1019 HG22 VAL D   3      19.194 112.957 103.160  1.00 60.91           H  
ATOM   1020 HG23 VAL D   3      19.145 114.477 102.701  1.00 60.91           H  
ATOM   1021  H   VAL D   3      16.999 114.959 100.722  1.00 56.04           H  
ATOM   1022  N   PHE D   4      14.959 112.041 101.179  1.00 40.86           N  
ANISOU 1022  N   PHE D   4     4960   5721   4845     60    997   -669       N  
ATOM   1023  CA  PHE D   4      13.544 111.807 101.084  1.00 42.16           C  
ANISOU 1023  CA  PHE D   4     5327   5449   5243    162   1164   -689       C  
ATOM   1024  C   PHE D   4      13.039 111.191 102.388  1.00 49.30           C  
ANISOU 1024  C   PHE D   4     6330   6531   5870    113   1198   -628       C  
ATOM   1025  O   PHE D   4      13.793 110.649 103.193  1.00 48.60           O  
ANISOU 1025  O   PHE D   4     6170   6864   5432     63   1022   -470       O  
ATOM   1026  CB  PHE D   4      13.240 110.850  99.915  1.00 49.57           C  
ANISOU 1026  CB  PHE D   4     6307   6086   6440    498   1106   -442       C  
ATOM   1027  CG  PHE D   4      13.635 111.380  98.585  1.00 50.08           C  
ANISOU 1027  CG  PHE D   4     6316   5992   6718    483   1092   -488       C  
ATOM   1028  CD2 PHE D   4      12.748 112.109  97.830  1.00 52.40           C  
ANISOU 1028  CD2 PHE D   4     6717   5847   7344    356   1171   -570       C  
ATOM   1029  CD1 PHE D   4      14.894 111.149  98.094  1.00 53.39           C  
ANISOU 1029  CD1 PHE D   4     6550   6718   7018    569    995   -419       C  
ATOM   1030  CE2 PHE D   4      13.127 112.607  96.615  1.00 47.71           C  
ANISOU 1030  CE2 PHE D   4     6093   5142   6893    255   1118   -572       C  
ATOM   1031  CE1 PHE D   4      15.269 111.665  96.875  1.00 55.06           C  
ANISOU 1031  CE1 PHE D   4     6716   6844   7362    485   1009   -469       C  
ATOM   1032  CZ  PHE D   4      14.384 112.389  96.167  1.00 45.13           C  
ANISOU 1032  CZ  PHE D   4     5613   5168   6367    300   1053   -539       C  
ATOM   1033  HA  PHE D   4      13.080 112.646 100.933  1.00 50.59           H  
ATOM   1034  HB2 PHE D   4      13.721 110.020 100.057  1.00 59.48           H  
ATOM   1035  HB3 PHE D   4      12.286 110.677  99.893  1.00 59.48           H  
ATOM   1036  HD2 PHE D   4      11.891 112.273  98.152  1.00 62.87           H  
ATOM   1037  HD1 PHE D   4      15.506 110.665  98.599  1.00 64.07           H  
ATOM   1038  HE2 PHE D   4      12.529 113.107  96.107  1.00 57.25           H  
ATOM   1039  HE1 PHE D   4      16.124 111.513  96.543  1.00 66.08           H  
ATOM   1040  HZ  PHE D   4      14.631 112.719  95.334  1.00 54.16           H  
ATOM   1041  N   PHE D   5      11.749 111.297 102.604  1.00 42.19           N  
ANISOU 1041  N   PHE D   5     5572   5325   5135     90   1415   -725       N  
ATOM   1042  CA  PHE D   5      11.175 110.784 103.822  1.00 44.20           C  
ANISOU 1042  CA  PHE D   5     5925   5772   5098    -21   1499   -688       C  
ATOM   1043  C   PHE D   5      10.112 109.773 103.540  1.00 53.72           C  
ANISOU 1043  C   PHE D   5     7211   6697   6501    209   1509   -415       C  
ATOM   1044  O   PHE D   5       9.332 109.916 102.589  1.00 47.32           O  
ANISOU 1044  O   PHE D   5     6418   5442   6120    350   1591   -397       O  
ATOM   1045  CB  PHE D   5      10.614 111.914 104.625  1.00 56.56           C  
ANISOU 1045  CB  PHE D   5     7569   7321   6601   -338   1827  -1112       C  
ATOM   1046  CG  PHE D   5      11.637 112.893 105.010  1.00 67.17           C  
ANISOU 1046  CG  PHE D   5     8899   8934   7690   -637   1789  -1382       C  
ATOM   1047  CD1 PHE D   5      12.408 112.677 106.134  1.00 72.04           C  
ANISOU 1047  CD1 PHE D   5     9553  10084   7734   -927   1652  -1345       C  
ATOM   1048  CD2 PHE D   5      11.857 114.003 104.234  1.00 73.59           C  
ANISOU 1048  CD2 PHE D   5     9666   9473   8821   -681   1832  -1615       C  
ATOM   1049  CE1 PHE D   5      13.381 113.570 106.493  1.00 76.40           C  
ANISOU 1049  CE1 PHE D   5    10106  10903   8020  -1264   1570  -1555       C  
ATOM   1050  CE2 PHE D   5      12.835 114.913 104.575  1.00 74.10           C  
ANISOU 1050  CE2 PHE D   5     9735   9785   8636  -1001   1757  -1838       C  
ATOM   1051  CZ  PHE D   5      13.603 114.692 105.710  1.00 67.36           C  
ANISOU 1051  CZ  PHE D   5     8926   9475   7194  -1296   1629  -1812       C  
ATOM   1052  H   PHE D   5      11.186 111.660 102.064  1.00 50.63           H  
ATOM   1053  HA  PHE D   5      11.870 110.355 104.346  1.00 53.04           H  
ATOM   1054  HB2 PHE D   5       9.942 112.373 104.098  1.00 67.88           H  
ATOM   1055  HB3 PHE D   5      10.217 111.559 105.436  1.00 67.88           H  
ATOM   1056  HD1 PHE D   5      12.262 111.920 106.655  1.00 86.44           H  
ATOM   1057  HD2 PHE D   5      11.343 114.142 103.471  1.00 88.31           H  
ATOM   1058  HE1 PHE D   5      13.894 113.422 107.255  1.00 91.68           H  
ATOM   1059  HE2 PHE D   5      12.978 115.668 104.051  1.00 88.92           H  
ATOM   1060  HZ  PHE D   5      14.259 115.305 105.953  1.00 80.84           H  
ATOM   1061  N   ALA D   6      10.099 108.761 104.384  1.00 43.93           N  
ANISOU 1061  N   ALA D   6     6027   5729   4936    193   1381   -163       N  
ATOM   1062  CA  ALA D   6       9.103 107.729 104.272  1.00 46.84           C  
ANISOU 1062  CA  ALA D   6     6495   5875   5427    348   1350    135       C  
ATOM   1063  C   ALA D   6       8.721 107.238 105.632  1.00 46.76           C  
ANISOU 1063  C   ALA D   6     6558   6211   4996    100   1378    235       C  
ATOM   1064  O   ALA D   6       9.524 107.226 106.576  1.00 50.02           O  
ANISOU 1064  O   ALA D   6     6961   7076   4966   -132   1255    239       O  
ATOM   1065  CB  ALA D   6       9.607 106.511 103.481  1.00 52.67           C  
ANISOU 1065  CB  ALA D   6     7264   6478   6271    683   1014    514       C  
ATOM   1066  H   ALA D   6      10.657 108.651 105.030  1.00 52.72           H  
ATOM   1067  HA  ALA D   6       8.313 108.082 103.834  1.00 56.21           H  
ATOM   1068  HB1 ALA D   6       8.899 105.849 103.436  1.00 63.21           H  
ATOM   1069  HB2 ALA D   6       9.851 106.795 102.587  1.00 63.21           H  
ATOM   1070  HB3 ALA D   6      10.380 106.139 103.934  1.00 63.21           H  
ATOM   1071  N   GLU D   7       7.520 106.707 105.689  1.00 45.61           N  
ANISOU 1071  N   GLU D   7     6485   5873   4972    120   1483    395       N  
ATOM   1072  CA  GLU D   7       7.104 105.989 106.862  1.00 48.73           C  
ANISOU 1072  CA  GLU D   7     6961   6598   4956   -122   1459    598       C  
ATOM   1073  C   GLU D   7       7.471 104.526 106.679  1.00 60.13           C  
ANISOU 1073  C   GLU D   7     8484   8014   6347     75    993   1126       C  
ATOM   1074  O   GLU D   7       7.041 103.885 105.727  1.00 57.14           O  
ANISOU 1074  O   GLU D   7     8170   7220   6321    356    868   1350       O  
ATOM   1075  CB  GLU D   7       5.611 106.189 107.126  1.00 70.21           C  
ANISOU 1075  CB  GLU D   7     9675   9183   7820   -244   1840    509       C  
ATOM   1076  CG  GLU D   7       5.292 106.338 108.584  1.00 89.27           C  
ANISOU 1076  CG  GLU D   7    12132  12076   9710   -675   2096    358       C  
ATOM   1077  CD  GLU D   7       3.811 106.525 108.815  1.00 96.89           C  
ANISOU 1077  CD  GLU D   7    13020  12926  10867   -763   2538    261       C  
ATOM   1078  OE1 GLU D   7       3.060 106.418 107.811  1.00 95.53           O  
ANISOU 1078  OE1 GLU D   7    12752  12286  11259   -481   2540    415       O  
ATOM   1079  OE2 GLU D   7       3.420 106.757 109.987  1.00 94.21           O1-
ANISOU 1079  OE2 GLU D   7    12709  12980  10106  -1138   2876     49       O1-
ATOM   1080  H   GLU D   7       6.930 106.750 105.065  1.00 54.73           H  
ATOM   1081  HA  GLU D   7       7.591 106.326 107.629  1.00 58.48           H  
ATOM   1082  HB2 GLU D   7       5.314 106.993 106.671  1.00 84.25           H  
ATOM   1083  HB3 GLU D   7       5.125 105.419 106.790  1.00 84.25           H  
ATOM   1084  HG2 GLU D   7       5.574 105.540 109.056  1.00107.12           H  
ATOM   1085  HG3 GLU D   7       5.754 107.116 108.934  1.00107.12           H  
ATOM   1086  N   ASP D   8       8.282 104.010 107.581  1.00 53.94           N  
ANISOU 1086  N   ASP D   8     7709   7645   5140    -95    712   1335       N  
ATOM   1087  CA  ASP D   8       8.854 102.682 107.438  1.00 63.65           C  
ANISOU 1087  CA  ASP D   8     8976   8816   6394    130    227   1833       C  
ATOM   1088  C   ASP D   8       7.957 101.740 108.228  1.00 61.62           C  
ANISOU 1088  C   ASP D   8     8867   8651   5895   -100    107   2202       C  
ATOM   1089  O   ASP D   8       7.938 101.809 109.450  1.00 71.09           O  
ANISOU 1089  O   ASP D   8    10087  10322   6601   -537    113   2242       O  
ATOM   1090  CB  ASP D   8      10.287 102.632 107.964  1.00 68.70           C  
ANISOU 1090  CB  ASP D   8     9475   9838   6790     69    -85   1947       C  
ATOM   1091  CG  ASP D   8      10.952 101.272 107.707  1.00 80.27           C  
ANISOU 1091  CG  ASP D   8    10915  11147   8438    402   -580   2457       C  
ATOM   1092  OD1 ASP D   8      10.207 100.323 107.351  1.00 80.67           O  
ANISOU 1092  OD1 ASP D   8    11137  10835   8677    576   -691   2720       O  
ATOM   1093  OD2 ASP D   8      12.203 101.157 107.824  1.00 83.26           O1-
ANISOU 1093  OD2 ASP D   8    11091  11728   8817    498   -857   2596       O1-
ATOM   1094  H   ASP D   8       8.523 104.415 108.301  1.00 64.73           H  
ATOM   1095  HA  ASP D   8       8.849 102.417 106.505  1.00 76.39           H  
ATOM   1096  HB2 ASP D   8      10.813 103.315 107.518  1.00 82.44           H  
ATOM   1097  HB3 ASP D   8      10.280 102.789 108.921  1.00 82.44           H  
ATOM   1098  N   CYS D   9       7.172 100.934 107.524  1.00110.46           N  
ANISOU 1098  N   CYS D   9    10345  19873  11750  -1498  -1729   2543       N  
ATOM   1099  CA  CYS D   9       6.222 100.020 108.132  1.00111.78           C  
ANISOU 1099  CA  CYS D   9    11107  18119  13244   -558  -1274   3339       C  
ATOM   1100  C   CYS D   9       6.723  98.578 108.116  1.00115.86           C  
ANISOU 1100  C   CYS D   9    12135  19028  12860    918  -1492   2919       C  
ATOM   1101  O   CYS D   9       5.925  97.647 108.234  1.00117.78           O  
ANISOU 1101  O   CYS D   9    12856  17583  14311   1544  -1436   3592       O  
ATOM   1102  CB  CYS D   9       4.889 100.148 107.396  1.00109.92           C  
ANISOU 1102  CB  CYS D   9    10860  15727  15177  -1658  -1659   4323       C  
ATOM   1103  SG  CYS D   9       4.457 101.878 107.001  1.00112.53           S  
ANISOU 1103  SG  CYS D   9    10539  15882  16334  -3629  -1767   4620       S  
ATOM   1104  H   CYS D   9       7.175 100.899 106.665  1.00132.55           H  
ATOM   1105  HA  CYS D   9       6.081 100.279 109.056  1.00134.13           H  
ATOM   1106  HB2 CYS D   9       4.940  99.654 106.563  1.00131.90           H  
ATOM   1107  HB3 CYS D   9       4.184  99.783 107.955  1.00131.90           H  
ATOM   1108  HG  CYS D   9       5.313 102.343 106.300  1.00135.03           H  
ATOM   1109  N   GLY D  10       8.034  98.372 107.952  1.00121.16           N  
ANISOU 1109  N   GLY D  10    12680  21875  11480   1477  -1777   1829       N  
ATOM   1110  CA  GLY D  10       8.561  97.017 107.922  1.00122.00           C  
ANISOU 1110  CA  GLY D  10    13281  22439  10636   2921  -2039   1353       C  
ATOM   1111  C   GLY D  10       8.313  96.282 109.222  1.00143.23           C  
ANISOU 1111  C   GLY D  10    16553  24305  13562   4397  -1201   1711       C  
ATOM   1112  O   GLY D  10       7.992  95.090 109.222  1.00148.39           O  
ANISOU 1112  O   GLY D  10    17765  23974  14644   5360  -1353   1975       O  
ATOM   1113  H   GLY D  10       8.624  98.991 107.859  1.00145.39           H  
ATOM   1114  HA2 GLY D  10       8.140  96.522 107.202  1.00146.40           H  
ATOM   1115  HA3 GLY D  10       9.517  97.045 107.761  1.00146.40           H  
ATOM   1116  N   SER D  11       8.467  96.984 110.345  1.00149.83           N  
ANISOU 1116  N   SER D  11    17303  25521  14104   4631   -338   1726       N  
ATOM   1117  CA  SER D  11       8.029  96.530 111.654  1.00149.59           C  
ANISOU 1117  CA  SER D  11    17839  24470  14529   5877    627   2289       C  
ATOM   1118  C   SER D  11       6.535  96.810 111.829  1.00145.56           C  
ANISOU 1118  C   SER D  11    17393  21560  16352   5206   1108   3644       C  
ATOM   1119  O   SER D  11       5.899  97.475 111.001  1.00126.08           O  
ANISOU 1119  O   SER D  11    14505  18331  15068   3736    672   4048       O  
ATOM   1120  CB  SER D  11       8.831  97.242 112.744  1.00148.84           C  
ANISOU 1120  CB  SER D  11    17659  25821  13074   6430   1269   1681       C  
ATOM   1121  OG  SER D  11       9.219  98.538 112.286  1.00143.15           O  
ANISOU 1121  OG  SER D  11    16206  26180  12006   5038    938   1249       O  
ATOM   1122  H   SER D  11       8.839  97.759 110.368  1.00179.80           H  
ATOM   1123  HA  SER D  11       8.177  95.575 111.734  1.00179.51           H  
ATOM   1124  HB2 SER D  11       8.281  97.335 113.537  1.00178.61           H  
ATOM   1125  HB3 SER D  11       9.626  96.724 112.945  1.00178.61           H  
ATOM   1126  HG  SER D  11       8.537  98.994 112.104  1.00171.78           H  
ATOM   1127  N   ASN D  12       5.968  96.297 112.930  1.00150.09           N  
ANISOU 1127  N   ASN D  12    18495  20933  17598   6332   2043   4379       N  
ATOM   1128  CA  ASN D  12       4.602  96.675 113.293  1.00152.43           C  
ANISOU 1128  CA  ASN D  12    18777  19102  20038   5811   2720   5693       C  
ATOM   1129  C   ASN D  12       4.511  98.173 113.556  1.00148.13           C  
ANISOU 1129  C   ASN D  12    17765  18940  19577   4779   3056   5672       C  
ATOM   1130  O   ASN D  12       3.683  98.869 112.957  1.00139.49           O  
ANISOU 1130  O   ASN D  12    16258  16764  19978   3394   2826   6263       O  
ATOM   1131  CB  ASN D  12       4.131  95.887 114.514  1.00147.50           C  
ANISOU 1131  CB  ASN D  12    18798  17355  19890   7340   3806   6481       C  
ATOM   1132  CG  ASN D  12       3.819  94.437 114.184  1.00164.28           C  
ANISOU 1132  CG  ASN D  12    21320  18478  22622   7856   3403   6704       C  
ATOM   1133  ND2 ASN D  12       3.874  93.568 115.196  1.00165.23           N  
ANISOU 1133  ND2 ASN D  12    21969  18606  22205   8659   3986   6494       N  
ATOM   1134  OD1 ASN D  12       3.519  94.103 113.035  1.00165.00           O  
ANISOU 1134  OD1 ASN D  12    21214  17923  23556   7119   2429   6800       O  
ATOM   1135  H   ASN D  12       6.345  95.742 113.468  1.00180.11           H  
ATOM   1136  HA  ASN D  12       4.010  96.464 112.554  1.00182.92           H  
ATOM   1137  HB2 ASN D  12       4.828  95.899 115.188  1.00177.00           H  
ATOM   1138  HB3 ASN D  12       3.324  96.296 114.863  1.00177.00           H  
ATOM   1139 HD21 ASN D  12       3.705  92.736 115.058  1.00198.28           H  
ATOM   1140 HD22 ASN D  12       4.078  93.840 115.986  1.00198.28           H  
ATOM   1141  N   LYS D  13       5.372  98.688 114.440  1.00145.57           N  
ANISOU 1141  N   LYS D  13    17514  20131  17663   5452   3514   4955       N  
ATOM   1142  CA  LYS D  13       5.461 100.128 114.653  1.00131.26           C  
ANISOU 1142  CA  LYS D  13    15260  18896  15717   4502   3643   4742       C  
ATOM   1143  C   LYS D  13       5.898 100.827 113.372  1.00118.38           C  
ANISOU 1143  C   LYS D  13    12926  18246  13806   2882   2569   4136       C  
ATOM   1144  O   LYS D  13       6.873 100.433 112.723  1.00125.61           O  
ANISOU 1144  O   LYS D  13    13691  20664  13372   2954   1854   3244       O  
ATOM   1145  CB  LYS D  13       6.436 100.445 115.797  1.00123.75           C  
ANISOU 1145  CB  LYS D  13    14556  19488  12975   5651   4131   3931       C  
ATOM   1146  CG  LYS D  13       7.930 100.384 115.454  1.00131.43           C  
ANISOU 1146  CG  LYS D  13    15271  22803  11863   5840   3382   2535       C  
ATOM   1147  CD  LYS D  13       8.577 101.773 115.292  1.00133.00           C  
ANISOU 1147  CD  LYS D  13    14800  24364  11370   4709   2966   1817       C  
ATOM   1148  CE  LYS D  13      10.103 101.674 115.103  1.00138.96           C  
ANISOU 1148  CE  LYS D  13    15245  27479  10074   5072   2345    473       C  
ATOM   1149  NZ  LYS D  13      10.807 102.905 115.582  1.00141.21           N1+
ANISOU 1149  NZ  LYS D  13    15138  28470  10047   4473   2025   -175       N1+
ATOM   1150  H   LYS D  13       5.910  98.225 114.925  1.00174.68           H  
ATOM   1151  HA  LYS D  13       4.586 100.467 114.899  1.00157.51           H  
ATOM   1152  HB2 LYS D  13       6.250 101.343 116.115  1.00148.50           H  
ATOM   1153  HB3 LYS D  13       6.279  99.812 116.515  1.00148.50           H  
ATOM   1154  HG2 LYS D  13       8.397  99.919 116.165  1.00157.71           H  
ATOM   1155  HG3 LYS D  13       8.040  99.905 114.618  1.00157.71           H  
ATOM   1156  HD2 LYS D  13       8.203 102.211 114.511  1.00159.60           H  
ATOM   1157  HD3 LYS D  13       8.404 102.301 116.087  1.00159.60           H  
ATOM   1158  HE2 LYS D  13      10.439 100.917 115.609  1.00166.75           H  
ATOM   1159  HE3 LYS D  13      10.301 101.559 114.160  1.00166.75           H  
ATOM   1160  HZ1 LYS D  13      11.684 102.820 115.461  1.00169.46           H  
ATOM   1161  HZ2 LYS D  13      10.519 103.615 115.128  1.00169.46           H  
ATOM   1162  HZ3 LYS D  13      10.645 103.030 116.448  1.00169.46           H  
ATOM   1163  N   CYS D  14       5.160 101.852 112.989  1.00112.84           N  
ANISOU 1163  N   CYS D  14    11806  16679  14389   1449   2472   4658       N  
ATOM   1164  CA  CYS D  14       5.653 102.716 111.940  1.00122.52           C  
ANISOU 1164  CA  CYS D  14    12380  18988  15185    -65   1576   4079       C  
ATOM   1165  C   CYS D  14       6.570 103.757 112.552  1.00123.95           C  
ANISOU 1165  C   CYS D  14    12265  20812  14019   -140   1693   3280       C  
ATOM   1166  O   CYS D  14       6.503 104.055 113.753  1.00120.72           O  
ANISOU 1166  O   CYS D  14    12159  20253  13458    705   2458   3363       O  
ATOM   1167  CB  CYS D  14       4.517 103.383 111.187  1.00106.20           C  
ANISOU 1167  CB  CYS D  14     9994  15322  15035  -1626   1289   4926       C  
ATOM   1168  SG  CYS D  14       3.631 102.199 110.215  1.00109.95           S  
ANISOU 1168  SG  CYS D  14    10706  14099  16971  -1712    771   5640       S  
ATOM   1169  H   CYS D  14       4.392 102.064 113.311  1.00135.41           H  
ATOM   1170  HA  CYS D  14       6.169 102.190 111.308  1.00147.03           H  
ATOM   1171  HB2 CYS D  14       3.900 103.783 111.820  1.00127.44           H  
ATOM   1172  HB3 CYS D  14       4.877 104.060 110.592  1.00127.44           H  
ATOM   1173  HG  CYS D  14       4.385 101.698 109.427  1.00131.94           H  
ATOM   1174  N   ALA D  15       7.473 104.250 111.721  1.00 57.58           N  
ANISOU 1174  N   ALA D  15     8192   7396   6291   1073   1327    336       N  
ATOM   1175  CA  ALA D  15       8.353 105.349 112.062  1.00 60.34           C  
ANISOU 1175  CA  ALA D  15     8365   8235   6327    645   1306    152       C  
ATOM   1176  C   ALA D  15       8.788 106.098 110.797  1.00 59.58           C  
ANISOU 1176  C   ALA D  15     8266   7993   6378    532   1211     58       C  
ATOM   1177  O   ALA D  15       9.027 105.478 109.762  1.00 56.27           O  
ANISOU 1177  O   ALA D  15     7895   7424   6061    838   1139    251       O  
ATOM   1178  CB  ALA D  15       9.597 104.839 112.777  1.00 78.94           C  
ANISOU 1178  CB  ALA D  15    10399  11454   8142    678   1221    445       C  
ATOM   1179  H   ALA D  15       7.598 103.952 110.924  1.00 69.10           H  
ATOM   1180  HA  ALA D  15       7.890 105.969 112.647  1.00 72.41           H  
ATOM   1181  HB1 ALA D  15      10.167 105.593 112.994  1.00 94.73           H  
ATOM   1182  HB2 ALA D  15       9.329 104.382 113.590  1.00 94.73           H  
ATOM   1183  HB3 ALA D  15      10.068 104.225 112.192  1.00 94.73           H  
ATOM   1184  N   ILE D  16       8.932 107.421 110.893  1.00 51.91           N  
ANISOU 1184  N   ILE D  16     7288   7054   5382     65   1258   -243       N  
ATOM   1185  CA  ILE D  16       9.426 108.201 109.766  1.00 56.70           C  
ANISOU 1185  CA  ILE D  16     7863   7584   6098    -71   1165   -332       C  
ATOM   1186  C   ILE D  16      10.917 107.989 109.659  1.00 63.80           C  
ANISOU 1186  C   ILE D  16     8478   9217   6545    -34   1025   -124       C  
ATOM   1187  O   ILE D  16      11.636 108.159 110.629  1.00 59.54           O  
ANISOU 1187  O   ILE D  16     7737   9322   5562   -295    996    -78       O  
ATOM   1188  CB  ILE D  16       9.141 109.698 109.946  1.00 63.34           C  
ANISOU 1188  CB  ILE D  16     8790   8209   7068   -580   1331   -700       C  
ATOM   1189  CG1 ILE D  16       7.641 110.024 109.973  1.00 72.58           C  
ANISOU 1189  CG1 ILE D  16    10162   8580   8835   -583   1563   -789       C  
ATOM   1190  CG2 ILE D  16       9.824 110.468 108.784  1.00 57.66           C  
ANISOU 1190  CG2 ILE D  16     7993   7511   6404   -712   1205   -762       C  
ATOM   1191  CD1 ILE D  16       6.929 109.684 108.665  1.00 91.68           C  
ANISOU 1191  CD1 ILE D  16    12618  10444  11770   -319   1389   -559       C  
ATOM   1192  H   ILE D  16       8.751 107.884 111.594  1.00 62.30           H  
ATOM   1193  HA  ILE D  16       9.006 107.898 108.946  1.00 68.04           H  
ATOM   1194  HB  ILE D  16       9.535 109.988 110.783  1.00 76.01           H  
ATOM   1195 HG12 ILE D  16       7.221 109.515 110.684  1.00 87.10           H  
ATOM   1196 HG13 ILE D  16       7.528 110.974 110.137  1.00 87.10           H  
ATOM   1197 HG21 ILE D  16       9.650 111.417 108.889  1.00 69.19           H  
ATOM   1198 HG22 ILE D  16      10.779 110.302 108.815  1.00 69.19           H  
ATOM   1199 HG23 ILE D  16       9.461 110.156 107.941  1.00 69.19           H  
ATOM   1200 HD11 ILE D  16       5.990 109.914 108.748  1.00110.01           H  
ATOM   1201 HD12 ILE D  16       7.332 110.194 107.945  1.00110.01           H  
ATOM   1202 HD13 ILE D  16       7.024 108.735 108.492  1.00110.01           H  
ATOM   1203  N   ILE D  17      11.400 107.655 108.485  1.00 54.61           N  
ANISOU 1203  N   ILE D  17     7300   7968   5483    233    954     44       N  
ATOM   1204  CA  ILE D  17      12.830 107.650 108.292  1.00 51.98           C  
ANISOU 1204  CA  ILE D  17     6652   8276   4823    259    888    281       C  
ATOM   1205  C   ILE D  17      13.242 108.546 107.108  1.00 51.56           C  
ANISOU 1205  C   ILE D  17     6638   8056   4898     87    833    119       C  
ATOM   1206  O   ILE D  17      12.441 108.849 106.216  1.00 51.52           O  
ANISOU 1206  O   ILE D  17     6921   7403   5250     63    831    -72       O  
ATOM   1207  CB  ILE D  17      13.309 106.213 108.071  1.00 57.54           C  
ANISOU 1207  CB  ILE D  17     7268   9102   5491    835    994    753       C  
ATOM   1208  CG1 ILE D  17      12.642 105.656 106.801  1.00 56.50           C  
ANISOU 1208  CG1 ILE D  17     7570   8197   5699   1122   1098    713       C  
ATOM   1209  CG2 ILE D  17      12.973 105.326 109.240  1.00 67.41           C  
ANISOU 1209  CG2 ILE D  17     8436  10561   6616   1015   1043    957       C  
ATOM   1210  CD1 ILE D  17      13.278 104.371 106.321  1.00 60.82           C  
ANISOU 1210  CD1 ILE D  17     8158   8743   6207   1649   1355   1133       C  
ATOM   1211  H   ILE D  17      10.935 107.433 107.796  1.00 65.54           H  
ATOM   1212  HA  ILE D  17      13.260 107.991 109.092  1.00 62.38           H  
ATOM   1213  HB  ILE D  17      14.270 106.218 107.946  1.00 69.05           H  
ATOM   1214 HG12 ILE D  17      11.707 105.477 106.987  1.00 67.80           H  
ATOM   1215 HG13 ILE D  17      12.719 106.312 106.090  1.00 67.80           H  
ATOM   1216 HG21 ILE D  17      13.294 104.429 109.057  1.00 80.89           H  
ATOM   1217 HG22 ILE D  17      13.404 105.676 110.035  1.00 80.89           H  
ATOM   1218 HG23 ILE D  17      12.011 105.316 109.362  1.00 80.89           H  
ATOM   1219 HD11 ILE D  17      12.817 104.071 105.522  1.00 72.98           H  
ATOM   1220 HD12 ILE D  17      14.213 104.536 106.122  1.00 72.98           H  
ATOM   1221 HD13 ILE D  17      13.201 103.701 107.019  1.00 72.98           H  
HETATM 1222  N   SAR D  18      14.523 108.933 107.076  1.00 51.98           N  
ANISOU 1222  N   SAR D  18     6363   8729   4657    -47    765    271       N  
HETATM 1223  CA  SAR D  18      15.077 109.639 105.945  1.00 51.29           C  
ANISOU 1223  CA  SAR D  18     6278   8550   4661   -146    729    181       C  
HETATM 1224  C   SAR D  18      15.755 108.743 105.095  1.00 55.63           C  
ANISOU 1224  C   SAR D  18     6794   9093   5252    321    850    546       C  
HETATM 1225  O   SAR D  18      16.359 107.789 105.514  1.00 65.11           O  
ANISOU 1225  O   SAR D  18     7755  10668   6318    669    964    984       O  
HETATM 1226  CN  SAR D  18      15.494 108.739 108.154  1.00 58.59           C  
ANISOU 1226  CN  SAR D  18     6777  10431   5054   -168    687    597       C  
HETATM 1227  HN1 SAR D  18      15.743 109.613 108.532  1.00 70.31           H  
HETATM 1228  HN2 SAR D  18      16.297 108.296 107.797  1.00 70.31           H  
HETATM 1229  HN3 SAR D  18      15.098 108.182 108.853  1.00 70.31           H  
HETATM 1230  HA2 SAR D  18      14.561 110.317 105.486  1.00 61.55           H  
HETATM 1231  HA3 SAR D  18      15.799 110.089 106.447  1.00 61.55           H  
ATOM   1232  N   LEU D  19      15.719 109.007 103.799  1.00 48.10           N  
ANISOU 1232  N   LEU D  19     6098   7678   4500    347    887    420       N  
ATOM   1233  CA  LEU D  19      16.492 108.218 102.815  1.00 49.39           C  
ANISOU 1233  CA  LEU D  19     6336   7749   4681    757   1126    745       C  
ATOM   1234  C   LEU D  19      17.356 109.112 101.970  1.00 49.91           C  
ANISOU 1234  C   LEU D  19     6287   7953   4724    567   1093    687       C  
ATOM   1235  O   LEU D  19      16.831 109.911 101.191  1.00 51.19           O  
ANISOU 1235  O   LEU D  19     6725   7689   5037    269    966    336       O  
ATOM   1236  CB  LEU D  19      15.559 107.425 101.898  1.00 50.50           C  
ANISOU 1236  CB  LEU D  19     7085   7080   5021    944   1270    670       C  
ATOM   1237  CG  LEU D  19      14.701 106.412 102.680  1.00 64.28           C  
ANISOU 1237  CG  LEU D  19     8969   8654   6799   1170   1330    763       C  
ATOM   1238  CD1 LEU D  19      13.590 105.979 101.809  1.00 78.25           C  
ANISOU 1238  CD1 LEU D  19    11348   9645   8740   1107   1332    620       C  
ATOM   1239  CD2 LEU D  19      15.572 105.253 103.070  1.00 69.76           C  
ANISOU 1239  CD2 LEU D  19     9458   9675   7370   1682   1669   1247       C  
ATOM   1240  H   LEU D  19      15.255 109.641 103.449  1.00 57.72           H  
ATOM   1241  HA  LEU D  19      17.066 107.592 103.284  1.00 59.26           H  
ATOM   1242  HB2 LEU D  19      14.962 108.039 101.444  1.00 60.60           H  
ATOM   1243  HB3 LEU D  19      16.091 106.935 101.251  1.00 60.60           H  
ATOM   1244  HG  LEU D  19      14.340 106.825 103.480  1.00 77.13           H  
ATOM   1245 HD11 LEU D  19      13.042 105.340 102.292  1.00 93.90           H  
ATOM   1246 HD12 LEU D  19      13.059 106.754 101.567  1.00 93.90           H  
ATOM   1247 HD13 LEU D  19      13.956 105.566 101.012  1.00 93.90           H  
ATOM   1248 HD21 LEU D  19      15.039 104.610 103.563  1.00 83.71           H  
ATOM   1249 HD22 LEU D  19      15.928 104.841 102.266  1.00 83.71           H  
ATOM   1250 HD23 LEU D  19      16.298 105.576 103.625  1.00 83.71           H  
ATOM   1251  N   MET D  20      18.663 108.902 102.006  1.00 52.35           N  
ANISOU 1251  N   MET D  20     6185   8808   4896    774   1235   1106       N  
ATOM   1252  CA  MET D  20      19.618 109.846 101.449  1.00 53.46           C  
ANISOU 1252  CA  MET D  20     6083   9249   4980    551   1168   1102       C  
ATOM   1253  C   MET D  20      20.169 109.353 100.126  1.00 54.32           C  
ANISOU 1253  C   MET D  20     6446   8963   5229    906   1530   1290       C  
ATOM   1254  O   MET D  20      20.589 108.200 100.015  1.00 63.77           O  
ANISOU 1254  O   MET D  20     7661  10087   6482   1417   1938   1731       O  
ATOM   1255  CB  MET D  20      20.753 110.088 102.446  1.00 67.99           C  
ANISOU 1255  CB  MET D  20     7220  12054   6558    425   1039   1520       C  
ATOM   1256  CG  MET D  20      21.786 111.078 101.940  1.00 81.29           C  
ANISOU 1256  CG  MET D  20     8606  14116   8164    149    941   1562       C  
ATOM   1257  SD  MET D  20      23.051 111.587 103.131  1.00 98.37           S  
ANISOU 1257  SD  MET D  20     9948  17496   9931   -266    647   2063       S  
ATOM   1258  CE  MET D  20      22.097 112.596 104.223  1.00 79.56           C  
ANISOU 1258  CE  MET D  20     7806  15177   7244  -1038    301   1411       C  
ATOM   1259  H   MET D  20      19.029 108.206 102.354  1.00 62.81           H  
ATOM   1260  HA  MET D  20      19.168 110.693 101.303  1.00 64.15           H  
ATOM   1261  HB2 MET D  20      20.380 110.440 103.269  1.00 81.58           H  
ATOM   1262  HB3 MET D  20      21.205 109.248 102.620  1.00 81.58           H  
ATOM   1263  HG2 MET D  20      22.245 110.680 101.184  1.00 97.55           H  
ATOM   1264  HG3 MET D  20      21.323 111.880 101.650  1.00 97.55           H  
ATOM   1265  HE1 MET D  20      22.676 112.938 104.923  1.00 95.47           H  
ATOM   1266  HE2 MET D  20      21.716 113.333 103.720  1.00 95.47           H  
ATOM   1267  HE3 MET D  20      21.390 112.059 104.611  1.00 95.47           H  
ATOM   1268  N   VAL D  21      20.124 110.227  99.129  1.00 53.49           N  
ANISOU 1268  N   VAL D  21     6586   8550   5187    620   1437    955       N  
ATOM   1269  CA  VAL D  21      20.720 110.039  97.808  1.00 61.78           C  
ANISOU 1269  CA  VAL D  21     7922   9240   6311    809   1765   1056       C  
ATOM   1270  C   VAL D  21      21.605 111.228  97.565  1.00 55.25           C  
ANISOU 1270  C   VAL D  21     6707   8852   5435    518   1588   1011       C  
ATOM   1271  O   VAL D  21      21.107 112.274  97.107  1.00 57.76           O  
ANISOU 1271  O   VAL D  21     7212   8946   5790     80   1308    562       O  
ATOM   1272  CB  VAL D  21      19.658 109.978  96.723  1.00 67.53           C  
ANISOU 1272  CB  VAL D  21     9414   9119   7124    622   1758    677       C  
ATOM   1273  CG1 VAL D  21      20.343 109.646  95.353  1.00 62.16           C  
ANISOU 1273  CG1 VAL D  21     9155   8031   6433    780   2194    794       C  
ATOM   1274  CG2 VAL D  21      18.523 108.993  97.149  1.00 75.91           C  
ANISOU 1274  CG2 VAL D  21    10843   9786   8214    744   1783    652       C  
ATOM   1275  H   VAL D  21      19.728 110.987  99.200  1.00 64.18           H  
ATOM   1276  HA  VAL D  21      21.252 109.229  97.786  1.00 74.13           H  
ATOM   1277  HB  VAL D  21      19.258 110.857  96.639  1.00 81.03           H  
ATOM   1278 HG11 VAL D  21      19.663 109.607  94.662  1.00 74.59           H  
ATOM   1279 HG12 VAL D  21      20.987 110.341  95.145  1.00 74.59           H  
ATOM   1280 HG13 VAL D  21      20.792 108.789  95.424  1.00 74.59           H  
ATOM   1281 HG21 VAL D  21      17.852 108.963  96.448  1.00 91.09           H  
ATOM   1282 HG22 VAL D  21      18.904 108.110  97.281  1.00 91.09           H  
ATOM   1283 HG23 VAL D  21      18.125 109.308  97.975  1.00 91.09           H  
TER
HETATM 1284  N   ORN E   1       0.011 116.360  88.216  1.00 73.57           N  
ANISOU 1284  N   ORN E   1     9610  10043   8300   1987  -1853   -893       N  
HETATM 1285  CA  ORN E   1       1.306 115.766  88.498  1.00 71.69           C  
ANISOU 1285  CA  ORN E   1     9185  10149   7905   1378  -1248   -813       C  
HETATM 1286  C   ORN E   1       1.380 115.504  89.996  1.00 70.35           C  
ANISOU 1286  C   ORN E   1     8596  10080   8055   1686   -929  -1193       C  
HETATM 1287  O   ORN E   1       0.495 115.877  90.775  1.00 82.96           O  
ANISOU 1287  O   ORN E   1    10092  11495   9934   2275  -1134  -1524       O  
HETATM 1288  CB  ORN E   1       2.467 116.732  88.106  1.00 65.62           C  
ANISOU 1288  CB  ORN E   1     9127   8964   6841    707  -1430   -422       C  
HETATM 1289  CG  ORN E   1       2.810 116.777  86.612  1.00 77.26           C  
ANISOU 1289  CG  ORN E   1    11019  10505   7832     29  -1548    -24       C  
HETATM 1290  CD  ORN E   1       3.542 115.520  86.082  1.00 58.27           C  
ANISOU 1290  CD  ORN E   1     8071   8833   5237   -544   -865    -95       C  
HETATM 1291  NE  ORN E   1       4.834 115.387  86.637  1.00 56.09           N  
ANISOU 1291  NE  ORN E   1     7640   8683   4988  -1013   -431   -197       N  
HETATM 1292  HA  ORN E   1       1.338 114.806  87.975  1.00 86.03           H  
HETATM 1293  HB2 ORN E   1       3.377 116.419  88.638  1.00 78.74           H  
HETATM 1294  HB3 ORN E   1       2.183 117.749  88.413  1.00 78.74           H  
HETATM 1295  HG2 ORN E   1       1.881 116.909  86.045  1.00 92.71           H  
HETATM 1296  HG3 ORN E   1       3.452 117.647  86.432  1.00 92.71           H  
HETATM 1297  HD2 ORN E   1       2.953 114.635  86.339  1.00 69.93           H  
HETATM 1298  HD3 ORN E   1       3.643 115.611  84.996  1.00 69.93           H  
HETATM 1299  HE1 ORN E   1       5.578 115.915  86.185  1.00 67.31           H  
HETATM 1300  H1  ORN E   1      -0.765 115.877  88.677  1.00 88.28           H  
HETATM 1301  H2  ORN E   1      -0.061 117.335  88.516  1.00 88.28           H  
HETATM 1302  H3  ORN E   1      -0.225 116.364  87.221  1.00 88.28           H  
ATOM   1303  N   LEU E   2       2.491 114.815  90.390  1.00 64.89           N  
ANISOU 1303  N   LEU E   2     7637   9701   7316   1222   -426  -1186       N  
ATOM   1304  CA  LEU E   2       2.759 114.475  91.775  1.00 58.85           C  
ANISOU 1304  CA  LEU E   2     6546   9037   6779   1348   -143  -1467       C  
ATOM   1305  C   LEU E   2       3.878 115.374  92.247  1.00 63.57           C  
ANISOU 1305  C   LEU E   2     7574   9233   7345    996   -216  -1320       C  
ATOM   1306  O   LEU E   2       4.789 115.653  91.458  1.00 58.31           O  
ANISOU 1306  O   LEU E   2     7212   8489   6456    446   -214  -1040       O  
ATOM   1307  CB  LEU E   2       3.192 113.010  91.905  1.00 69.42           C  
ANISOU 1307  CB  LEU E   2     7279  10943   8153   1112    349  -1575       C  
ATOM   1308  CG  LEU E   2       2.153 111.942  91.496  1.00 68.36           C  
ANISOU 1308  CG  LEU E   2     6863  11042   8067   1253    399  -1582       C  
ATOM   1309  CD1 LEU E   2       2.722 110.530  91.598  1.00 60.10           C  
ANISOU 1309  CD1 LEU E   2     5870   9814   7152    745    524  -1315       C  
ATOM   1310  CD2 LEU E   2       0.903 112.073  92.290  1.00 61.01           C  
ANISOU 1310  CD2 LEU E   2     6034   9871   7275   1563    213  -1691       C  
ATOM   1311  H   LEU E   2       3.109 114.559  89.850  1.00 77.87           H  
ATOM   1312  HA  LEU E   2       1.971 114.629  92.319  1.00 70.62           H  
ATOM   1313  HB2 LEU E   2       3.976 112.875  91.350  1.00 83.30           H  
ATOM   1314  HB3 LEU E   2       3.424 112.844  92.832  1.00 83.30           H  
ATOM   1315  HG  LEU E   2       1.919 112.090  90.566  1.00 82.03           H  
ATOM   1316 HD11 LEU E   2       2.038 109.895  91.333  1.00 72.12           H  
ATOM   1317 HD12 LEU E   2       3.489 110.455  91.010  1.00 72.12           H  
ATOM   1318 HD13 LEU E   2       2.990 110.364  92.516  1.00 72.12           H  
ATOM   1319 HD21 LEU E   2       0.276 111.388  92.007  1.00 73.21           H  
ATOM   1320 HD22 LEU E   2       1.113 111.960  93.231  1.00 73.21           H  
ATOM   1321 HD23 LEU E   2       0.523 112.952  92.139  1.00 73.21           H  
ATOM   1322  N   VAL E   3       3.830 115.858  93.475  1.00 57.54           N  
ANISOU 1322  N   VAL E   3     9326   5265   7272   1802   -617    -41       N  
ATOM   1323  CA  VAL E   3       4.926 116.698  93.966  1.00 67.44           C  
ANISOU 1323  CA  VAL E   3    11082   6216   8326   1277   -513   -212       C  
ATOM   1324  C   VAL E   3       5.525 115.949  95.144  1.00 59.19           C  
ANISOU 1324  C   VAL E   3     9100   6052   7338   1109      1   -338       C  
ATOM   1325  O   VAL E   3       4.856 115.816  96.158  1.00 52.38           O  
ANISOU 1325  O   VAL E   3     7653   5663   6585   1671     17   -610       O  
ATOM   1326  CB  VAL E   3       4.491 118.064  94.397  1.00 67.15           C  
ANISOU 1326  CB  VAL E   3    11700   5507   8307   1749   -997   -584       C  
ATOM   1327  CG1 VAL E   3       5.716 118.866  94.822  1.00 69.95           C  
ANISOU 1327  CG1 VAL E   3    12594   5568   8417   1101   -841   -721       C  
ATOM   1328  CG2 VAL E   3       3.753 118.762  93.277  1.00 85.55           C  
ANISOU 1328  CG2 VAL E   3    14815   7040  10651   1949  -1642   -426       C  
ATOM   1329  HA  VAL E   3       5.603 116.790  93.278  1.00 80.93           H  
ATOM   1330  HB  VAL E   3       3.894 117.988  95.158  1.00 80.58           H  
ATOM   1331 HG11 VAL E   3       5.433 119.751  95.101  1.00 83.94           H  
ATOM   1332 HG12 VAL E   3       6.152 118.410  95.559  1.00 83.94           H  
ATOM   1333 HG13 VAL E   3       6.325 118.935  94.070  1.00 83.94           H  
ATOM   1334 HG21 VAL E   3       3.482 119.643  93.580  1.00102.66           H  
ATOM   1335 HG22 VAL E   3       4.344 118.843  92.512  1.00102.66           H  
ATOM   1336 HG23 VAL E   3       2.972 118.239  93.039  1.00102.66           H  
ATOM   1337  H   VAL E   3       3.230 115.684  94.066  1.00 69.05           H  
ATOM   1338  N   PHE E   4       6.762 115.476  95.026  1.00 49.42           N  
ANISOU 1338  N   PHE E   4     7723   5018   6036    309    383   -184       N  
ATOM   1339  CA  PHE E   4       7.469 114.816  96.130  1.00 50.46           C  
ANISOU 1339  CA  PHE E   4     7052   5862   6257     76    735   -272       C  
ATOM   1340  C   PHE E   4       8.309 115.855  96.822  1.00 56.20           C  
ANISOU 1340  C   PHE E   4     8264   6287   6803   -243    734   -560       C  
ATOM   1341  O   PHE E   4       8.598 116.928  96.278  1.00 53.35           O  
ANISOU 1341  O   PHE E   4     8844   5176   6252   -478    554   -637       O  
ATOM   1342  CB  PHE E   4       8.395 113.678  95.648  1.00 49.75           C  
ANISOU 1342  CB  PHE E   4     6418   6132   6352   -589   1087    -31       C  
ATOM   1343  CG  PHE E   4       7.672 112.526  95.109  1.00 47.80           C  
ANISOU 1343  CG  PHE E   4     5567   6280   6314   -324   1141    237       C  
ATOM   1344  CD2 PHE E   4       7.244 111.473  95.938  1.00 51.30           C  
ANISOU 1344  CD2 PHE E   4     5191   7398   6904    -22   1111    226       C  
ATOM   1345  CD1 PHE E   4       7.302 112.491  93.781  1.00 54.51           C  
ANISOU 1345  CD1 PHE E   4     6839   6753   7120   -404   1073    433       C  
ATOM   1346  CE2 PHE E   4       6.525 110.441  95.432  1.00 56.79           C  
ANISOU 1346  CE2 PHE E   4     5943   8010   7626     91    818    165       C  
ATOM   1347  CE1 PHE E   4       6.558 111.424  93.299  1.00 48.13           C  
ANISOU 1347  CE1 PHE E   4     5453   6331   6502   -121   1122    667       C  
ATOM   1348  CZ  PHE E   4       6.175 110.429  94.130  1.00 47.37           C  
ANISOU 1348  CZ  PHE E   4     4874   6692   6433    127    866    422       C  
ATOM   1349  H   PHE E   4       7.225 115.524  94.303  1.00 59.30           H  
ATOM   1350  HA  PHE E   4       6.829 114.455  96.763  1.00 60.55           H  
ATOM   1351  HB2 PHE E   4       8.973 114.020  94.948  1.00 59.70           H  
ATOM   1352  HB3 PHE E   4       8.930 113.370  96.396  1.00 59.70           H  
ATOM   1353  HD2 PHE E   4       7.465 111.480  96.842  1.00 61.56           H  
ATOM   1354  HD1 PHE E   4       7.549 113.183  93.210  1.00 65.41           H  
ATOM   1355  HE2 PHE E   4       6.259 109.745  95.988  1.00 68.15           H  
ATOM   1356  HE1 PHE E   4       6.321 111.394  92.401  1.00 57.75           H  
ATOM   1357  HZ  PHE E   4       5.696 109.708  93.791  1.00 56.85           H  
ATOM   1358  N   PHE E   5       8.707 115.550  98.038  1.00 49.06           N  
ANISOU 1358  N   PHE E   5     6767   5947   5927   -301    902   -706       N  
ATOM   1359  CA  PHE E   5       9.443 116.535  98.821  1.00 49.35           C  
ANISOU 1359  CA  PHE E   5     7211   5760   5780   -566    901  -1011       C  
ATOM   1360  C   PHE E   5      10.780 115.974  99.271  1.00 49.01           C  
ANISOU 1360  C   PHE E   5     6718   6079   5825  -1270   1159   -973       C  
ATOM   1361  O   PHE E   5      10.878 114.800  99.641  1.00 53.34           O  
ANISOU 1361  O   PHE E   5     6423   7254   6591  -1322   1257   -792       O  
ATOM   1362  CB  PHE E   5       8.639 116.980 100.041  1.00 59.96           C  
ANISOU 1362  CB  PHE E   5     8374   7378   7028     15    790  -1356       C  
ATOM   1363  CG  PHE E   5       7.431 117.741  99.672  1.00 63.29           C  
ANISOU 1363  CG  PHE E   5     9246   7323   7478    716    474  -1562       C  
ATOM   1364  CD1 PHE E   5       7.502 119.101  99.419  1.00 79.07           C  
ANISOU 1364  CD1 PHE E   5    12171   8481   9392    766    195  -1804       C  
ATOM   1365  CD2 PHE E   5       6.242 117.090  99.487  1.00 65.50           C  
ANISOU 1365  CD2 PHE E   5     9045   7922   7919   1310    398  -1514       C  
ATOM   1366  CE1 PHE E   5       6.383 119.808  99.043  1.00 86.59           C  
ANISOU 1366  CE1 PHE E   5    13530   8882  10488   1455   -230  -2015       C  
ATOM   1367  CE2 PHE E   5       5.124 117.788  99.117  1.00 69.83           C  
ANISOU 1367  CE2 PHE E   5     9951   7983   8599   1993     32  -1762       C  
ATOM   1368  CZ  PHE E   5       5.200 119.155  98.882  1.00 77.00           C  
ANISOU 1368  CZ  PHE E   5    11769   7998   9491   2083   -324  -2011       C  
ATOM   1369  H   PHE E   5       8.572 114.798  98.432  1.00 58.87           H  
ATOM   1370  HA  PHE E   5       9.613 117.316  98.271  1.00 59.22           H  
ATOM   1371  HB2 PHE E   5       8.360 116.196 100.540  1.00 71.95           H  
ATOM   1372  HB3 PHE E   5       9.195 117.548 100.597  1.00 71.95           H  
ATOM   1373  HD1 PHE E   5       8.311 119.546  99.528  1.00 94.89           H  
ATOM   1374  HD2 PHE E   5       6.186 116.175  99.642  1.00 78.59           H  
ATOM   1375  HE1 PHE E   5       6.437 120.724  98.890  1.00103.91           H  
ATOM   1376  HE2 PHE E   5       4.315 117.343  99.007  1.00 83.80           H  
ATOM   1377  HZ  PHE E   5       4.438 119.626  98.632  1.00 92.40           H  
ATOM   1378  N   ALA E   6      11.789 116.831  99.304  1.00 53.28           N  
ANISOU 1378  N   ALA E   6     7813   6204   6229  -1798   1214  -1171       N  
ATOM   1379  CA  ALA E   6      13.080 116.406  99.798  1.00 49.05           C  
ANISOU 1379  CA  ALA E   6     6831   5968   5838  -2440   1402  -1232       C  
ATOM   1380  C   ALA E   6      13.792 117.529 100.467  1.00 57.80           C  
ANISOU 1380  C   ALA E   6     8466   6788   6708  -2731   1395  -1556       C  
ATOM   1381  O   ALA E   6      13.666 118.702 100.093  1.00 59.28           O  
ANISOU 1381  O   ALA E   6     9555   6332   6638  -2715   1307  -1716       O  
ATOM   1382  CB  ALA E   6      13.986 115.880  98.670  1.00 50.04           C  
ANISOU 1382  CB  ALA E   6     6865   6012   6136  -2781   1500  -1086       C  
ATOM   1383  H   ALA E   6      11.751 117.652  99.049  1.00 63.94           H  
ATOM   1384  HA  ALA E   6      12.957 115.695 100.446  1.00 58.86           H  
ATOM   1385  HB1 ALA E   6      14.836 115.608  99.050  1.00 60.05           H  
ATOM   1386  HB2 ALA E   6      13.555 115.121  98.248  1.00 60.05           H  
ATOM   1387  HB3 ALA E   6      14.124 116.587  98.021  1.00 60.05           H  
ATOM   1388  N   GLU E   7      14.664 117.128 101.372  1.00 48.05           N  
ANISOU 1388  N   GLU E   7     6685   5977   5597  -3086   1450  -1637       N  
ATOM   1389  CA  GLU E   7      15.612 118.039 101.969  1.00 51.25           C  
ANISOU 1389  CA  GLU E   7     7454   6198   5820  -3417   1471  -1893       C  
ATOM   1390  C   GLU E   7      16.871 118.050 101.097  1.00 82.38           C  
ANISOU 1390  C   GLU E   7    11417  10046   9838  -3497   1547  -1723       C  
ATOM   1391  O   GLU E   7      17.505 116.996 100.872  1.00 58.07           O  
ANISOU 1391  O   GLU E   7     7739   7267   7056  -3307   1459  -1553       O  
ATOM   1392  CB  GLU E   7      15.910 117.579 103.393  1.00 73.21           C  
ANISOU 1392  CB  GLU E   7     9604   9578   8636  -3479   1368  -1944       C  
ATOM   1393  CG  GLU E   7      16.564 118.609 104.187  1.00 72.93           C  
ANISOU 1393  CG  GLU E   7     9972   9393   8345  -3701   1368  -2224       C  
ATOM   1394  CD  GLU E   7      16.774 118.222 105.648  1.00104.18           C  
ANISOU 1394  CD  GLU E   7    13407  13943  12232  -3806   1215  -2259       C  
ATOM   1395  OE1 GLU E   7      16.538 117.039 106.009  1.00 83.22           O  
ANISOU 1395  OE1 GLU E   7    10072  11796   9752  -3612   1051  -1933       O  
ATOM   1396  OE2 GLU E   7      17.173 119.124 106.436  1.00 90.28           O1-
ANISOU 1396  OE2 GLU E   7    11992  12107  10205  -3979   1219  -2528       O1-
ATOM   1397  H   GLU E   7      14.726 116.320 101.660  1.00 57.66           H  
ATOM   1398  HA  GLU E   7      15.240 118.934 101.997  1.00 61.50           H  
ATOM   1399  HB2 GLU E   7      15.077 117.346 103.831  1.00 87.86           H  
ATOM   1400  HB3 GLU E   7      16.497 116.807 103.360  1.00 87.86           H  
ATOM   1401  HG2 GLU E   7      17.435 118.794 103.802  1.00 87.51           H  
ATOM   1402  HG3 GLU E   7      16.019 119.411 104.168  1.00 87.51           H  
ATOM   1403  N   ASP E   8      17.177 119.219 100.538  1.00 61.49           N  
ANISOU 1403  N   ASP E   8     8552   9583   5228   -795   3375  -1715       N  
ATOM   1404  CA  ASP E   8      18.264 119.385  99.553  1.00 63.74           C  
ANISOU 1404  CA  ASP E   8     8372   9705   6142   -743   3705  -1232       C  
ATOM   1405  C   ASP E   8      19.406 120.029 100.307  1.00 78.81           C  
ANISOU 1405  C   ASP E   8     9714  11931   8300  -1467   3230  -1205       C  
ATOM   1406  O   ASP E   8      19.306 121.183 100.724  1.00 93.16           O  
ANISOU 1406  O   ASP E   8    11702  13564  10131  -2005   3056  -1735       O  
ATOM   1407  CB  ASP E   8      17.861 120.252  98.363  1.00 61.14           C  
ANISOU 1407  CB  ASP E   8     8414   8610   6207   -470   4059  -1360       C  
ATOM   1408  CG  ASP E   8      18.936 120.392  97.339  1.00 63.67           C  
ANISOU 1408  CG  ASP E   8     8321   8720   7151   -355   4545   -843       C  
ATOM   1409  OD1 ASP E   8      19.981 119.706  97.443  1.00 96.30           O  
ANISOU 1409  OD1 ASP E   8    11797  13267  11525   -385   4458   -266       O  
ATOM   1410  OD2 ASP E   8      18.739 121.178  96.374  1.00 77.50           O1-
ANISOU 1410  OD2 ASP E   8    10355   9853   9237   -160   4645   -885       O1-
ATOM   1411  H   ASP E   8      16.764 119.952 100.714  1.00 73.78           H  
ATOM   1412  HA  ASP E   8      18.550 118.517  99.228  1.00 76.49           H  
ATOM   1413  HB2 ASP E   8      17.089 119.853  97.932  1.00 73.37           H  
ATOM   1414  HB3 ASP E   8      17.638 121.140  98.684  1.00 73.37           H  
ATOM   1415  N   CYS E   9      20.426 119.261 100.557  1.00 75.11           N  
ANISOU 1415  N   CYS E   9     8589  11954   7996  -1472   2976   -647       N  
ATOM   1416  CA  CYS E   9      21.440 119.646 101.499  1.00 82.95           C  
ANISOU 1416  CA  CYS E   9     9016  13380   9123  -2109   2383   -676       C  
ATOM   1417  C   CYS E   9      22.639 119.982 100.648  1.00 86.91           C  
ANISOU 1417  C   CYS E   9     8895  13661  10467  -2201   2626   -216       C  
ATOM   1418  O   CYS E   9      23.362 119.079 100.229  1.00 87.03           O  
ANISOU 1418  O   CYS E   9     8427  13907  10733  -1865   2725    439       O  
ATOM   1419  CB  CYS E   9      21.692 118.528 102.498  1.00 84.42           C  
ANISOU 1419  CB  CYS E   9     8930  14308   8839  -2026   1884   -419       C  
ATOM   1420  SG  CYS E   9      20.284 118.437 103.693  1.00 99.06           S  
ANISOU 1420  SG  CYS E   9    11552  16367   9719  -2056   1603  -1067       S  
ATOM   1421  H   CYS E   9      20.560 118.496 100.189  1.00 90.13           H  
ATOM   1422  HA  CYS E   9      21.162 120.441 101.980  1.00 99.54           H  
ATOM   1423  HB2 CYS E   9      21.756 117.681 102.029  1.00101.31           H  
ATOM   1424  HB3 CYS E   9      22.507 118.709 102.991  1.00101.31           H  
ATOM   1425  N   GLY E  10      22.772 121.287 100.342  1.00102.43           N  
ANISOU 1425  N   GLY E  10    10920  15126  12873  -2619   2789   -563       N  
ATOM   1426  CA  GLY E  10      23.810 121.846  99.499  1.00 96.31           C  
ANISOU 1426  CA  GLY E  10     9628  13991  12973  -2758   3133   -207       C  
ATOM   1427  C   GLY E  10      25.002 122.125 100.370  1.00103.05           C  
ANISOU 1427  C   GLY E  10     9688  15263  14204  -3407   2517   -212       C  
ATOM   1428  O   GLY E  10      25.311 121.332 101.261  1.00104.85           O  
ANISOU 1428  O   GLY E  10     9604  16160  14074  -3438   1946   -104       O  
ATOM   1429  H   GLY E  10      22.233 121.888 100.637  1.00122.92           H  
ATOM   1430  HA2 GLY E  10      24.058 121.215  98.804  1.00115.57           H  
ATOM   1431  HA3 GLY E  10      23.507 122.672  99.091  1.00115.57           H  
ATOM   1432  N   SER E  11      25.653 123.263 100.169  1.00109.02           N  
ANISOU 1432  N   SER E  11    10120  15623  15680  -3920   2604   -378       N  
ATOM   1433  CA  SER E  11      26.835 123.578 100.967  1.00128.31           C  
ANISOU 1433  CA  SER E  11    11730  18421  18602  -4548   1990   -444       C  
ATOM   1434  C   SER E  11      26.558 124.653 102.010  1.00131.68           C  
ANISOU 1434  C   SER E  11    12324  18848  18859  -5221   1424  -1281       C  
ATOM   1435  O   SER E  11      26.896 124.475 103.186  1.00127.52           O  
ANISOU 1435  O   SER E  11    11488  18919  18043  -5534    629  -1544       O  
ATOM   1436  CB  SER E  11      28.019 123.991 100.066  1.00123.86           C  
ANISOU 1436  CB  SER E  11    10453  17459  19149  -4685   2439     25       C  
ATOM   1437  OG  SER E  11      27.784 125.223  99.414  1.00124.43           O  
ANISOU 1437  OG  SER E  11    10823  16753  19702  -4908   2974   -247       O  
ATOM   1438  H   SER E  11      25.439 123.861  99.588  1.00130.82           H  
ATOM   1439  HA  SER E  11      27.101 122.776 101.444  1.00153.98           H  
ATOM   1440  HB2 SER E  11      28.815 124.075 100.615  1.00148.63           H  
ATOM   1441  HB3 SER E  11      28.155 123.304  99.395  1.00148.63           H  
ATOM   1442  HG  SER E  11      27.668 125.831  99.982  1.00149.32           H  
ATOM   1443  N   ASN E  12      25.925 125.760 101.621  1.00132.84           N  
ANISOU 1443  N   ASN E  12    12992  18347  19136  -5411   1799  -1723       N  
ATOM   1444  CA  ASN E  12      25.575 126.805 102.576  1.00125.42           C  
ANISOU 1444  CA  ASN E  12    12278  17370  18005  -6021   1284  -2547       C  
ATOM   1445  C   ASN E  12      24.269 126.514 103.318  1.00119.98           C  
ANISOU 1445  C   ASN E  12    12413  16961  16215  -5824   1005  -3009       C  
ATOM   1446  O   ASN E  12      23.882 127.310 104.175  1.00125.08           O  
ANISOU 1446  O   ASN E  12    13322  17627  16576  -6271    554  -3706       O  
ATOM   1447  CB  ASN E  12      25.467 128.169 101.869  1.00127.10           C  
ANISOU 1447  CB  ASN E  12    12701  16739  18854  -6331   1815  -2838       C  
ATOM   1448  CG  ASN E  12      26.734 128.546 101.081  1.00140.90           C  
ANISOU 1448  CG  ASN E  12    13651  18103  21781  -6532   2216  -2371       C  
ATOM   1449  ND2 ASN E  12      26.737 129.749 100.510  1.00135.95           N  
ANISOU 1449  ND2 ASN E  12    13154  16723  21778  -6825   2699  -2592       N  
ATOM   1450  OD1 ASN E  12      27.685 127.768 100.984  1.00150.32           O  
ANISOU 1450  OD1 ASN E  12    14131  19652  23331  -6413   2124  -1811       O  
ATOM   1451  H   ASN E  12      25.689 125.927 100.812  1.00159.41           H  
ATOM   1452  HA  ASN E  12      26.281 126.870 103.237  1.00150.50           H  
ATOM   1453  HB2 ASN E  12      24.725 128.142 101.245  1.00152.52           H  
ATOM   1454  HB3 ASN E  12      25.314 128.857 102.535  1.00152.52           H  
ATOM   1455 HD21 ASN E  12      27.421 130.009 100.058  1.00163.14           H  
ATOM   1456 HD22 ASN E  12      26.054 130.266 100.592  1.00163.14           H  
ATOM   1457  N   LYS E  13      23.580 125.410 103.036  1.00112.08           N  
ANISOU 1457  N   LYS E  13    11809  16160  14616  -5172   1261  -2661       N  
ATOM   1458  CA  LYS E  13      22.300 125.186 103.691  1.00106.89           C  
ANISOU 1458  CA  LYS E  13    11925  15682  13006  -4992   1088  -3108       C  
ATOM   1459  C   LYS E  13      21.499 124.005 103.151  1.00101.17           C  
ANISOU 1459  C   LYS E  13    11622  15017  11801  -4235   1518  -2712       C  
ATOM   1460  O   LYS E  13      21.480 123.760 101.935  1.00 94.23           O  
ANISOU 1460  O   LYS E  13    10788  13730  11283  -3787   2168  -2287       O  
ATOM   1461  CB  LYS E  13      21.420 126.434 103.569  1.00109.10           C  
ANISOU 1461  CB  LYS E  13    12863  15370  13221  -5250   1302  -3786       C  
ATOM   1462  CG  LYS E  13      21.372 127.011 102.172  1.00103.03           C  
ANISOU 1462  CG  LYS E  13    12255  13825  13067  -5053   2108  -3591       C  
ATOM   1463  CD  LYS E  13      20.006 127.608 101.871  1.00104.80           C  
ANISOU 1463  CD  LYS E  13    13410  13554  12856  -4873   2468  -4117       C  
ATOM   1464  CE  LYS E  13      19.823 127.845 100.367  1.00112.99           C  
ANISOU 1464  CE  LYS E  13    14718  13882  14330  -4404   3331  -3813       C  
ATOM   1465  NZ  LYS E  13      18.399 127.625  99.898  1.00111.36           N1+
ANISOU 1465  NZ  LYS E  13    15388  13399  13525  -3816   3712  -4068       N1+
ATOM   1466  H   LYS E  13      23.824 124.795 102.486  1.00134.49           H  
ATOM   1467  HA  LYS E  13      22.459 125.027 104.635  1.00128.27           H  
ATOM   1468  HB2 LYS E  13      20.513 126.203 103.826  1.00130.92           H  
ATOM   1469  HB3 LYS E  13      21.765 127.119 104.162  1.00130.92           H  
ATOM   1470  HG2 LYS E  13      22.037 127.713 102.092  1.00123.63           H  
ATOM   1471  HG3 LYS E  13      21.546 126.307 101.528  1.00123.63           H  
ATOM   1472  HD2 LYS E  13      19.315 126.996 102.169  1.00125.76           H  
ATOM   1473  HD3 LYS E  13      19.921 128.460 102.327  1.00125.76           H  
ATOM   1474  HE2 LYS E  13      20.067 128.761 100.162  1.00135.58           H  
ATOM   1475  HE3 LYS E  13      20.396 127.233  99.880  1.00135.58           H  
ATOM   1476  HZ1 LYS E  13      18.341 127.774  99.022  1.00133.63           H  
ATOM   1477  HZ2 LYS E  13      18.150 126.787 100.066  1.00133.63           H  
ATOM   1478  HZ3 LYS E  13      17.849 128.181 100.323  1.00133.63           H  
ATOM   1479  N   CYS E  14      20.817 123.292 104.059  1.00 95.97           N  
ANISOU 1479  N   CYS E  14    11288  14841  10337  -4068   1168  -2874       N  
ATOM   1480  CA  CYS E  14      19.751 122.400 103.626  1.00116.68           C  
ANISOU 1480  CA  CYS E  14    14458  17385  12491  -3414   1596  -2722       C  
ATOM   1481  C   CYS E  14      18.523 123.249 103.287  1.00 92.44           C  
ANISOU 1481  C   CYS E  14    12176  13728   9219  -3391   1951  -3328       C  
ATOM   1482  O   CYS E  14      18.483 124.462 103.504  1.00106.69           O  
ANISOU 1482  O   CYS E  14    14129  15251  11156  -3886   1828  -3849       O  
ATOM   1483  CB  CYS E  14      19.418 121.340 104.692  1.00110.72           C  
ANISOU 1483  CB  CYS E  14    13785  17286  10999  -3227   1189  -2661       C  
ATOM   1484  SG  CYS E  14      20.646 119.952 105.034  1.00101.64           S  
ANISOU 1484  SG  CYS E  14    11826  16878   9914  -3006    843  -1851       S  
ATOM   1485  H   CYS E  14      20.953 123.310 104.908  1.00115.17           H  
ATOM   1486  HA  CYS E  14      20.031 121.938 102.820  1.00140.02           H  
ATOM   1487  HB2 CYS E  14      19.282 121.803 105.534  1.00132.87           H  
ATOM   1488  HB3 CYS E  14      18.585 120.915 104.432  1.00132.87           H  
ATOM   1489  N   ALA E  15      17.513 122.610 102.768  1.00 78.59           N  
ANISOU 1489  N   ALA E  15    10918  11781   7160  -2808   2373  -3290       N  
ATOM   1490  CA  ALA E  15      16.298 123.301 102.377  1.00 81.80           C  
ANISOU 1490  CA  ALA E  15    11991  11583   7508  -2613   2625  -3702       C  
ATOM   1491  C   ALA E  15      15.336 122.309 101.753  1.00 81.07           C  
ANISOU 1491  C   ALA E  15    11981  11191   7632  -1640   2607  -3055       C  
ATOM   1492  O   ALA E  15      15.742 121.463 100.953  1.00 64.74           O  
ANISOU 1492  O   ALA E  15     9727   9159   5714  -1244   2919  -2650       O  
ATOM   1493  CB  ALA E  15      16.586 124.408 101.379  1.00 92.88           C  
ANISOU 1493  CB  ALA E  15    13488  12383   9417  -2785   3081  -3881       C  
ATOM   1494  H   ALA E  15      17.495 121.762 102.627  1.00 94.30           H  
ATOM   1495  HA  ALA E  15      15.878 123.691 103.159  1.00 98.17           H  
ATOM   1496  HB1 ALA E  15      15.753 124.845 101.143  1.00111.45           H  
ATOM   1497  HB2 ALA E  15      17.192 125.048 101.784  1.00111.45           H  
ATOM   1498  HB3 ALA E  15      16.993 124.021 100.588  1.00111.45           H  
ATOM   1499  N   ILE E  16      14.057 122.459 102.028  1.00 56.65           N  
ANISOU 1499  N   ILE E  16     9157   5379   6990  -1596   -202  -1599       N  
ATOM   1500  CA  ILE E  16      13.049 121.560 101.529  1.00 60.73           C  
ANISOU 1500  CA  ILE E  16     9334   6220   7521  -1267   -155  -1620       C  
ATOM   1501  C   ILE E  16      12.644 122.028 100.158  1.00 74.62           C  
ANISOU 1501  C   ILE E  16    11399   7834   9121  -1269   -296  -1399       C  
ATOM   1502  O   ILE E  16      12.225 123.174 100.004  1.00 74.08           O  
ANISOU 1502  O   ILE E  16    11840   7306   9003  -1116   -589  -1317       O  
ATOM   1503  H   ILE E  16      13.742 123.094 102.516  1.00 67.99           H  
ATOM   1504  HA  ILE E  16      13.410 120.662 101.462  1.00 72.88           H  
ATOM   1505  CB  ILE E  16      11.833 121.537 102.454  1.00 68.66           C  
ANISOU 1505  CB  ILE E  16    10233   7245   8609   -751   -215  -1863       C  
ATOM   1506  CG1 ILE E  16      12.186 120.806 103.751  1.00 71.98           C  
ANISOU 1506  CG1 ILE E  16    10350   7905   9093   -870    -74  -2043       C  
ATOM   1507  CG2 ILE E  16      10.697 120.879 101.720  1.00 64.34           C  
ANISOU 1507  CG2 ILE E  16     9431   6960   8054   -401   -207  -1884       C  
ATOM   1508  CD1 ILE E  16      11.122 120.899 104.744  1.00 88.70           C  
ANISOU 1508  CD1 ILE E  16    12413  10078  11209   -542    -77  -2343       C  
ATOM   1509  HB  ILE E  16      11.583 122.450 102.666  1.00 82.39           H  
ATOM   1510 HG12 ILE E  16      12.336 119.868 103.557  1.00 86.37           H  
ATOM   1511 HG13 ILE E  16      12.987 121.200 104.130  1.00 86.37           H  
ATOM   1512 HG21 ILE E  16       9.919 120.859 102.298  1.00 77.20           H  
ATOM   1513 HG22 ILE E  16      10.502 121.390 100.919  1.00 77.20           H  
ATOM   1514 HG23 ILE E  16      10.957 119.975 101.482  1.00 77.20           H  
ATOM   1515 HD11 ILE E  16      11.394 120.422 105.544  1.00106.43           H  
ATOM   1516 HD12 ILE E  16      10.966 121.833 104.952  1.00106.43           H  
ATOM   1517 HD13 ILE E  16      10.315 120.502 104.379  1.00106.43           H  
ATOM   1518  N   ILE E  17      12.696 121.128  99.182  1.00 53.26           N  
ANISOU 1518  N   ILE E  17     8393   5496   6348  -1431   -140  -1318       N  
ATOM   1519  CA  ILE E  17      12.305 121.473  97.834  1.00 63.97           C  
ANISOU 1519  CA  ILE E  17    10055   6763   7488  -1519   -282  -1086       C  
ATOM   1520  C   ILE E  17      11.208 120.539  97.355  1.00 62.34           C  
ANISOU 1520  C   ILE E  17     9462   6901   7322  -1124   -243  -1131       C  
ATOM   1521  O   ILE E  17      11.071 119.442  97.870  1.00 61.35           O  
ANISOU 1521  O   ILE E  17     8786   7167   7356   -969    -22  -1319       O  
ATOM   1522  CB  ILE E  17      13.529 121.409  96.932  1.00 63.59           C  
ANISOU 1522  CB  ILE E  17    10066   6859   7235  -2262    -91   -974       C  
ATOM   1523  CG1 ILE E  17      14.070 119.961  96.898  1.00 70.99           C  
ANISOU 1523  CG1 ILE E  17    10255   8374   8346  -2426    268  -1197       C  
ATOM   1524  CG2 ILE E  17      14.600 122.318  97.518  1.00 63.66           C  
ANISOU 1524  CG2 ILE E  17    10421   6548   7218  -2646   -109   -981       C  
ATOM   1525  CD1 ILE E  17      15.001 119.648  95.741  1.00 69.46           C  
ANISOU 1525  CD1 ILE E  17     9932   8477   7982  -3118    510  -1226       C  
ATOM   1526  H   ILE E  17      12.954 120.314  99.280  1.00 63.91           H  
ATOM   1527  HA  ILE E  17      11.962 122.380  97.821  1.00 76.76           H  
ATOM   1528  HB  ILE E  17      13.299 121.700  96.036  1.00 76.30           H  
ATOM   1529 HG12 ILE E  17      14.559 119.796  97.720  1.00 85.19           H  
ATOM   1530 HG13 ILE E  17      13.317 119.353  96.840  1.00 85.19           H  
ATOM   1531 HG21 ILE E  17      15.386 122.286  96.951  1.00 76.39           H  
ATOM   1532 HG22 ILE E  17      14.256 123.225  97.557  1.00 76.39           H  
ATOM   1533 HG23 ILE E  17      14.822 122.009  98.410  1.00 76.39           H  
ATOM   1534 HD11 ILE E  17      15.285 118.723  95.807  1.00 83.35           H  
ATOM   1535 HD12 ILE E  17      14.527 119.791  94.907  1.00 83.35           H  
ATOM   1536 HD13 ILE E  17      15.772 120.235  95.789  1.00 83.35           H  
HETATM 1537  N   SAR E  18      10.438 120.956  96.348  1.00 64.27           N  
ANISOU 1537  N   SAR E  18    10024   6983   7413   -994   -500   -946       N  
HETATM 1538  CA  SAR E  18       9.543 120.035  95.700  1.00 63.59           C  
ANISOU 1538  CA  SAR E  18     9566   7268   7328   -724   -435   -973       C  
HETATM 1539  C   SAR E  18      10.140 119.457  94.591  1.00 56.82           C  
ANISOU 1539  C   SAR E  18     8594   6732   6263  -1241   -229   -834       C  
HETATM 1540  O   SAR E  18      11.019 120.003  93.980  1.00 71.07           O  
ANISOU 1540  O   SAR E  18    10765   8408   7829  -1834   -229   -665       O  
HETATM 1541  CN  SAR E  18      10.456 122.298  95.739  1.00 60.90           C  
ANISOU 1541  CN  SAR E  18    10361   5988   6791  -1163   -909   -678       C  
HETATM 1542  HN1 SAR E  18       9.578 122.726  95.860  1.00 73.08           H  
HETATM 1543  HN2 SAR E  18      10.652 122.220  94.778  1.00 73.08           H  
HETATM 1544  HN3 SAR E  18      11.146 122.843  96.169  1.00 73.08           H  
HETATM 1545  HA2 SAR E  18       9.000 119.429  96.222  1.00 76.31           H  
HETATM 1546  HA3 SAR E  18       8.950 120.726  95.318  1.00 76.31           H  
ATOM   1547  N   LEU E  19       9.664 118.289  94.203  1.00 50.14           N  
ANISOU 1547  N   LEU E  19     7219   6359   5472  -1093    -21   -933       N  
ATOM   1548  CA  LEU E  19      10.127 117.618  92.976  1.00 61.36           C  
ANISOU 1548  CA  LEU E  19     8450   8169   6695  -1600    208   -865       C  
ATOM   1549  C   LEU E  19       8.939 117.126  92.243  1.00 57.70           C  
ANISOU 1549  C   LEU E  19     7852   7901   6171  -1245    118   -811       C  
ATOM   1550  O   LEU E  19       8.293 116.197  92.677  1.00 59.39           O  
ANISOU 1550  O   LEU E  19     7551   8412   6603   -818    254  -1007       O  
ATOM   1551  CB  LEU E  19      11.092 116.453  93.267  1.00 55.03           C  
ANISOU 1551  CB  LEU E  19     6976   7822   6112  -1888    617  -1140       C  
ATOM   1552  CG  LEU E  19      12.308 117.004  93.954  1.00 59.90           C  
ANISOU 1552  CG  LEU E  19     7732   8227   6802  -2255    663  -1217       C  
ATOM   1553  CD1 LEU E  19      13.059 115.863  94.513  1.00 69.74           C  
ANISOU 1553  CD1 LEU E  19     8297   9803   8396  -2339    904  -1530       C  
ATOM   1554  CD2 LEU E  19      13.119 117.885  92.945  1.00 70.56           C  
ANISOU 1554  CD2 LEU E  19     9579   9454   7775  -2991    675  -1062       C  
ATOM   1555  H   LEU E  19       9.063 117.848  94.633  1.00 60.17           H  
ATOM   1556  HA  LEU E  19      10.587 118.261  92.414  1.00 73.63           H  
ATOM   1557  HB2 LEU E  19      10.664 115.810  93.854  1.00 66.04           H  
ATOM   1558  HB3 LEU E  19      11.364 116.035  92.435  1.00 66.04           H  
ATOM   1559  HG  LEU E  19      12.028 117.569  94.691  1.00 71.89           H  
ATOM   1560 HD11 LEU E  19      13.851 116.197  94.963  1.00 83.68           H  
ATOM   1561 HD12 LEU E  19      12.494 115.391  95.144  1.00 83.68           H  
ATOM   1562 HD13 LEU E  19      13.315 115.269  93.790  1.00 83.68           H  
ATOM   1563 HD21 LEU E  19      13.903 118.238  93.393  1.00 84.67           H  
ATOM   1564 HD22 LEU E  19      13.387 117.336  92.192  1.00 84.67           H  
ATOM   1565 HD23 LEU E  19      12.556 118.613  92.639  1.00 84.67           H  
ATOM   1566  N   MET E  20       8.657 117.732  91.101  1.00 53.50           N  
ANISOU 1566  N   MET E  20     7814   7201   5312  -1477   -134   -536       N  
ATOM   1567  CA  MET E  20       7.386 117.526  90.438  1.00 59.44           C  
ANISOU 1567  CA  MET E  20     8565   8002   6015  -1059   -368   -456       C  
ATOM   1568  C   MET E  20       7.541 116.448  89.382  1.00 69.66           C  
ANISOU 1568  C   MET E  20     9455   9877   7136  -1444    -29   -475       C  
ATOM   1569  O   MET E  20       8.509 116.461  88.617  1.00 74.15           O  
ANISOU 1569  O   MET E  20    10141  10612   7422  -2204    171   -404       O  
ATOM   1570  CB  MET E  20       6.904 118.840  89.829  1.00 72.94           C  
ANISOU 1570  CB  MET E  20    11109   9105   7498  -1055   -983   -127       C  
ATOM   1571  CG  MET E  20       5.443 118.832  89.466  1.00 91.69           C  
ANISOU 1571  CG  MET E  20    13492  11373   9975   -409  -1386   -125       C  
ATOM   1572  SD  MET E  20       4.940 120.393  88.731  1.00 98.99           S  
ANISOU 1572  SD  MET E  20    15453  11451  10707   -409  -2291    269       S  
ATOM   1573  CE  MET E  20       4.367 121.282  90.188  1.00 78.35           C  
ANISOU 1573  CE  MET E  20    12867   8270   8631    411  -2642    -58       C  
ATOM   1574  H   MET E  20       9.188 118.269  90.689  1.00 64.20           H  
ATOM   1575  HA  MET E  20       6.730 117.238  91.091  1.00 71.32           H  
ATOM   1576  HB2 MET E  20       7.048 119.554  90.469  1.00 87.52           H  
ATOM   1577  HB3 MET E  20       7.410 119.015  89.020  1.00 87.52           H  
ATOM   1578  HG2 MET E  20       5.277 118.125  88.823  1.00110.03           H  
ATOM   1579  HG3 MET E  20       4.915 118.689  90.267  1.00110.03           H  
ATOM   1580  HE1 MET E  20       4.061 122.163  89.919  1.00 94.01           H  
ATOM   1581  HE2 MET E  20       3.638 120.787  90.592  1.00 94.01           H  
ATOM   1582  HE3 MET E  20       5.101 121.364  90.816  1.00 94.01           H  
ATOM   1583  N   VAL E  21       6.584 115.512  89.352  1.00 68.12           N  
ANISOU 1583  N   VAL E  21     8757  10017   7107   -953     60   -627       N  
ATOM   1584  CA  VAL E  21       6.453 114.529  88.280  1.00 66.14           C  
ANISOU 1584  CA  VAL E  21     8141  10283   6704  -1207    311   -648       C  
ATOM   1585  C   VAL E  21       5.038 114.590  87.732  1.00 60.42           C  
ANISOU 1585  C   VAL E  21     7538   9500   5917   -705    -34   -538       C  
ATOM   1586  O   VAL E  21       4.118 113.957  88.296  1.00 59.22           O  
ANISOU 1586  O   VAL E  21     6935   9521   6044    -75     14   -767       O  
ATOM   1587  CB  VAL E  21       6.733 113.117  88.775  1.00 78.04           C  
ANISOU 1587  CB  VAL E  21     8817  12305   8528  -1121    775   -989       C  
ATOM   1588  CG1 VAL E  21       6.843 112.144  87.606  1.00 69.68           C  
ANISOU 1588  CG1 VAL E  21     7363  11781   7331  -1506   1071  -1065       C  
ATOM   1589  CG2 VAL E  21       7.967 113.102  89.612  1.00 68.07           C  
ANISOU 1589  CG2 VAL E  21     7408  10989   7465  -1413    973  -1151       C  
ATOM   1590  H   VAL E  21       5.984 115.429  89.963  1.00 81.74           H  
ATOM   1591  HA  VAL E  21       7.074 114.738  87.565  1.00 79.36           H  
ATOM   1592  HB  VAL E  21       5.993 112.828  89.333  1.00 93.64           H  
ATOM   1593 HG11 VAL E  21       7.021 111.255  87.951  1.00 83.62           H  
ATOM   1594 HG12 VAL E  21       6.007 112.147  87.113  1.00 83.62           H  
ATOM   1595 HG13 VAL E  21       7.569 112.427  87.028  1.00 83.62           H  
ATOM   1596 HG21 VAL E  21       8.130 112.196  89.918  1.00 81.68           H  
ATOM   1597 HG22 VAL E  21       8.715 113.410  89.076  1.00 81.68           H  
ATOM   1598 HG23 VAL E  21       7.840 113.691  90.372  1.00 81.68           H  
TER
HETATM 1599  N   ORN F   1       6.572  97.672 104.507  1.00 77.19           N  
ANISOU 1599  N   ORN F   1     9708   6581  13040   -364   1726    404       N  
HETATM 1600  CA  ORN F   1       6.790  98.501 103.294  1.00 74.93           C  
ANISOU 1600  CA  ORN F   1     9605   6705  12161   -111   1514   -137       C  
HETATM 1601  C   ORN F   1       7.019 100.006 103.659  1.00 67.44           C  
ANISOU 1601  C   ORN F   1     8727   6430  10468     40   1894    105       C  
HETATM 1602  O   ORN F   1       6.649 100.532 104.722  1.00 67.03           O  
ANISOU 1602  O   ORN F   1     8532   6542  10393    -61   2282    620       O  
HETATM 1603  CB  ORN F   1       5.586  98.405 102.336  1.00 59.09           C  
ANISOU 1603  CB  ORN F   1     7352   4560  10539   -306   1056   -474       C  
HETATM 1604  CG  ORN F   1       5.493  97.144 101.544  1.00 72.33           C  
ANISOU 1604  CG  ORN F   1     9116   5633  12735   -379    521   -925       C  
HETATM 1605  CD  ORN F   1       6.414  97.089 100.339  1.00 72.76           C  
ANISOU 1605  CD  ORN F   1     9580   5790  12274    -12    243  -1612       C  
HETATM 1606  NE  ORN F   1       6.113  98.154  99.378  1.00 72.65           N  
ANISOU 1606  NE  ORN F   1     9566   6305  11733     70     98  -1924       N  
HETATM 1607  HA  ORN F   1       7.714  98.129 102.843  1.00 89.92           H  
HETATM 1608  HB2 ORN F   1       5.644  99.234 101.617  1.00 70.91           H  
HETATM 1609  HB3 ORN F   1       4.667  98.490 102.933  1.00 70.91           H  
HETATM 1610  HG2 ORN F   1       4.461  97.031 101.192  1.00 86.80           H  
HETATM 1611  HG3 ORN F   1       5.727  96.300 102.203  1.00 86.80           H  
HETATM 1612  HD2 ORN F   1       7.447  97.200 100.680  1.00 87.31           H  
HETATM 1613  HD3 ORN F   1       6.274  96.126  99.839  1.00 87.31           H  
HETATM 1614  HE1 ORN F   1       5.370  97.964  98.708  1.00 87.18           H  
HETATM 1615  H1  ORN F   1       7.230  97.880 105.263  1.00 92.63           H  
HETATM 1616  H2  ORN F   1       5.642  97.791 104.917  1.00 92.63           H  
HETATM 1617  H3  ORN F   1       6.665  96.668 104.334  1.00 92.63           H  
ATOM   1618  N   LEU F   2       7.645 100.727 102.690  1.00 59.25           N  
ANISOU 1618  N   LEU F   2     7940   5796   8776    298   1739   -297       N  
ATOM   1619  CA  LEU F   2       7.886 102.163 102.881  1.00 46.52           C  
ANISOU 1619  CA  LEU F   2     6445   4772   6459    424   1970   -109       C  
ATOM   1620  C   LEU F   2       6.721 102.941 102.325  1.00 61.61           C  
ANISOU 1620  C   LEU F   2     8121   6879   8408    330   1784   -239       C  
ATOM   1621  O   LEU F   2       6.187 102.548 101.291  1.00 55.63           O  
ANISOU 1621  O   LEU F   2     7250   5974   7912    262   1370   -664       O  
ATOM   1622  CB  LEU F   2       9.152 102.558 102.141  1.00 51.20           C  
ANISOU 1622  CB  LEU F   2     7382   5735   6338    705   1872   -383       C  
ATOM   1623  CG  LEU F   2      10.416 101.844 102.599  1.00 55.23           C  
ANISOU 1623  CG  LEU F   2     8106   6117   6763    856   2045   -253       C  
ATOM   1624  CD1 LEU F   2      11.515 102.276 101.683  1.00 56.85           C  
ANISOU 1624  CD1 LEU F   2     8554   6780   6268   1138   1914   -539       C  
ATOM   1625  CD2 LEU F   2      10.677 102.147 104.048  1.00 55.30           C  
ANISOU 1625  CD2 LEU F   2     8158   6145   6708    765   2480    385       C  
ATOM   1626  H   LEU F   2       7.902 100.417 101.931  1.00 71.10           H  
ATOM   1627  HA  LEU F   2       7.988 102.366 103.824  1.00 55.83           H  
ATOM   1628  HB2 LEU F   2       9.032 102.364 101.198  1.00 61.44           H  
ATOM   1629  HB3 LEU F   2       9.295 103.510 102.261  1.00 61.44           H  
ATOM   1630  HG  LEU F   2      10.297 100.886 102.503  1.00 66.28           H  
ATOM   1631 HD11 LEU F   2      12.338 101.836 101.949  1.00 68.23           H  
ATOM   1632 HD12 LEU F   2      11.284 102.026 100.775  1.00 68.23           H  
ATOM   1633 HD13 LEU F   2      11.618 103.238 101.746  1.00 68.23           H  
ATOM   1634 HD21 LEU F   2      11.484 101.686 104.326  1.00 66.36           H  
ATOM   1635 HD22 LEU F   2      10.789 103.105 104.155  1.00 66.36           H  
ATOM   1636 HD23 LEU F   2       9.923 101.841 104.576  1.00 66.36           H  
ATOM   1637  N   VAL F   3       6.295 104.018 102.965  1.00 54.36           N  
ANISOU 1637  N   VAL F   3     6908   5724   8024   -702   2209    121       N  
ATOM   1638  CA  VAL F   3       5.226 104.837 102.448  1.00 44.65           C  
ANISOU 1638  CA  VAL F   3     5354   4769   6841   -435   2064     12       C  
ATOM   1639  C   VAL F   3       5.875 106.216 102.227  1.00 48.87           C  
ANISOU 1639  C   VAL F   3     6336   5222   7012    -66   1850    -36       C  
ATOM   1640  O   VAL F   3       6.282 106.882 103.171  1.00 51.07           O  
ANISOU 1640  O   VAL F   3     6954   5411   7039    165   1999     62       O  
ATOM   1641  CB  VAL F   3       4.035 104.889 103.363  1.00 49.20           C  
ANISOU 1641  CB  VAL F   3     5488   5650   7554   -298   2396    133       C  
ATOM   1642  CG1 VAL F   3       2.991 105.789 102.801  1.00 64.97           C  
ANISOU 1642  CG1 VAL F   3     7156   7933   9598     26   2236     33       C  
ATOM   1643  CG2 VAL F   3       3.499 103.468 103.588  1.00 67.02           C  
ANISOU 1643  CG2 VAL F   3     7300   7964  10199   -748   2548    273       C  
ATOM   1644  HA  VAL F   3       4.938 104.490 101.589  1.00 53.58           H  
ATOM   1645  HB  VAL F   3       4.310 105.247 104.221  1.00 59.03           H  
ATOM   1646 HG11 VAL F   3       2.233 105.808 103.405  1.00 77.97           H  
ATOM   1647 HG12 VAL F   3       3.361 106.680 102.704  1.00 77.97           H  
ATOM   1648 HG13 VAL F   3       2.715 105.449 101.935  1.00 77.97           H  
ATOM   1649 HG21 VAL F   3       2.731 103.510 104.179  1.00 80.42           H  
ATOM   1650 HG22 VAL F   3       3.238 103.090 102.733  1.00 80.42           H  
ATOM   1651 HG23 VAL F   3       4.197 102.927 103.990  1.00 80.42           H  
ATOM   1652  H   VAL F   3       6.663 104.331 103.676  1.00 65.24           H  
ATOM   1653  N   PHE F   4       5.981 106.630 100.961  1.00 47.25           N  
ANISOU 1653  N   PHE F   4     6148   5031   6773    -30   1455   -168       N  
ATOM   1654  CA  PHE F   4       6.365 107.979 100.589  1.00 41.49           C  
ANISOU 1654  CA  PHE F   4     5730   4267   5769    292   1163   -176       C  
ATOM   1655  C   PHE F   4       5.121 108.844 100.470  1.00 42.66           C  
ANISOU 1655  C   PHE F   4     5554   4657   5997    625   1086   -274       C  
ATOM   1656  O   PHE F   4       3.986 108.355 100.475  1.00 54.17           O  
ANISOU 1656  O   PHE F   4     6493   6352   7736    575   1231   -317       O  
ATOM   1657  CB  PHE F   4       7.148 107.948  99.264  1.00 55.24           C  
ANISOU 1657  CB  PHE F   4     7624   5955   7411    156    785   -214       C  
ATOM   1658  CG  PHE F   4       8.391 107.182  99.341  1.00 42.43           C  
ANISOU 1658  CG  PHE F   4     6304   4133   5683    -85    864   -102       C  
ATOM   1659  CD2 PHE F   4       9.585 107.795  99.711  1.00 56.97           C  
ANISOU 1659  CD2 PHE F   4     8611   5793   7241    -12    801    118       C  
ATOM   1660  CD1 PHE F   4       8.391 105.821  99.099  1.00 45.74           C  
ANISOU 1660  CD1 PHE F   4     6557   4518   6302   -388    979   -187       C  
ATOM   1661  CE2 PHE F   4      10.748 107.056  99.829  1.00 47.73           C  
ANISOU 1661  CE2 PHE F   4     7680   4464   5992   -222    900    268       C  
ATOM   1662  CE1 PHE F   4       9.566 105.080  99.182  1.00 55.25           C  
ANISOU 1662  CE1 PHE F   4     8047   5532   7413   -565   1061    -87       C  
ATOM   1663  CZ  PHE F   4      10.722 105.693  99.547  1.00 49.75           C  
ANISOU 1663  CZ  PHE F   4     7754   4710   6440   -474   1048    148       C  
ATOM   1664  H   PHE F   4       5.829 106.123 100.283  1.00 56.70           H  
ATOM   1665  HA  PHE F   4       6.938 108.355 101.277  1.00 49.79           H  
ATOM   1666  HB2 PHE F   4       6.591 107.545  98.580  1.00 66.29           H  
ATOM   1667  HB3 PHE F   4       7.373 108.857  99.011  1.00 66.29           H  
ATOM   1668  HD2 PHE F   4       9.597 108.706  99.899  1.00 68.36           H  
ATOM   1669  HD1 PHE F   4       7.600 105.400  98.849  1.00 54.88           H  
ATOM   1670  HE2 PHE F   4      11.547 107.471 100.061  1.00 57.28           H  
ATOM   1671  HE1 PHE F   4       9.555 104.166  99.010  1.00 66.30           H  
ATOM   1672  HZ  PHE F   4      11.506 105.196  99.609  1.00 59.70           H  
ATOM   1673  N   PHE F   5       5.320 110.155 100.364  1.00 41.25           N  
ANISOU 1673  N   PHE F   5     5668   4415   5591    969    825   -275       N  
ATOM   1674  CA  PHE F   5       4.229 111.089 100.349  1.00 46.47           C  
ANISOU 1674  CA  PHE F   5     6094   5265   6298   1366    743   -366       C  
ATOM   1675  C   PHE F   5       4.410 112.063  99.208  1.00 47.42           C  
ANISOU 1675  C   PHE F   5     6338   5350   6328   1487    217   -408       C  
ATOM   1676  O   PHE F   5       5.530 112.461  98.887  1.00 53.18           O  
ANISOU 1676  O   PHE F   5     7505   5865   6836   1414    -57   -300       O  
ATOM   1677  CB  PHE F   5       4.136 111.840 101.643  1.00 55.11           C  
ANISOU 1677  CB  PHE F   5     7471   6288   7183   1783    958   -335       C  
ATOM   1678  CG  PHE F   5       3.863 110.937 102.818  1.00 67.73           C  
ANISOU 1678  CG  PHE F   5     8905   7991   8838   1698   1501   -259       C  
ATOM   1679  CD1 PHE F   5       2.550 110.579 103.131  1.00 74.56           C  
ANISOU 1679  CD1 PHE F   5     9165   9233   9931   1813   1817   -260       C  
ATOM   1680  CD2 PHE F   5       4.885 110.432 103.586  1.00 69.88           C  
ANISOU 1680  CD2 PHE F   5     9573   8023   8955   1485   1684   -134       C  
ATOM   1681  CE1 PHE F   5       2.256 109.758 104.215  1.00 73.59           C  
ANISOU 1681  CE1 PHE F   5     8836   9268   9859   1723   2314   -121       C  
ATOM   1682  CE2 PHE F   5       4.595 109.592 104.667  1.00 73.73           C  
ANISOU 1682  CE2 PHE F   5     9884   8632   9499   1388   2174    -33       C  
ATOM   1683  CZ  PHE F   5       3.284 109.263 104.965  1.00 75.64           C  
ANISOU 1683  CZ  PHE F   5     9521   9269   9951   1503   2483    -20       C  
ATOM   1684  H   PHE F   5       6.094 110.523 100.299  1.00 49.50           H  
ATOM   1685  HA  PHE F   5       3.396 110.610 100.213  1.00 55.77           H  
ATOM   1686  HB2 PHE F   5       4.976 112.297 101.804  1.00 66.14           H  
ATOM   1687  HB3 PHE F   5       3.413 112.484 101.584  1.00 66.14           H  
ATOM   1688  HD1 PHE F   5       1.852 110.920 102.619  1.00 89.47           H  
ATOM   1689  HD2 PHE F   5       5.767 110.652 103.390  1.00 83.85           H  
ATOM   1690  HE1 PHE F   5       1.376 109.531 104.410  1.00 88.31           H  
ATOM   1691  HE2 PHE F   5       5.286 109.255 105.190  1.00 88.48           H  
ATOM   1692  HZ  PHE F   5       3.101 108.706 105.687  1.00 90.77           H  
ATOM   1693  N   ALA F   6       3.298 112.421  98.610  1.00 46.97           N  
ANISOU 1693  N   ALA F   6     5860   5530   6457   1653     75   -515       N  
ATOM   1694  CA  ALA F   6       3.312 113.317  97.486  1.00 48.36           C  
ANISOU 1694  CA  ALA F   6     6080   5712   6582   1755   -435   -543       C  
ATOM   1695  C   ALA F   6       2.052 114.121  97.512  1.00 51.25           C  
ANISOU 1695  C   ALA F   6     6118   6267   7090   2164   -498   -633       C  
ATOM   1696  O   ALA F   6       1.000 113.652  97.949  1.00 57.49           O  
ANISOU 1696  O   ALA F   6     6432   7306   8107   2236   -168   -669       O  
ATOM   1697  CB  ALA F   6       3.399 112.565  96.132  1.00 49.69           C  
ANISOU 1697  CB  ALA F   6     6008   6008   6864   1362   -662   -588       C  
ATOM   1698  H   ALA F   6       2.513 112.155  98.839  1.00 56.36           H  
ATOM   1699  HA  ALA F   6       4.068 113.920  97.557  1.00 58.03           H  
ATOM   1700  HB1 ALA F   6       3.405 113.213  95.410  1.00 59.63           H  
ATOM   1701  HB2 ALA F   6       4.216 112.042  96.113  1.00 59.63           H  
ATOM   1702  HB3 ALA F   6       2.629 111.980  96.045  1.00 59.63           H  
ATOM   1703  N   GLU F   7       2.173 115.345  97.063  1.00 55.20           N  
ANISOU 1703  N   GLU F   7     6858   6655   7462   2437   -934   -629       N  
ATOM   1704  CA  GLU F   7       1.023 116.174  96.790  1.00 61.09           C  
ANISOU 1704  CA  GLU F   7     7286   7570   8358   2826  -1109   -716       C  
ATOM   1705  C   GLU F   7       0.527 115.829  95.398  1.00 66.06           C  
ANISOU 1705  C   GLU F   7     7465   8427   9208   2534  -1396   -741       C  
ATOM   1706  O   GLU F   7       1.296 115.891  94.441  1.00 66.21           O  
ANISOU 1706  O   GLU F   7     7688   8365   9102   2274  -1760   -685       O  
ATOM   1707  CB  GLU F   7       1.402 117.647  96.901  1.00 82.03           C  
ANISOU 1707  CB  GLU F   7    10441   9938  10789   3235  -1533   -696       C  
ATOM   1708  CG  GLU F   7       0.362 118.437  97.621  1.00 93.11           C  
ANISOU 1708  CG  GLU F   7    11736  11409  12233   3857  -1423   -818       C  
ATOM   1709  CD  GLU F   7       0.738 119.892  97.812  1.00103.46           C  
ANISOU 1709  CD  GLU F   7    13627  12370  13313   4214  -1866   -818       C  
ATOM   1710  OE1 GLU F   7       1.851 120.262  97.393  1.00 93.54           O  
ANISOU 1710  OE1 GLU F   7    12804  10863  11875   3825  -2211   -667       O  
ATOM   1711  OE2 GLU F   7      -0.088 120.656  98.377  1.00 88.09           O1-
ANISOU 1711  OE2 GLU F   7    11660  10475  11337   4622  -1767   -922       O1-
ATOM   1712  H   GLU F   7       2.926 115.729  96.904  1.00 66.24           H  
ATOM   1713  HA  GLU F   7       0.319 115.982  97.430  1.00 73.31           H  
ATOM   1714  HB2 GLU F   7       2.235 117.726  97.391  1.00 98.44           H  
ATOM   1715  HB3 GLU F   7       1.501 118.018  96.010  1.00 98.44           H  
ATOM   1716  HG2 GLU F   7      -0.464 118.406  97.113  1.00111.74           H  
ATOM   1717  HG3 GLU F   7       0.223 118.047  98.499  1.00111.74           H  
ATOM   1718  N   ASP F   8      -0.731 115.406  95.279  1.00 66.54           N  
ANISOU 1718  N   ASP F   8     6906   8796   9582   2557  -1233   -793       N  
ATOM   1719  CA  ASP F   8      -1.288 115.002  93.991  1.00 72.39           C  
ANISOU 1719  CA  ASP F   8     7219   9739  10548   2255  -1532   -819       C  
ATOM   1720  C   ASP F   8      -2.093 116.161  93.411  1.00 75.61           C  
ANISOU 1720  C   ASP F   8     7425  10250  11054   2612  -1915   -832       C  
ATOM   1721  O   ASP F   8      -3.175 116.489  93.912  1.00 96.05           O  
ANISOU 1721  O   ASP F   8     9627  13029  13837   2975  -1738   -831       O  
ATOM   1722  CB  ASP F   8      -2.157 113.761  94.128  1.00 81.33           C  
ANISOU 1722  CB  ASP F   8     7776  11114  12010   1969  -1218   -808       C  
ATOM   1723  CG  ASP F   8      -2.599 113.223  92.784  1.00 96.64           C  
ANISOU 1723  CG  ASP F   8     9380  13188  14152   1594  -1592   -849       C  
ATOM   1724  OD1 ASP F   8      -2.639 114.017  91.811  1.00107.37           O  
ANISOU 1724  OD1 ASP F   8    10786  14563  15447   1683  -2049   -878       O  
ATOM   1725  OD2 ASP F   8      -2.896 112.012  92.704  1.00 90.58           O1-
ANISOU 1725  OD2 ASP F   8     8328  12489  13598   1204  -1468   -844       O1-
ATOM   1726  H   ASP F   8      -1.285 115.344  95.934  1.00 79.85           H  
ATOM   1727  HA  ASP F   8      -0.563 114.798  93.379  1.00 86.87           H  
ATOM   1728  HB2 ASP F   8      -1.652 113.067  94.580  1.00 97.59           H  
ATOM   1729  HB3 ASP F   8      -2.951 113.983  94.639  1.00 97.59           H  
ATOM   1730  N   CYS F   9      -1.584 116.749  92.343  1.00127.01           N  
ANISOU 1730  N   CYS F   9    20603  18367   9289   2885  -3788     94       N  
ATOM   1731  CA  CYS F   9      -2.127 117.987  91.821  1.00134.79           C  
ANISOU 1731  CA  CYS F   9    19407  19798  12011   3159  -2694   2289       C  
ATOM   1732  C   CYS F   9      -3.109 117.696  90.696  1.00144.08           C  
ANISOU 1732  C   CYS F   9    20734  22867  11145   3584  -3290   3254       C  
ATOM   1733  O   CYS F   9      -2.959 116.714  89.965  1.00148.33           O  
ANISOU 1733  O   CYS F   9    22692  24623   9044   4240  -4158   2806       O  
ATOM   1734  CB  CYS F   9      -0.995 118.891  91.339  1.00141.77           C  
ANISOU 1734  CB  CYS F   9    18652  20839  14376   4427  -1272   3980       C  
ATOM   1735  SG  CYS F   9       0.238 119.170  92.625  1.00131.80           S  
ANISOU 1735  SG  CYS F   9    17298  17394  15384   3932   -703   2857       S  
ATOM   1736  H   CYS F   9      -0.915 116.446  91.896  1.00152.42           H  
ATOM   1737  HA  CYS F   9      -2.604 118.450  92.528  1.00161.75           H  
ATOM   1738  HB2 CYS F   9      -0.554 118.473  90.583  1.00170.13           H  
ATOM   1739  HB3 CYS F   9      -1.361 119.750  91.080  1.00170.13           H  
ATOM   1740  HG  CYS F   9       1.100 119.883  92.192  1.00158.16           H  
ATOM   1741  N   GLY F  10      -4.141 118.527  90.615  1.00149.24           N  
ANISOU 1741  N   GLY F  10    19980  23612  13112   3094  -2855   4464       N  
ATOM   1742  CA  GLY F  10      -5.104 118.526  89.530  1.00158.85           C  
ANISOU 1742  CA  GLY F  10    20863  26583  12908   3512  -3179   5770       C  
ATOM   1743  C   GLY F  10      -5.361 119.953  89.080  1.00175.67           C  
ANISOU 1743  C   GLY F  10    20563  28945  17238   4011  -1753   8087       C  
ATOM   1744  O   GLY F  10      -4.524 120.844  89.253  1.00175.93           O  
ANISOU 1744  O   GLY F  10    19274  28204  19368   4496   -510   8953       O  
ATOM   1745  H   GLY F  10      -4.308 119.127  91.208  1.00179.09           H  
ATOM   1746  HA2 GLY F  10      -4.760 118.015  88.781  1.00190.61           H  
ATOM   1747  HA3 GLY F  10      -5.939 118.131  89.827  1.00190.61           H  
ATOM   1748  N   SER F  11      -6.554 120.170  88.506  1.00184.59           N  
ANISOU 1748  N   SER F  11    21115  31139  17883   3848  -1986   9119       N  
ATOM   1749  CA  SER F  11      -6.995 121.511  88.120  1.00185.50           C  
ANISOU 1749  CA  SER F  11    18990  31465  20028   4203   -736  11264       C  
ATOM   1750  C   SER F  11      -7.278 122.363  89.354  1.00185.60           C  
ANISOU 1750  C   SER F  11    18044  29554  22923   3086    -70  10956       C  
ATOM   1751  O   SER F  11      -8.404 122.841  89.546  1.00176.28           O  
ANISOU 1751  O   SER F  11    16093  28337  22550   2411    -27  11467       O  
ATOM   1752  CB  SER F  11      -8.246 121.450  87.242  1.00193.34           C  
ANISOU 1752  CB  SER F  11    19721  34090  19647   4257  -1266  12318       C  
ATOM   1753  OG  SER F  11      -7.952 120.937  85.955  1.00207.19           O  
ANISOU 1753  OG  SER F  11    22112  36995  19617   5170  -1371  12173       O  
ATOM   1754  H   SER F  11      -7.125 119.552  88.330  1.00221.51           H  
ATOM   1755  HA  SER F  11      -6.290 121.942  87.612  1.00222.60           H  
ATOM   1756  HB2 SER F  11      -8.900 120.875  87.667  1.00232.00           H  
ATOM   1757  HB3 SER F  11      -8.606 122.346  87.147  1.00232.00           H  
ATOM   1758  HG  SER F  11      -8.651 120.912  85.489  1.00248.63           H  
ATOM   1759  N   ASN F  12      -6.249 122.560  90.186  1.00188.73           N  
ANISOU 1759  N   ASN F  12    18497  28366  24844   2942    441  10152       N  
ATOM   1760  CA  ASN F  12      -6.344 123.323  91.427  1.00183.30           C  
ANISOU 1760  CA  ASN F  12    17125  25653  26869   1957   1029   9684       C  
ATOM   1761  C   ASN F  12      -7.121 122.527  92.473  1.00172.24           C  
ANISOU 1761  C   ASN F  12    17165  23412  24867    485   -104   7614       C  
ATOM   1762  O   ASN F  12      -8.195 122.947  92.921  1.00172.75           O  
ANISOU 1762  O   ASN F  12    16660  23117  25861   -311    -83   7776       O  
ATOM   1763  CB  ASN F  12      -6.978 124.700  91.166  1.00193.23           C  
ANISOU 1763  CB  ASN F  12    16297  26903  30219   2182   2156  11730       C  
ATOM   1764  CG  ASN F  12      -6.124 125.851  91.697  1.00194.37           C  
ANISOU 1764  CG  ASN F  12    15143  25430  33277   2371   3425  12459       C  
ATOM   1765  ND2 ASN F  12      -6.608 126.508  92.748  1.00187.94           N  
ANISOU 1765  ND2 ASN F  12    14257  22863  34290   1508   3576  11862       N  
ATOM   1766  OD1 ASN F  12      -5.053 126.154  91.157  1.00196.04           O  
ANISOU 1766  OD1 ASN F  12    14835  25873  33778   3322   4081  13380       O  
ATOM   1767  H   ASN F  12      -5.460 122.248  90.043  1.00226.47           H  
ATOM   1768  HA  ASN F  12      -5.450 123.470  91.772  1.00219.96           H  
ATOM   1769  HB2 ASN F  12      -7.087 124.823  90.210  1.00231.88           H  
ATOM   1770  HB3 ASN F  12      -7.842 124.739  91.606  1.00231.88           H  
ATOM   1771 HD21 ASN F  12      -6.167 127.165  93.085  1.00225.53           H  
ATOM   1772 HD22 ASN F  12      -7.362 126.276  93.090  1.00225.53           H  
ATOM   1773  N   LYS F  13      -6.592 121.361  92.853  1.00165.82           N  
ANISOU 1773  N   LYS F  13    18232  22342  22430    154  -1103   5697       N  
ATOM   1774  CA  LYS F  13      -7.143 120.600  93.969  1.00157.87           C  
ANISOU 1774  CA  LYS F  13    18659  20303  21023  -1281  -2136   3608       C  
ATOM   1775  C   LYS F  13      -6.133 119.567  94.456  1.00141.09           C  
ANISOU 1775  C   LYS F  13    18357  17511  17741  -1396  -2859   1652       C  
ATOM   1776  O   LYS F  13      -6.277 118.367  94.205  1.00135.17           O  
ANISOU 1776  O   LYS F  13    19334  17586  14439  -1555  -4127    502       O  
ATOM   1777  CB  LYS F  13      -8.467 119.934  93.575  1.00159.02           C  
ANISOU 1777  CB  LYS F  13    19457  21776  19186  -1871  -3264   3499       C  
ATOM   1778  CG  LYS F  13      -9.529 119.986  94.675  1.00149.98           C  
ANISOU 1778  CG  LYS F  13    18385  19613  18988  -3344  -3620   2597       C  
ATOM   1779  CD  LYS F  13      -9.098 119.270  95.970  1.00140.94           C  
ANISOU 1779  CD  LYS F  13    18803  16794  17953  -4379  -4257    233       C  
ATOM   1780  CE  LYS F  13      -9.772 119.902  97.181  1.00139.34           C  
ANISOU 1780  CE  LYS F  13    17959  15072  19913  -5445  -3848   -174       C  
ATOM   1781  NZ  LYS F  13      -9.719 119.105  98.448  1.00127.30           N1+
ANISOU 1781  NZ  LYS F  13    17136  13365  17867  -4747  -3004  -2207       N1+
ATOM   1782  H   LYS F  13      -5.912 120.991  92.478  1.00198.99           H  
ATOM   1783  HA  LYS F  13      -7.324 121.208  94.704  1.00189.45           H  
ATOM   1784  HB2 LYS F  13      -8.825 120.385  92.795  1.00190.82           H  
ATOM   1785  HB3 LYS F  13      -8.299 119.001  93.368  1.00190.82           H  
ATOM   1786  HG2 LYS F  13      -9.710 120.914  94.893  1.00179.98           H  
ATOM   1787  HG3 LYS F  13     -10.338 119.559  94.352  1.00179.98           H  
ATOM   1788  HD2 LYS F  13      -9.360 118.337  95.925  1.00169.13           H  
ATOM   1789  HD3 LYS F  13      -8.137 119.347  96.077  1.00169.13           H  
ATOM   1790  HE2 LYS F  13      -9.345 120.755  97.358  1.00167.21           H  
ATOM   1791  HE3 LYS F  13     -10.707 120.047  96.969  1.00167.21           H  
ATOM   1792  HZ1 LYS F  13     -10.134 119.545  99.101  1.00152.76           H  
ATOM   1793  HZ2 LYS F  13     -10.119 118.319  98.329  1.00152.76           H  
ATOM   1794  HZ3 LYS F  13      -8.873 118.966  98.684  1.00152.76           H  
ATOM   1795  N   CYS F  14      -5.113 120.022  95.170  1.00130.01           N  
ANISOU 1795  N   CYS F  14    16631  14572  18193  -1335  -2112   1252       N  
ATOM   1796  CA  CYS F  14      -4.113 119.090  95.649  1.00126.05           C  
ANISOU 1796  CA  CYS F  14    17772  13421  16699  -1391  -2731   -554       C  
ATOM   1797  C   CYS F  14      -4.600 118.358  96.898  1.00117.62           C  
ANISOU 1797  C   CYS F  14    18215  11051  15424  -2887  -3727  -2795       C  
ATOM   1798  O   CYS F  14      -5.528 118.777  97.598  1.00 98.89           O  
ANISOU 1798  O   CYS F  14    14980   8444  14150  -3498  -3126  -2714       O  
ATOM   1799  CB  CYS F  14      -2.806 119.804  95.966  1.00116.65           C  
ANISOU 1799  CB  CYS F  14    15699  11090  17533   -819  -1637   -164       C  
ATOM   1800  SG  CYS F  14      -2.148 120.783  94.623  1.00119.12           S  
ANISOU 1800  SG  CYS F  14    14048  12738  18472    860   -332   2574       S  
ATOM   1801  H   CYS F  14      -4.981 120.844  95.384  1.00156.01           H  
ATOM   1802  HA  CYS F  14      -3.938 118.429  94.961  1.00151.26           H  
ATOM   1803  HB2 CYS F  14      -2.952 120.398  96.718  1.00139.98           H  
ATOM   1804  HB3 CYS F  14      -2.139 119.140  96.199  1.00139.98           H  
ATOM   1805  HG  CYS F  14      -1.940 120.067  93.683  1.00142.94           H  
ATOM   1806  N   ALA F  15      -3.954 117.235  97.160  1.00 75.72           N  
ANISOU 1806  N   ALA F  15     7878  11620   9274   1420   -792   -289       N  
ATOM   1807  CA  ALA F  15      -4.134 116.482  98.385  1.00 75.02           C  
ANISOU 1807  CA  ALA F  15     7599  11398   9508   1510   -146    -46       C  
ATOM   1808  C   ALA F  15      -2.850 115.693  98.577  1.00 60.01           C  
ANISOU 1808  C   ALA F  15     6129   9413   7258   1330      4   -144       C  
ATOM   1809  O   ALA F  15      -2.143 115.433  97.617  1.00 64.91           O  
ANISOU 1809  O   ALA F  15     6981  10072   7610   1096   -395   -423       O  
ATOM   1810  CB  ALA F  15      -5.335 115.544  98.319  1.00 94.82           C  
ANISOU 1810  CB  ALA F  15     9365  13798  12864   1314    -93     72       C  
ATOM   1811  H   ALA F  15      -3.386 116.878  96.622  1.00 90.87           H  
ATOM   1812  HA  ALA F  15      -4.247 117.088  99.134  1.00 90.03           H  
ATOM   1813  HB1 ALA F  15      -5.409 115.066  99.160  1.00113.78           H  
ATOM   1814  HB2 ALA F  15      -6.136 116.068  98.164  1.00113.78           H  
ATOM   1815  HB3 ALA F  15      -5.204 114.916  97.591  1.00113.78           H  
ATOM   1816  N   ILE F  16      -2.524 115.371  99.814  1.00 65.99           N  
ANISOU 1816  N   ILE F  16     7006  10089   7978   1467    579     94       N  
ATOM   1817  CA  ILE F  16      -1.393 114.501 100.102  1.00 64.20           C  
ANISOU 1817  CA  ILE F  16     7105   9753   7533   1301    758     57       C  
ATOM   1818  C   ILE F  16      -1.860 113.083  99.896  1.00 58.18           C  
ANISOU 1818  C   ILE F  16     5892   8767   7447    990    762     15       C  
ATOM   1819  O   ILE F  16      -2.894 112.700 100.418  1.00 66.98           O  
ANISOU 1819  O   ILE F  16     6495   9802   9153    979   1005    254       O  
ATOM   1820  CB  ILE F  16      -0.917 114.671 101.551  1.00 68.20           C  
ANISOU 1820  CB  ILE F  16     7905  10238   7769   1536   1348    368       C  
ATOM   1821  CG1 ILE F  16      -0.679 116.136 101.868  1.00 72.97           C  
ANISOU 1821  CG1 ILE F  16     8952  10997   7778   1872   1318    436       C  
ATOM   1822  CG2 ILE F  16       0.348 113.862 101.777  1.00 65.10           C  
ANISOU 1822  CG2 ILE F  16     7872   9746   7118   1365   1471    347       C  
ATOM   1823  CD1 ILE F  16       0.312 116.736 100.887  1.00 78.88           C  
ANISOU 1823  CD1 ILE F  16    10148  11815   8007   1719    750    215       C  
ATOM   1824  H   ILE F  16      -2.943 115.644 100.514  1.00 79.19           H  
ATOM   1825  HA  ILE F  16      -0.659 114.690  99.497  1.00 77.04           H  
ATOM   1826  HB  ILE F  16      -1.608 114.336 102.144  1.00 81.84           H  
ATOM   1827 HG12 ILE F  16      -1.515 116.622 101.797  1.00 87.57           H  
ATOM   1828 HG13 ILE F  16      -0.314 116.218 102.763  1.00 87.57           H  
ATOM   1829 HG21 ILE F  16       0.637 113.979 102.696  1.00 78.12           H  
ATOM   1830 HG22 ILE F  16       0.159 112.926 101.606  1.00 78.12           H  
ATOM   1831 HG23 ILE F  16       1.036 114.178 101.171  1.00 78.12           H  
ATOM   1832 HD11 ILE F  16       0.448 117.670 101.109  1.00 94.65           H  
ATOM   1833 HD12 ILE F  16       1.151 116.254 100.952  1.00 94.65           H  
ATOM   1834 HD13 ILE F  16      -0.047 116.657  99.989  1.00 94.65           H  
ATOM   1835  N   ILE F  17      -1.078 112.286  99.207  1.00 52.52           N  
ANISOU 1835  N   ILE F  17     5371   7948   6637    755    509   -259       N  
ATOM   1836  CA  ILE F  17      -1.370 110.861  99.165  1.00 55.46           C  
ANISOU 1836  CA  ILE F  17     5430   8014   7627    475    514   -295       C  
ATOM   1837  C   ILE F  17      -0.197 110.061  99.640  1.00 60.60           C  
ANISOU 1837  C   ILE F  17     6442   8513   8071    442    753   -306       C  
ATOM   1838  O   ILE F  17       0.928 110.540  99.600  1.00 48.86           O  
ANISOU 1838  O   ILE F  17     5440   7198   5927    577    768   -386       O  
ATOM   1839  CB  ILE F  17      -1.743 110.456  97.769  1.00 66.72           C  
ANISOU 1839  CB  ILE F  17     6698   9372   9280    221   -101   -673       C  
ATOM   1840  CG1 ILE F  17      -0.578 110.736  96.820  1.00 64.35           C  
ANISOU 1840  CG1 ILE F  17     6915   9257   8277    246   -435  -1056       C  
ATOM   1841  CG2 ILE F  17      -2.936 111.281  97.363  1.00 62.31           C  
ANISOU 1841  CG2 ILE F  17     5744   8968   8962    250   -338   -598       C  
ATOM   1842  CD1 ILE F  17      -0.779 110.159  95.485  1.00 69.08           C  
ANISOU 1842  CD1 ILE F  17     7449   9780   9020      6  -1005  -1475       C  
ATOM   1843  H   ILE F  17      -0.384 112.530  98.762  1.00 63.03           H  
ATOM   1844  HA  ILE F  17      -2.122 110.671  99.748  1.00 66.55           H  
ATOM   1845  HB  ILE F  17      -1.969 109.513  97.747  1.00 80.06           H  
ATOM   1846 HG12 ILE F  17      -0.477 111.696  96.719  1.00 77.22           H  
ATOM   1847 HG13 ILE F  17       0.232 110.354  97.192  1.00 77.22           H  
ATOM   1848 HG21 ILE F  17      -3.196 111.036  96.461  1.00 74.77           H  
ATOM   1849 HG22 ILE F  17      -3.665 111.105  97.978  1.00 74.77           H  
ATOM   1850 HG23 ILE F  17      -2.695 112.220  97.395  1.00 74.77           H  
ATOM   1851 HD11 ILE F  17      -0.011 110.370  94.931  1.00 82.90           H  
ATOM   1852 HD12 ILE F  17      -0.873 109.198  95.568  1.00 82.90           H  
ATOM   1853 HD13 ILE F  17      -1.582 110.539  95.095  1.00 82.90           H  
HETATM 1854  N   SAR F  18      -0.421 108.817 100.036  1.00 50.31           N  
ANISOU 1854  N   SAR F  18     4897   6881   7336    242    888   -208       N  
HETATM 1855  CA  SAR F  18       0.742 107.921 100.244  1.00 52.96           C  
ANISOU 1855  CA  SAR F  18     5579   7020   7522    198    994   -298       C  
HETATM 1856  C   SAR F  18       1.000 107.154  99.127  1.00 49.82           C  
ANISOU 1856  C   SAR F  18     5257   6450   7223     43    532   -736       C  
HETATM 1857  O   SAR F  18       0.115 106.819  98.366  1.00 63.96           O  
ANISOU 1857  O   SAR F  18     6745   8104   9453   -154    142   -917       O  
HETATM 1858  CN  SAR F  18      -1.745 108.181 100.263  1.00 55.70           C  
ANISOU 1858  CN  SAR F  18     4959   7363   8839     32    900     17       C  
HETATM 1859  HN1 SAR F  18      -1.820 107.371  99.709  1.00 66.83           H  
HETATM 1860  HN2 SAR F  18      -2.459 108.813 100.018  1.00 66.83           H  
HETATM 1861  HN3 SAR F  18      -1.833 107.939 101.206  1.00 66.83           H  
HETATM 1862  HA2 SAR F  18       1.534 108.246 100.693  1.00 63.55           H  
HETATM 1863  HA3 SAR F  18       0.279 107.299 100.856  1.00 63.55           H  
ATOM   1864  N   LEU F  19       2.266 106.842  98.909  1.00 47.94           N  
ANISOU 1864  N   LEU F  19     5447   6226   6542    139    523   -948       N  
ATOM   1865  CA  LEU F  19       2.662 105.889  97.886  1.00 60.72           C  
ANISOU 1865  CA  LEU F  19     7198   7636   8235     53    121  -1422       C  
ATOM   1866  C   LEU F  19       3.439 104.772  98.530  1.00 64.98           C  
ANISOU 1866  C   LEU F  19     7895   7836   8958     66    357  -1357       C  
ATOM   1867  O   LEU F  19       4.546 104.978  99.019  1.00 47.19           O  
ANISOU 1867  O   LEU F  19     5952   5752   6227    257    651  -1232       O  
ATOM   1868  CB  LEU F  19       3.534 106.553  96.810  1.00 60.77           C  
ANISOU 1868  CB  LEU F  19     7565   8055   7471    216   -155  -1792       C  
ATOM   1869  CG  LEU F  19       2.736 107.634  96.107  1.00 71.35           C  
ANISOU 1869  CG  LEU F  19     8750   9698   8664    171   -463  -1851       C  
ATOM   1870  CD1 LEU F  19       3.651 108.457  95.274  1.00 89.80           C  
ANISOU 1870  CD1 LEU F  19    11432  12510  10178    315   -667  -2062       C  
ATOM   1871  CD2 LEU F  19       1.642 106.974  95.259  1.00 78.64           C  
ANISOU 1871  CD2 LEU F  19     9363  10339  10178    -82   -929  -2130       C  
ATOM   1872  H   LEU F  19       2.927 107.174  99.348  1.00 57.52           H  
ATOM   1873  HA  LEU F  19       1.873 105.516  97.462  1.00 72.86           H  
ATOM   1874  HB2 LEU F  19       4.310 106.960  97.225  1.00 72.93           H  
ATOM   1875  HB3 LEU F  19       3.804 105.891  96.154  1.00 72.93           H  
ATOM   1876  HG  LEU F  19       2.315 108.208  96.765  1.00 85.63           H  
ATOM   1877 HD11 LEU F  19       3.135 109.146  94.827  1.00107.76           H  
ATOM   1878 HD12 LEU F  19       4.320 108.863  95.847  1.00107.76           H  
ATOM   1879 HD13 LEU F  19       4.079 107.885  94.618  1.00107.76           H  
ATOM   1880 HD21 LEU F  19       1.131 107.666  94.809  1.00 94.37           H  
ATOM   1881 HD22 LEU F  19       2.058 106.391  94.605  1.00 94.37           H  
ATOM   1882 HD23 LEU F  19       1.061 106.459  95.840  1.00 94.37           H  
ATOM   1883  N   MET F  20       2.883 103.577  98.509  1.00 54.67           N  
ANISOU 1883  N   MET F  20     6384   6032   8355   -151    181  -1424       N  
ATOM   1884  CA  MET F  20       3.438 102.485  99.296  1.00 53.78           C  
ANISOU 1884  CA  MET F  20     6358   5519   8558   -174    404  -1264       C  
ATOM   1885  C   MET F  20       4.367 101.633  98.459  1.00 59.87           C  
ANISOU 1885  C   MET F  20     7486   6085   9176    -41    106  -1783       C  
ATOM   1886  O   MET F  20       3.991 101.187  97.379  1.00 69.59           O  
ANISOU 1886  O   MET F  20     8736   7137  10568   -119   -390  -2248       O  
ATOM   1887  CB  MET F  20       2.311 101.625  99.876  1.00 62.76           C  
ANISOU 1887  CB  MET F  20     7060   6196  10591   -510    372   -955       C  
ATOM   1888  CG  MET F  20       2.810 100.581 100.880  1.00 72.99           C  
ANISOU 1888  CG  MET F  20     8407   7082  12244   -574    632   -660       C  
ATOM   1889  SD  MET F  20       1.500  99.716 101.792  1.00 88.24           S  
ANISOU 1889  SD  MET F  20     9765   8585  15178  -1014    674    -98       S  
ATOM   1890  CE  MET F  20       1.053 101.010 102.945  1.00 86.30           C  
ANISOU 1890  CE  MET F  20     9253   8916  14620   -904   1329    501       C  
ATOM   1891  H   MET F  20       2.186 103.368  98.051  1.00 65.60           H  
ATOM   1892  HA  MET F  20       3.939 102.858 100.038  1.00 64.54           H  
ATOM   1893  HB2 MET F  20       1.678 102.201 100.334  1.00 75.32           H  
ATOM   1894  HB3 MET F  20       1.867 101.156  99.152  1.00 75.32           H  
ATOM   1895  HG2 MET F  20       3.324  99.912 100.401  1.00 87.59           H  
ATOM   1896  HG3 MET F  20       3.378 101.023 101.530  1.00 87.59           H  
ATOM   1897  HE1 MET F  20       0.341 100.688 103.520  1.00103.55           H  
ATOM   1898  HE2 MET F  20       1.830 101.240 103.478  1.00103.55           H  
ATOM   1899  HE3 MET F  20       0.752 101.786 102.447  1.00103.55           H  
ATOM   1900  N   VAL F  21       5.557 101.339  98.991  1.00 51.70           N  
ANISOU 1900  N   VAL F  21     6733   5049   7862    168    402  -1693       N  
ATOM   1901  CA  VAL F  21       6.467 100.376  98.358  1.00 64.33           C  
ANISOU 1901  CA  VAL F  21     8643   6407   9392    359    186  -2146       C  
ATOM   1902  C   VAL F  21       6.830  99.311  99.391  1.00 76.32           C  
ANISOU 1902  C   VAL F  21    10170   7422  11407    315    410  -1846       C  
ATOM   1903  O   VAL F  21       7.721  99.507 100.217  1.00 59.57           O  
ANISOU 1903  O   VAL F  21     8175   5466   8992    463    818  -1509       O  
ATOM   1904  CB  VAL F  21       7.753 101.036  97.827  1.00 59.76           C  
ANISOU 1904  CB  VAL F  21     8398   6387   7920    719    286  -2352       C  
ATOM   1905  CG1 VAL F  21       8.579 100.030  97.079  1.00 63.75           C  
ANISOU 1905  CG1 VAL F  21     9180   6683   8359    978     64  -2866       C  
ATOM   1906  CG2 VAL F  21       7.443 102.247  96.951  1.00 69.85           C  
ANISOU 1906  CG2 VAL F  21     9660   8224   8656    727     94  -2520       C  
ATOM   1907  H   VAL F  21       5.861 101.682  99.718  1.00 62.04           H  
ATOM   1908  HA  VAL F  21       6.015  99.944  97.617  1.00 77.19           H  
ATOM   1909  HB  VAL F  21       8.278 101.345  98.581  1.00 71.71           H  
ATOM   1910 HG11 VAL F  21       9.383 100.462  96.753  1.00 76.50           H  
ATOM   1911 HG12 VAL F  21       8.813  99.305  97.680  1.00 76.50           H  
ATOM   1912 HG13 VAL F  21       8.061  99.688  96.334  1.00 76.50           H  
ATOM   1913 HG21 VAL F  21       8.277 102.632  96.638  1.00 83.82           H  
ATOM   1914 HG22 VAL F  21       6.906 101.961  96.195  1.00 83.82           H  
ATOM   1915 HG23 VAL F  21       6.954 102.899  97.476  1.00 83.82           H  
TER
HETATM 1916  O   HOH S   2       8.095 112.974  99.366  1.00 42.23           O  
HETATM 1917  O   HOH S   3       9.765 112.567 100.545  1.00 40.46           O  
HETATM 1918  O   HOH S   4       0.462 103.248  97.049  1.00 67.58           O  
HETATM 1919  O   HOH S   5       1.061  96.383  88.917  1.00 61.85           O  
HETATM 1920  O   HOH S   6      15.780  91.783  94.934  1.00 44.76           O  
HETATM 1921  O   HOH S   7       5.539  90.856  82.489  1.00 66.90           O  
HETATM 1922  O   HOH S   8       3.392  94.669  94.910  1.00 62.21           O  
HETATM 1923  O   HOH S   9      18.766 103.374 103.665  1.00 64.98           O  
HETATM 1924  O   HOH S  10      14.592  91.226  93.313  1.00 44.83           O  
HETATM 1925  O   HOH S  11      16.556  91.323  92.911  1.00 44.87           O  
HETATM 1926  O   HOH S  12      27.039  84.324  97.591  1.00 60.77           O  
HETATM 1927  O   HOH S  13      19.673 106.819 103.765  1.00 60.54           O  
HETATM 1928  O   HOH S  14      13.557  87.593 110.803  1.00 70.76           O  
HETATM 1929  O   HOH S  15      11.482  87.760  80.180  1.00 75.08           O  
HETATM 1930  O   HOH S  16      10.240  98.452 105.186  1.00 70.89           O  
HETATM 1931  O   HOH S  17      13.660  88.321  79.995  1.00 59.23           O  
HETATM 1932  O   HOH S  18       3.798  97.065  97.385  1.00 72.90           O  
HETATM 1933  O   HOH S  19       7.053  81.954  91.452  1.00 63.84           O  
HETATM 1934  O   HOH S  20      15.338  85.706  80.082  1.00 79.80           O  
HETATM 1935  O   HOH S  21      15.518  89.996  81.346  1.00 66.79           O  
HETATM 1936  O   HOH S  22      19.091  92.295  81.350  1.00 60.98           O  
HETATM 1937  O   HOH S  24      10.504 119.598  89.753  1.00 68.40           O  
HETATM 1938  O   HOH S  25      24.376  96.286  80.977  1.00 66.16           O  
HETATM 1939  O   HOH S  27       8.930  92.578 108.449  1.00 65.01           O  
HETATM 1940  O   HOH S  28       8.097 111.305 100.734  1.00 38.52           O  
HETATM 1941  O   HOH S  29      21.583 123.909  98.807  1.00 76.12           O  
HETATM 1942  O   HOH S  30      21.338  88.348  83.031  1.00 76.40           O  
HETATM 1943  O   HOH S  31      28.478  95.187  98.375  1.00 71.05           O  
HETATM 1944  O   HOH S  32      23.137  98.626 100.995  1.00 72.56           O  
HETATM 1945  O   HOH S  33      22.531  94.932 103.193  1.00 82.34           O  
HETATM 1946  O   HOH S  34      23.994 108.308  98.586  1.00 79.23           O  
HETATM 1947  O   HOH S  37      14.383 125.808  97.581  1.00 76.53           O  
HETATM 1948  O   HOH S  38      16.917 125.201  97.495  1.00 70.42           O  
HETATM 1949  O   HOH S  39      29.652  85.820  84.845  1.00 85.74           O  
HETATM 1950  O   HOH S  41      19.682  91.381 104.933  1.00 83.20           O  
HETATM 1951  O   HOH S  42      16.649  97.919  87.981  1.00 88.47           O  
HETATM 1952  O   HOH S  43       4.973  84.154  93.490  1.00 90.65           O  
HETATM 1954  O   HOH S  44      -4.920 115.273  89.459  1.00 94.95           O  
HETATM 1956  C38 JEF G   1       6.790 105.343  94.647  1.00 80.11           C  
HETATM 1957  O12 JEF G   1       7.667 105.905  93.706  1.00 99.50           O  
HETATM 1958  C37 JEF G   1       8.984 106.075  94.161  1.00 97.20           C  
HETATM 1959  C36 JEF G   1       9.221 107.544  94.530  1.00 83.61           C  
HETATM 1960  O11 JEF G   1      10.352 107.585  95.347  1.00 86.08           O  
HETATM 1961  C33 JEF G   1      11.144 108.732  95.329  1.00 67.11           C  
HETATM 1962  C34 JEF G   1      10.590 109.650  96.399  1.00 71.41           C  
HETATM 1963  C32 JEF G   1      12.605 108.343  95.642  1.00 88.50           C  
HETATM 1964  O10 JEF G   1      12.675 107.120  96.347  1.00104.89           O  
HETATM 1965  C19 JEF G   1      13.743 106.230  96.067  1.00 99.30           C  
HETATM 1966  C40 JEF G   1      14.883 106.642  97.008  1.00 76.23           C  
HETATM 1967  C20 JEF G   1      13.334 104.726  96.228  1.00 97.57           C  
HETATM 1968  O   JEF G   1      12.262 104.335  95.365  1.00107.01           O  
HETATM 1969  C   JEF G   1      11.727 103.008  95.378  1.00100.63           C  
HETATM 1970  C18 JEF G   1      12.853 101.963  95.319  1.00 82.46           C  
HETATM 1971  C17 JEF G   1      10.737 102.847  94.182  1.00108.07           C  
HETATM 1972  OH  JEF G   1      10.201 101.535  93.998  1.00119.37           O  
HETATM 1973  C2  JEF G   1       9.496 101.250  92.775  1.00106.88           C  
HETATM 1974  C1  JEF G   1       8.132 101.950  92.727  1.00 92.95           C  
HETATM 1975  C3  JEF G   1       9.215  99.742  92.541  1.00 95.94           C  
HETATM 1976  O2  JEF G   1      10.339  98.946  92.862  1.00102.57           O  
HETATM 1977  C5  JEF G   1      11.079  98.212  91.904  1.00 99.02           C  
HETATM 1978  C6  JEF G   1      11.215  98.921  90.550  1.00 97.36           C  
HETATM 1979  C4  JEF G   1      12.486  98.039  92.506  1.00100.93           C  
HETATM 1980  O3  JEF G   1      13.395  97.413  91.626  1.00 96.90           O  
HETATM 1981  C7  JEF G   1      14.700  97.237  92.133  1.00 89.07           C  
HETATM 1982  C9  JEF G   1      15.395  96.085  91.421  1.00 88.52           C  
HETATM 1983  C8  JEF G   1      15.502  98.522  91.896  1.00109.64           C  
HETATM 1984  O4  JEF G   1      16.587  98.661  92.794  1.00113.93           O  
HETATM 1985  C11 JEF G   1      16.381  99.244  94.068  1.00107.78           C  
HETATM 1986  C12 JEF G   1      15.524 100.520  94.023  1.00 92.77           C  
HETATM 1987  C10 JEF G   1      17.759  99.540  94.690  1.00104.69           C  
HETATM 1988  O5  JEF G   1      18.420 100.571  93.993  1.00113.54           O  
HETATM 1989  C13 JEF G   1      18.587 101.794  94.680  1.00105.26           C  
HETATM 1990  C15 JEF G   1      18.713 102.968  93.686  1.00 97.94           C  
HETATM 1991  C14 JEF G   1      19.844 101.701  95.552  1.00 96.18           C  
HETATM 1992  O6  JEF G   1      19.947 102.816  96.403  1.00110.86           O  
HETATM 1993  C16 JEF G   1      20.886 103.800  96.039  1.00101.79           C  
HETATM 1994  C30 JEF G   1      20.615 105.108  96.800  1.00104.84           C  
HETATM 1995  C31 JEF G   1      20.095 104.833  98.230  1.00 93.75           C  
HETATM 1996  N1  JEF G   1      21.861 105.865  96.848  1.00 99.12           N  
HETATM 1997 HN11 JEF G   1      22.116 105.964  97.696  1.00118.94           H  
HETATM 1998 HN12 JEF G   1      22.492 105.427  96.399  1.00118.94           H  
HETATM 1999  H30 JEF G   1      19.951 105.623  96.316  1.00125.81           H  
HETATM 2000 H313 JEF G   1      19.136 104.978  98.259  1.00112.50           H  
HETATM 2001 H312 JEF G   1      20.531 105.433  98.855  1.00112.50           H  
HETATM 2002 H311 JEF G   1      20.290 103.914  98.474  1.00112.50           H  
HETATM 2003 H161 JEF G   1      20.824 103.966  95.085  1.00122.15           H  
HETATM 2004 H162 JEF G   1      21.779 103.485  96.252  1.00122.15           H  
HETATM 2005 H141 JEF G   1      19.801 100.894  96.089  1.00115.42           H  
HETATM 2006 H142 JEF G   1      20.627 101.663  94.981  1.00115.42           H  
HETATM 2007  H13 JEF G   1      17.817 101.944  95.250  1.00126.31           H  
HETATM 2008 H153 JEF G   1      18.850 103.794  94.177  1.00117.53           H  
HETATM 2009 H152 JEF G   1      17.901 103.035  93.160  1.00117.53           H  
HETATM 2010 H151 JEF G   1      19.468 102.813  93.097  1.00117.53           H  
HETATM 2011 H101 JEF G   1      18.301  98.736  94.658  1.00125.63           H  
HETATM 2012 H102 JEF G   1      17.639  99.807  95.615  1.00125.63           H  
HETATM 2013  H11 JEF G   1      15.927  98.595  94.628  1.00129.34           H  
HETATM 2014 H123 JEF G   1      15.750 101.087  94.777  1.00111.32           H  
HETATM 2015 H122 JEF G   1      15.697 100.997  93.196  1.00111.32           H  
HETATM 2016 H121 JEF G   1      14.585 100.281  94.069  1.00111.32           H  
HETATM 2017  H81 JEF G   1      14.910  99.283  91.999  1.00131.57           H  
HETATM 2018  H82 JEF G   1      15.846  98.513  90.989  1.00131.57           H  
HETATM 2019  H7  JEF G   1      14.657  97.052  93.084  1.00106.89           H  
HETATM 2020  H93 JEF G   1      15.449  96.278  90.472  1.00106.22           H  
HETATM 2021  H92 JEF G   1      16.289  95.975  91.781  1.00106.22           H  
HETATM 2022  H91 JEF G   1      14.889  95.269  91.557  1.00106.22           H  
HETATM 2023  H41 JEF G   1      12.416  97.504  93.312  1.00121.12           H  
HETATM 2024  H42 JEF G   1      12.834  98.913  92.742  1.00121.12           H  
HETATM 2025  H5  JEF G   1      10.671  97.342  91.775  1.00118.82           H  
HETATM 2026  H63 JEF G   1      11.788  98.398  89.968  1.00116.83           H  
HETATM 2027  H62 JEF G   1      10.339  99.015  90.145  1.00116.83           H  
HETATM 2028  H61 JEF G   1      11.606  99.799  90.683  1.00116.83           H  
HETATM 2029  H31 JEF G   1       8.986  99.604  91.608  1.00115.13           H  
HETATM 2030  H32 JEF G   1       8.466  99.470  93.094  1.00115.13           H  
HETATM 2031  H2  JEF G   1      10.031 101.577  92.035  1.00128.25           H  
HETATM 2032 H13A JEF G   1       8.058 102.458  91.905  1.00111.54           H  
HETATM 2033  H12 JEF G   1       8.049 102.548  93.486  1.00111.54           H  
HETATM 2034 H11A JEF G   1       7.426 101.285  92.761  1.00111.54           H  
HETATM 2035 H171 JEF G   1       9.997 103.460  94.316  1.00129.68           H  
HETATM 2036 H172 JEF G   1      11.200 103.102  93.369  1.00129.68           H  
HETATM 2037  H   JEF G   1      11.235 102.883  96.204  1.00120.76           H  
HETATM 2038 H183 JEF G   1      13.542 102.263  94.706  1.00 98.95           H  
HETATM 2039 H182 JEF G   1      12.493 101.117  95.011  1.00 98.95           H  
HETATM 2040 H181 JEF G   1      13.234 101.849  96.204  1.00 98.95           H  
HETATM 2041 H201 JEF G   1      14.107 104.172  96.034  1.00117.08           H  
HETATM 2042 H202 JEF G   1      13.065 104.573  97.147  1.00117.08           H  
HETATM 2043  H19 JEF G   1      14.031 106.373  95.152  1.00119.16           H  
HETATM 2044 H403 JEF G   1      15.411 105.862  97.237  1.00 91.48           H  
HETATM 2045 H402 JEF G   1      14.512 107.030  97.816  1.00 91.48           H  
HETATM 2046 H401 JEF G   1      15.448 107.296  96.565  1.00 91.48           H  
HETATM 2047 H321 JEF G   1      13.011 109.041  96.179  1.00106.21           H  
HETATM 2048 H322 JEF G   1      13.096 108.257  94.810  1.00106.21           H  
HETATM 2049  H33 JEF G   1      11.091 109.160  94.460  1.00 80.53           H  
HETATM 2050 H343 JEF G   1      11.171 109.629  97.175  1.00 85.69           H  
HETATM 2051 H342 JEF G   1      10.543 110.556  96.055  1.00 85.69           H  
HETATM 2052 H341 JEF G   1       9.702 109.354  96.652  1.00 85.69           H  
HETATM 2053 H361 JEF G   1       9.375 108.066  93.727  1.00100.34           H  
HETATM 2054 H362 JEF G   1       8.454 107.893  95.009  1.00100.34           H  
HETATM 2055 H371 JEF G   1       9.603 105.814  93.461  1.00116.64           H  
HETATM 2056 H372 JEF G   1       9.129 105.519  94.943  1.00116.64           H  
HETATM 2057 H383 JEF G   1       6.717 105.932  95.413  1.00 96.13           H  
HETATM 2058 H382 JEF G   1       7.133 104.481  94.933  1.00 96.13           H  
HETATM 2059 H381 JEF G   1       5.916 105.225  94.244  1.00 96.13           H  
END
